# Supplementary material for: Relationship between the Hemoglobin-to-Red Cell Distribution Width Ratio and All-Cause Mortality in Septic Patients with Atrial Fibrillation: Based on Propensity Score Matching Method
Source: MDPI journal article supplement (doi:10.3390/jcdd9110400), 2022-11-18
Supplement: s1 [file s1]

## Supplementary Materials

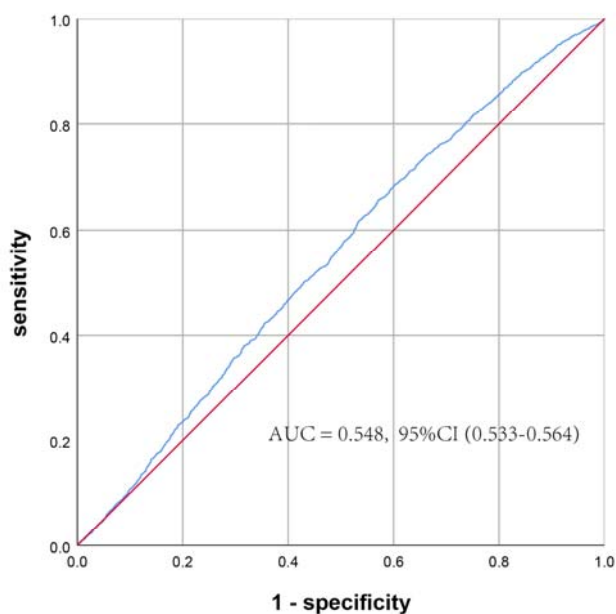

**Figure S1.** The ROC curve of HRR.

**Table S1:** The best cut-off value, specificity, sensitivity and Youden Index of HRR.

| Cut-off value | Sensitivity | 1 - Specificity | Youden Index |
|---------------|-------------|-----------------|--------------|
| 5.877075628   | 0.656       | 0.571           | 0.0850       |
| 5.878120487   | 0.656       | 0.571           | 0.0850       |
| 5.884033613   | 0.655       | 0.57            | 0.0850       |
| 5.885895118   | 0.655       | 0.57            | 0.0850       |
| 5.886300386   | 0.655       | 0.57            | 0.0850       |
| 5.889990756   | 0.654       | 0.569           | 0.0850       |
| 5.722717459   | 0.687       | 0.603           | 0.0840       |
| 5.723287888   | 0.687       | 0.603           | 0.0840       |
| 5.734105344   | 0.684       | 0.6             | 0.0840       |
| 5.734779926   | 0.684       | 0.6             | 0.0840       |
| 5.866294227   | 0.659       | 0.575           | 0.0840       |
| 5.86746507    | 0.659       | 0.575           | 0.0840       |
| 5.870807254   | 0.658       | 0.574           | 0.0840       |
| 5.873109449   | 0.657       | 0.573           | 0.0840       |
| 5.874562937   | 0.657       | 0.573           | 0.0840       |
| 5.875997437   | 0.656       | 0.572           | 0.0840       |
| 5.878583129   | 0.655       | 0.571           | 0.0840       |

|             |       |       |        |
|-------------|-------|-------|--------|
| 5.88057041  | 0.655 | 0.571 | 0.0840 |
| 5.882352941 | 0.655 | 0.571 | 0.0840 |
| 5.888047687 | 0.654 | 0.57  | 0.0840 |
| 5.890941914 | 0.653 | 0.569 | 0.0840 |
| 5.89168238  | 0.653 | 0.569 | 0.0840 |
| 5.892374517 | 0.653 | 0.569 | 0.0840 |
| 5.893448439 | 0.653 | 0.569 | 0.0840 |
| 6.064665472 | 0.617 | 0.533 | 0.0840 |
| 6.065740741 | 0.617 | 0.533 | 0.0840 |
| 5.717967599 | 0.687 | 0.604 | 0.0830 |
| 5.721935853 | 0.687 | 0.604 | 0.0830 |
| 5.722382787 | 0.687 | 0.604 | 0.0830 |
| 5.723911071 | 0.686 | 0.603 | 0.0830 |
| 5.724387806 | 0.686 | 0.603 | 0.0830 |
| 5.729818684 | 0.685 | 0.602 | 0.0830 |
| 5.731350735 | 0.685 | 0.602 | 0.0830 |
| 5.733639144 | 0.684 | 0.601 | 0.0830 |
| 5.735864113 | 0.683 | 0.6   | 0.0830 |
| 5.737069513 | 0.683 | 0.6   | 0.0830 |
| 5.738674944 | 0.683 | 0.6   | 0.0830 |
| 5.740192856 | 0.683 | 0.6   | 0.0830 |
| 5.741338112 | 0.683 | 0.6   | 0.0830 |
| 5.742589364 | 0.683 | 0.6   | 0.0830 |
| 5.762150634 | 0.679 | 0.596 | 0.0830 |
| 5.763300377 | 0.679 | 0.596 | 0.0830 |
| 5.771620326 | 0.678 | 0.595 | 0.0830 |
| 5.772084902 | 0.678 | 0.595 | 0.0830 |
| 5.864035938 | 0.66  | 0.577 | 0.0830 |
| 5.864429592 | 0.659 | 0.576 | 0.0830 |
| 5.865291721 | 0.659 | 0.576 | 0.0830 |
| 5.868914345 | 0.658 | 0.575 | 0.0830 |
| 5.869565217 | 0.658 | 0.575 | 0.0830 |
| 5.870105992 | 0.658 | 0.575 | 0.0830 |
| 5.875353107 | 0.656 | 0.573 | 0.0830 |
| 5.894996746 | 0.652 | 0.569 | 0.0830 |
| 5.896694827 | 0.652 | 0.569 | 0.0830 |
| 5.91430632  | 0.649 | 0.566 | 0.0830 |
| 5.915063552 | 0.649 | 0.566 | 0.0830 |
| 6.012865062 | 0.628 | 0.545 | 0.0830 |
| 6.026065546 | 0.626 | 0.543 | 0.0830 |
| 6.027883027 | 0.625 | 0.542 | 0.0830 |
| 6.031140191 | 0.624 | 0.541 | 0.0830 |
| 6.032401941 | 0.624 | 0.541 | 0.0830 |

|             |       |       |        |
|-------------|-------|-------|--------|
| 6.055379898 | 0.619 | 0.536 | 0.0830 |
| 6.057768509 | 0.618 | 0.535 | 0.0830 |
| 6.058608845 | 0.618 | 0.535 | 0.0830 |
| 6.059714795 | 0.617 | 0.534 | 0.0830 |
| 6.06155303  | 0.617 | 0.534 | 0.0830 |
| 6.062746063 | 0.617 | 0.534 | 0.0830 |
| 6.063754128 | 0.617 | 0.534 | 0.0830 |
| 6.067041199 | 0.616 | 0.533 | 0.0830 |
| 6.070744902 | 0.616 | 0.533 | 0.0830 |
| 6.075011721 | 0.616 | 0.533 | 0.0830 |
| 6.076436222 | 0.616 | 0.533 | 0.0830 |
| 6.079772727 | 0.615 | 0.532 | 0.0830 |
| 6.080540541 | 0.615 | 0.532 | 0.0830 |
| 6.081476213 | 0.615 | 0.532 | 0.0830 |
| 6.082893714 | 0.615 | 0.532 | 0.0830 |
| 6.084126717 | 0.615 | 0.532 | 0.0830 |
| 6.085646936 | 0.615 | 0.532 | 0.0830 |
| 5.72491426  | 0.685 | 0.603 | 0.0820 |
| 5.725498646 | 0.685 | 0.603 | 0.0820 |
| 5.727224834 | 0.685 | 0.603 | 0.0820 |
| 5.732095697 | 0.684 | 0.602 | 0.0820 |
| 5.732908705 | 0.684 | 0.602 | 0.0820 |
| 5.743962047 | 0.682 | 0.6   | 0.0820 |
| 5.745268602 | 0.682 | 0.6   | 0.0820 |
| 5.746491395 | 0.682 | 0.6   | 0.0820 |
| 5.747814715 | 0.682 | 0.6   | 0.0820 |
| 5.752161079 | 0.681 | 0.599 | 0.0820 |
| 5.753056415 | 0.68  | 0.598 | 0.0820 |
| 5.753807301 | 0.68  | 0.598 | 0.0820 |
| 5.754453463 | 0.68  | 0.598 | 0.0820 |
| 5.755265467 | 0.68  | 0.598 | 0.0820 |
| 5.756694856 | 0.68  | 0.598 | 0.0820 |
| 5.759327987 | 0.679 | 0.597 | 0.0820 |
| 5.760541537 | 0.679 | 0.597 | 0.0820 |
| 5.764297386 | 0.678 | 0.596 | 0.0820 |
| 5.76556462  | 0.678 | 0.596 | 0.0820 |
| 5.768925965 | 0.678 | 0.596 | 0.0820 |
| 5.773502805 | 0.677 | 0.595 | 0.0820 |
| 5.775024478 | 0.677 | 0.595 | 0.0820 |
| 5.775899293 | 0.677 | 0.595 | 0.0820 |
| 5.777087647 | 0.676 | 0.594 | 0.0820 |
| 5.778499278 | 0.676 | 0.594 | 0.0820 |
| 5.7797838   | 0.676 | 0.594 | 0.0820 |

|             |       |       |        |
|-------------|-------|-------|--------|
| 5.781451821 | 0.675 | 0.593 | 0.0820 |
| 5.782722728 | 0.675 | 0.593 | 0.0820 |
| 5.855808375 | 0.661 | 0.579 | 0.0820 |
| 5.856748224 | 0.661 | 0.579 | 0.0820 |
| 5.858507734 | 0.661 | 0.579 | 0.0820 |
| 5.860970788 | 0.66  | 0.578 | 0.0820 |
| 5.862971656 | 0.66  | 0.578 | 0.0820 |
| 5.898358236 | 0.651 | 0.569 | 0.0820 |
| 5.899950847 | 0.651 | 0.569 | 0.0820 |
| 5.901130231 | 0.651 | 0.569 | 0.0820 |
| 5.902208561 | 0.651 | 0.569 | 0.0820 |
| 5.904144794 | 0.651 | 0.569 | 0.0820 |
| 5.907761829 | 0.65  | 0.568 | 0.0820 |
| 5.910520297 | 0.65  | 0.568 | 0.0820 |
| 5.912179222 | 0.649 | 0.567 | 0.0820 |
| 5.913193627 | 0.649 | 0.567 | 0.0820 |
| 5.915861662 | 0.648 | 0.566 | 0.0820 |
| 5.916695065 | 0.648 | 0.566 | 0.0820 |
| 5.684192372 | 0.692 | 0.61  | 0.0820 |
| 6.013528955 | 0.627 | 0.545 | 0.0820 |
| 6.014511804 | 0.627 | 0.545 | 0.0820 |
| 6.015331297 | 0.627 | 0.545 | 0.0820 |
| 6.025242873 | 0.626 | 0.544 | 0.0820 |
| 6.026943663 | 0.625 | 0.543 | 0.0820 |
| 6.02889028  | 0.624 | 0.542 | 0.0820 |
| 6.029781259 | 0.624 | 0.542 | 0.0820 |
| 6.030342552 | 0.624 | 0.542 | 0.0820 |
| 6.033288702 | 0.623 | 0.541 | 0.0820 |
| 6.034001156 | 0.623 | 0.541 | 0.0820 |
| 6.034992859 | 0.623 | 0.541 | 0.0820 |
| 6.036044162 | 0.623 | 0.541 | 0.0820 |
| 6.037160607 | 0.623 | 0.541 | 0.0820 |
| 6.040967562 | 0.622 | 0.54  | 0.0820 |
| 6.042416067 | 0.621 | 0.539 | 0.0820 |
| 6.043560756 | 0.621 | 0.539 | 0.0820 |
| 6.048145644 | 0.62  | 0.538 | 0.0820 |
| 6.048884906 | 0.62  | 0.538 | 0.0820 |
| 6.050169065 | 0.62  | 0.538 | 0.0820 |
| 6.051118733 | 0.619 | 0.537 | 0.0820 |
| 6.051956815 | 0.619 | 0.537 | 0.0820 |
| 6.053526674 | 0.619 | 0.537 | 0.0820 |
| 6.056740443 | 0.618 | 0.536 | 0.0820 |
| 6.077677225 | 0.615 | 0.533 | 0.0820 |

|             |       |       |        |
|-------------|-------|-------|--------|
| 6.078988414 | 0.615 | 0.533 | 0.0820 |
| 5.705701913 | 0.687 | 0.606 | 0.0810 |
| 5.710084034 | 0.687 | 0.606 | 0.0810 |
| 5.714285714 | 0.687 | 0.606 | 0.0810 |
| 5.749251497 | 0.681 | 0.6   | 0.0810 |
| 5.750816993 | 0.681 | 0.6   | 0.0810 |
| 5.758369031 | 0.679 | 0.598 | 0.0810 |
| 5.780468769 | 0.675 | 0.594 | 0.0810 |
| 5.784423408 | 0.674 | 0.593 | 0.0810 |
| 5.787593985 | 0.674 | 0.593 | 0.0810 |
| 5.789473684 | 0.674 | 0.593 | 0.0810 |
| 5.790911705 | 0.673 | 0.592 | 0.0810 |
| 5.792516327 | 0.673 | 0.592 | 0.0810 |
| 5.855092719 | 0.661 | 0.58  | 0.0810 |
| 5.90577604  | 0.65  | 0.569 | 0.0810 |
| 5.906236508 | 0.65  | 0.569 | 0.0810 |
| 5.917763555 | 0.647 | 0.566 | 0.0810 |
| 5.918953788 | 0.647 | 0.566 | 0.0810 |
| 5.920296431 | 0.647 | 0.566 | 0.0810 |
| 5.925048271 | 0.646 | 0.565 | 0.0810 |
| 5.925925926 | 0.646 | 0.565 | 0.0810 |
| 5.932768362 | 0.644 | 0.563 | 0.0810 |
| 5.570949185 | 0.712 | 0.631 | 0.0810 |
| 5.573144788 | 0.711 | 0.63  | 0.0810 |
| 5.574241568 | 0.711 | 0.63  | 0.0810 |
| 5.57523511  | 0.711 | 0.63  | 0.0810 |
| 5.576340326 | 0.711 | 0.63  | 0.0810 |
| 5.665703276 | 0.696 | 0.615 | 0.0810 |
| 5.669446451 | 0.695 | 0.614 | 0.0810 |
| 5.6704174   | 0.695 | 0.614 | 0.0810 |
| 5.671186749 | 0.694 | 0.613 | 0.0810 |
| 5.672078205 | 0.694 | 0.613 | 0.0810 |
| 5.673136743 | 0.694 | 0.613 | 0.0810 |
| 5.673958084 | 0.694 | 0.613 | 0.0810 |
| 5.677251344 | 0.693 | 0.612 | 0.0810 |
| 5.67821585  | 0.693 | 0.612 | 0.0810 |
| 5.683256673 | 0.692 | 0.611 | 0.0810 |
| 5.685603008 | 0.691 | 0.61  | 0.0810 |
| 5.686887255 | 0.691 | 0.61  | 0.0810 |
| 5.688061377 | 0.691 | 0.61  | 0.0810 |
| 5.689138963 | 0.691 | 0.61  | 0.0810 |
| 5.690572267 | 0.69  | 0.609 | 0.0810 |
| 5.691898527 | 0.69  | 0.609 | 0.0810 |

|             |       |       |        |
|-------------|-------|-------|--------|
| 5.692869175 | 0.69  | 0.609 | 0.0810 |
| 5.693937551 | 0.69  | 0.609 | 0.0810 |
| 5.694904341 | 0.69  | 0.609 | 0.0810 |
| 5.695783385 | 0.69  | 0.609 | 0.0810 |
| 5.696586114 | 0.689 | 0.608 | 0.0810 |
| 5.697322058 | 0.689 | 0.608 | 0.0810 |
| 5.698299575 | 0.689 | 0.608 | 0.0810 |
| 5.701575042 | 0.689 | 0.608 | 0.0810 |
| 5.704913096 | 0.688 | 0.607 | 0.0810 |
| 5.705324839 | 0.688 | 0.607 | 0.0810 |
| 5.936491935 | 0.643 | 0.562 | 0.0810 |
| 6.011570358 | 0.628 | 0.547 | 0.0810 |
| 6.01208735  | 0.628 | 0.547 | 0.0810 |
| 6.012464083 | 0.628 | 0.547 | 0.0810 |
| 6.015942581 | 0.626 | 0.545 | 0.0810 |
| 6.019179805 | 0.626 | 0.545 | 0.0810 |
| 6.02274563  | 0.626 | 0.545 | 0.0810 |
| 6.024118267 | 0.626 | 0.545 | 0.0810 |
| 6.038348444 | 0.622 | 0.541 | 0.0810 |
| 6.039614748 | 0.622 | 0.541 | 0.0810 |
| 6.044576892 | 0.62  | 0.539 | 0.0810 |
| 6.045854684 | 0.62  | 0.539 | 0.0810 |
| 6.04720791  | 0.62  | 0.539 | 0.0810 |
| 6.088350056 | 0.613 | 0.532 | 0.0810 |
| 6.089984577 | 0.613 | 0.532 | 0.0810 |
| 6.090798061 | 0.613 | 0.532 | 0.0810 |
| 6.092042895 | 0.613 | 0.532 | 0.0810 |
| 5.793777361 | 0.672 | 0.592 | 0.0800 |
| 5.79516317  | 0.672 | 0.592 | 0.0800 |
| 5.796277997 | 0.672 | 0.592 | 0.0800 |
| 5.797959009 | 0.672 | 0.592 | 0.0800 |
| 5.799408284 | 0.672 | 0.592 | 0.0800 |
| 5.820049813 | 0.668 | 0.588 | 0.0800 |
| 5.822070015 | 0.668 | 0.588 | 0.0800 |
| 5.822503516 | 0.668 | 0.588 | 0.0800 |
| 5.823157111 | 0.667 | 0.587 | 0.0800 |
| 5.823852618 | 0.667 | 0.587 | 0.0800 |
| 5.825995197 | 0.667 | 0.587 | 0.0800 |
| 5.828017714 | 0.667 | 0.587 | 0.0800 |
| 5.828396144 | 0.666 | 0.586 | 0.0800 |
| 5.830952381 | 0.666 | 0.586 | 0.0800 |
| 5.833333333 | 0.665 | 0.585 | 0.0800 |
| 5.835585586 | 0.665 | 0.585 | 0.0800 |

|             |       |       |        |
|-------------|-------|-------|--------|
| 5.837994063 | 0.665 | 0.585 | 0.0800 |
| 5.838717746 | 0.664 | 0.584 | 0.0800 |
| 5.839463087 | 0.664 | 0.584 | 0.0800 |
| 5.840792079 | 0.664 | 0.584 | 0.0800 |
| 5.844783236 | 0.663 | 0.583 | 0.0800 |
| 5.846202582 | 0.663 | 0.583 | 0.0800 |
| 5.847473876 | 0.663 | 0.583 | 0.0800 |
| 5.84850491  | 0.663 | 0.583 | 0.0800 |
| 5.850454228 | 0.662 | 0.582 | 0.0800 |
| 5.85206229  | 0.662 | 0.582 | 0.0800 |
| 5.854290408 | 0.661 | 0.581 | 0.0800 |
| 5.922309755 | 0.646 | 0.566 | 0.0800 |
| 5.923868748 | 0.646 | 0.566 | 0.0800 |
| 5.927034819 | 0.645 | 0.565 | 0.0800 |
| 5.928357571 | 0.645 | 0.565 | 0.0800 |
| 5.934408602 | 0.643 | 0.563 | 0.0800 |
| 5.467146283 | 0.73  | 0.65  | 0.0800 |
| 5.571973828 | 0.711 | 0.631 | 0.0800 |
| 5.577406262 | 0.71  | 0.63  | 0.0800 |
| 5.57806037  | 0.71  | 0.63  | 0.0800 |
| 5.57858933  | 0.71  | 0.63  | 0.0800 |
| 5.579328757 | 0.71  | 0.63  | 0.0800 |
| 5.579910321 | 0.71  | 0.63  | 0.0800 |
| 5.591751556 | 0.708 | 0.628 | 0.0800 |
| 5.592662801 | 0.708 | 0.628 | 0.0800 |
| 5.664537774 | 0.696 | 0.616 | 0.0800 |
| 5.667557932 | 0.695 | 0.615 | 0.0800 |
| 5.668619503 | 0.695 | 0.615 | 0.0800 |
| 5.67491649  | 0.693 | 0.613 | 0.0800 |
| 5.676379505 | 0.693 | 0.613 | 0.0800 |
| 5.679742859 | 0.692 | 0.612 | 0.0800 |
| 5.681145777 | 0.692 | 0.612 | 0.0800 |
| 5.681818182 | 0.692 | 0.612 | 0.0800 |
| 5.682439146 | 0.692 | 0.612 | 0.0800 |
| 5.704461669 | 0.688 | 0.608 | 0.0800 |
| 5.938293147 | 0.642 | 0.562 | 0.0800 |
| 5.939240117 | 0.642 | 0.562 | 0.0800 |
| 5.939621782 | 0.642 | 0.562 | 0.0800 |
| 5.940513047 | 0.642 | 0.562 | 0.0800 |
| 5.941602728 | 0.642 | 0.562 | 0.0800 |
| 5.96213569  | 0.638 | 0.558 | 0.0800 |
| 5.96329417  | 0.638 | 0.558 | 0.0800 |
| 5.966825513 | 0.637 | 0.557 | 0.0800 |

|             |       |       |        |
|-------------|-------|-------|--------|
| 5.967741935 | 0.637 | 0.557 | 0.0800 |
| 5.968367092 | 0.637 | 0.557 | 0.0800 |
| 5.970107635 | 0.637 | 0.557 | 0.0800 |
| 5.976992496 | 0.634 | 0.554 | 0.0800 |
| 5.978244805 | 0.634 | 0.554 | 0.0800 |
| 5.981543974 | 0.634 | 0.554 | 0.0800 |
| 5.985658476 | 0.633 | 0.553 | 0.0800 |
| 5.987457734 | 0.632 | 0.552 | 0.0800 |
| 6.005617978 | 0.628 | 0.548 | 0.0800 |
| 6.093232616 | 0.612 | 0.532 | 0.0800 |
| 6.094212278 | 0.612 | 0.532 | 0.0800 |
| 6.095282484 | 0.612 | 0.532 | 0.0800 |
| 6.096725693 | 0.611 | 0.531 | 0.0800 |
| 6.098425878 | 0.611 | 0.531 | 0.0800 |
| 6.099959855 | 0.611 | 0.531 | 0.0800 |
| 6.106066693 | 0.61  | 0.53  | 0.0800 |
| 5.800763359 | 0.671 | 0.592 | 0.0790 |
| 5.801997927 | 0.671 | 0.592 | 0.0790 |
| 5.80333247  | 0.671 | 0.592 | 0.0790 |
| 5.804396753 | 0.671 | 0.592 | 0.0790 |
| 5.807417423 | 0.67  | 0.591 | 0.0790 |
| 5.80981717  | 0.669 | 0.59  | 0.0790 |
| 5.811655405 | 0.669 | 0.59  | 0.0790 |
| 5.813226744 | 0.669 | 0.59  | 0.0790 |
| 5.813953488 | 0.669 | 0.59  | 0.0790 |
| 5.815473476 | 0.668 | 0.589 | 0.0790 |
| 5.817587641 | 0.668 | 0.589 | 0.0790 |
| 5.838329803 | 0.664 | 0.585 | 0.0790 |
| 5.842478826 | 0.663 | 0.584 | 0.0790 |
| 5.843764669 | 0.663 | 0.584 | 0.0790 |
| 5.852965632 | 0.661 | 0.582 | 0.0790 |
| 5.929401993 | 0.644 | 0.565 | 0.0790 |
| 5.93063352  | 0.644 | 0.565 | 0.0790 |
| 5.931203516 | 0.644 | 0.565 | 0.0790 |
| 5.931787969 | 0.644 | 0.565 | 0.0790 |
| 5.411361805 | 0.742 | 0.663 | 0.0790 |
| 5.41264927  | 0.742 | 0.663 | 0.0790 |
| 5.413773287 | 0.742 | 0.663 | 0.0790 |
| 5.41783054  | 0.74  | 0.661 | 0.0790 |
| 5.419420871 | 0.74  | 0.661 | 0.0790 |
| 5.420767038 | 0.74  | 0.661 | 0.0790 |
| 5.422110979 | 0.74  | 0.661 | 0.0790 |
| 5.423132012 | 0.74  | 0.661 | 0.0790 |



|             |       |       |        |
|-------------|-------|-------|--------|
| 5.425279041 | 0.739 | 0.66  | 0.0790 |
| 5.426982473 | 0.739 | 0.66  | 0.0790 |
| 5.427853553 | 0.739 | 0.66  | 0.0790 |
| 5.435340022 | 0.737 | 0.658 | 0.0790 |
| 5.436069523 | 0.737 | 0.658 | 0.0790 |
| 5.436870805 | 0.737 | 0.658 | 0.0790 |
| 5.449269999 | 0.734 | 0.655 | 0.0790 |
| 5.449586826 | 0.734 | 0.655 | 0.0790 |
| 5.449867725 | 0.734 | 0.655 | 0.0790 |
| 5.456864564 | 0.733 | 0.654 | 0.0790 |
| 5.465351662 | 0.731 | 0.652 | 0.0790 |
| 5.466252588 | 0.73  | 0.651 | 0.0790 |
| 5.467803097 | 0.729 | 0.65  | 0.0790 |
| 5.468365148 | 0.729 | 0.65  | 0.0790 |
| 5.46918163  | 0.729 | 0.65  | 0.0790 |
| 5.470100747 | 0.729 | 0.65  | 0.0790 |
| 5.472335543 | 0.728 | 0.649 | 0.0790 |
| 5.473328592 | 0.728 | 0.649 | 0.0790 |
| 5.474272273 | 0.728 | 0.649 | 0.0790 |
| 5.475525406 | 0.728 | 0.649 | 0.0790 |
| 5.482899339 | 0.727 | 0.648 | 0.0790 |
| 5.48465393  | 0.727 | 0.648 | 0.0790 |
| 5.485912698 | 0.726 | 0.647 | 0.0790 |
| 5.492957746 | 0.725 | 0.646 | 0.0790 |
| 5.493392453 | 0.725 | 0.646 | 0.0790 |
| 5.495005183 | 0.725 | 0.646 | 0.0790 |
| 5.496882383 | 0.724 | 0.645 | 0.0790 |
| 5.498538012 | 0.724 | 0.645 | 0.0790 |
| 5.508501713 | 0.722 | 0.643 | 0.0790 |
| 5.509593059 | 0.722 | 0.643 | 0.0790 |
| 5.510783859 | 0.722 | 0.643 | 0.0790 |
| 5.512092075 | 0.722 | 0.643 | 0.0790 |
| 5.513167013 | 0.721 | 0.642 | 0.0790 |
| 5.514109698 | 0.721 | 0.642 | 0.0790 |
| 5.514928699 | 0.721 | 0.642 | 0.0790 |
| 5.516196447 | 0.721 | 0.642 | 0.0790 |
| 5.569241264 | 0.712 | 0.633 | 0.0790 |
| 5.570045026 | 0.712 | 0.633 | 0.0790 |
| 5.580752923 | 0.709 | 0.63  | 0.0790 |
| 5.582108717 | 0.709 | 0.63  | 0.0790 |
| 5.586325439 | 0.708 | 0.629 | 0.0790 |
| 5.589148703 | 0.708 | 0.629 | 0.0790 |
| 5.590729981 | 0.708 | 0.629 | 0.0790 |

|             |       |       |        |
|-------------|-------|-------|--------|
| 5.593812967 | 0.707 | 0.628 | 0.0790 |
| 5.595130258 | 0.707 | 0.628 | 0.0790 |
| 5.5966696   | 0.707 | 0.628 | 0.0790 |
| 5.597655182 | 0.706 | 0.627 | 0.0790 |
| 5.598913043 | 0.706 | 0.627 | 0.0790 |
| 5.601204819 | 0.706 | 0.627 | 0.0790 |
| 5.604745573 | 0.705 | 0.626 | 0.0790 |
| 5.623150888 | 0.703 | 0.624 | 0.0790 |
| 5.625       | 0.703 | 0.624 | 0.0790 |
| 5.64331494  | 0.699 | 0.62  | 0.0790 |
| 5.644666535 | 0.699 | 0.62  | 0.0790 |
| 5.646110057 | 0.699 | 0.62  | 0.0790 |
| 5.647956893 | 0.699 | 0.62  | 0.0790 |
| 5.663493133 | 0.696 | 0.617 | 0.0790 |
| 5.942443064 | 0.641 | 0.562 | 0.0790 |
| 5.943456543 | 0.641 | 0.562 | 0.0790 |
| 5.944250194 | 0.641 | 0.562 | 0.0790 |
| 5.945195195 | 0.641 | 0.562 | 0.0790 |
| 5.946657183 | 0.641 | 0.562 | 0.0790 |
| 5.94754042  | 0.641 | 0.562 | 0.0790 |
| 5.950143667 | 0.64  | 0.561 | 0.0790 |
| 5.951650599 | 0.64  | 0.561 | 0.0790 |
| 5.953069089 | 0.64  | 0.561 | 0.0790 |
| 5.956251494 | 0.639 | 0.56  | 0.0790 |
| 5.958175459 | 0.639 | 0.56  | 0.0790 |
| 5.959584505 | 0.638 | 0.559 | 0.0790 |
| 5.960428017 | 0.638 | 0.559 | 0.0790 |
| 5.961064797 | 0.638 | 0.559 | 0.0790 |
| 5.964882256 | 0.637 | 0.558 | 0.0790 |
| 5.971722622 | 0.636 | 0.557 | 0.0790 |
| 5.972688292 | 0.636 | 0.557 | 0.0790 |
| 5.973590168 | 0.635 | 0.556 | 0.0790 |
| 5.974434371 | 0.635 | 0.556 | 0.0790 |
| 5.975226262 | 0.635 | 0.556 | 0.0790 |
| 5.975970559 | 0.634 | 0.555 | 0.0790 |
| 5.984550227 | 0.633 | 0.554 | 0.0790 |
| 5.985124972 | 0.633 | 0.554 | 0.0790 |
| 5.986378799 | 0.632 | 0.553 | 0.0790 |
| 5.987051626 | 0.632 | 0.553 | 0.0790 |
| 5.987839137 | 0.631 | 0.552 | 0.0790 |
| 5.988198023 | 0.631 | 0.552 | 0.0790 |
| 5.988536329 | 0.631 | 0.552 | 0.0790 |
| 6.101161923 | 0.61  | 0.531 | 0.0790 |

|             |       |       |        |
|-------------|-------|-------|--------|
| 6.102129509 | 0.61  | 0.531 | 0.0790 |
| 6.103230103 | 0.61  | 0.531 | 0.0790 |
| 6.104273633 | 0.61  | 0.531 | 0.0790 |
| 6.10495716  | 0.61  | 0.531 | 0.0790 |
| 6.10712639  | 0.609 | 0.53  | 0.0790 |
| 6.107583491 | 0.609 | 0.53  | 0.0790 |
| 6.109447771 | 0.609 | 0.53  | 0.0790 |
| 6.111111111 | 0.609 | 0.53  | 0.0790 |
| 6.112698413 | 0.608 | 0.529 | 0.0790 |
| 6.114467698 | 0.608 | 0.529 | 0.0790 |
| 6.114878798 | 0.608 | 0.529 | 0.0790 |
| 6.116377486 | 0.608 | 0.529 | 0.0790 |
| 5.805524657 | 0.67  | 0.592 | 0.0780 |
| 5.806451613 | 0.67  | 0.592 | 0.0780 |
| 5.808603381 | 0.669 | 0.591 | 0.0780 |
| 5.403012779 | 0.744 | 0.666 | 0.0780 |
| 5.404566057 | 0.743 | 0.665 | 0.0780 |
| 5.41418869  | 0.741 | 0.663 | 0.0780 |
| 5.415515654 | 0.741 | 0.663 | 0.0780 |
| 5.416666667 | 0.741 | 0.663 | 0.0780 |
| 5.429339478 | 0.738 | 0.66  | 0.0780 |
| 5.430285552 | 0.738 | 0.66  | 0.0780 |
| 5.431281171 | 0.738 | 0.66  | 0.0780 |
| 5.432584816 | 0.737 | 0.659 | 0.0780 |
| 5.433298439 | 0.737 | 0.659 | 0.0780 |
| 5.43415431  | 0.737 | 0.659 | 0.0780 |
| 5.438048246 | 0.736 | 0.658 | 0.0780 |
| 5.439078465 | 0.736 | 0.658 | 0.0780 |
| 5.440368455 | 0.736 | 0.658 | 0.0780 |
| 5.441676671 | 0.736 | 0.658 | 0.0780 |
| 5.443412478 | 0.735 | 0.657 | 0.0780 |
| 5.44440658  | 0.735 | 0.657 | 0.0780 |
| 5.446393686 | 0.735 | 0.657 | 0.0780 |
| 5.448018528 | 0.735 | 0.657 | 0.0780 |
| 5.448496905 | 0.734 | 0.656 | 0.0780 |
| 5.448909873 | 0.734 | 0.656 | 0.0780 |
| 5.452272727 | 0.733 | 0.655 | 0.0780 |
| 5.454545455 | 0.733 | 0.655 | 0.0780 |
| 5.459476894 | 0.732 | 0.654 | 0.0780 |
| 5.459946407 | 0.732 | 0.654 | 0.0780 |
| 5.460324508 | 0.732 | 0.654 | 0.0780 |
| 5.460759612 | 0.732 | 0.654 | 0.0780 |
| 5.465712777 | 0.73  | 0.652 | 0.0780 |

|             |       |       |        |
|-------------|-------|-------|--------|
| 5.471143174 | 0.728 | 0.65  | 0.0780 |
| 5.477821265 | 0.727 | 0.649 | 0.0780 |
| 5.479839022 | 0.727 | 0.649 | 0.0780 |
| 5.48107685  | 0.727 | 0.649 | 0.0780 |
| 5.485575589 | 0.726 | 0.648 | 0.0780 |
| 5.486957995 | 0.725 | 0.647 | 0.0780 |
| 5.489000478 | 0.725 | 0.647 | 0.0780 |
| 5.491576912 | 0.725 | 0.647 | 0.0780 |
| 5.496435974 | 0.724 | 0.646 | 0.0780 |
| 5.50147929  | 0.723 | 0.645 | 0.0780 |
| 5.503157142 | 0.723 | 0.645 | 0.0780 |
| 5.503615837 | 0.723 | 0.645 | 0.0780 |
| 5.504746973 | 0.723 | 0.645 | 0.0780 |
| 5.505973546 | 0.723 | 0.645 | 0.0780 |
| 5.506787745 | 0.722 | 0.644 | 0.0780 |
| 5.507633884 | 0.722 | 0.644 | 0.0780 |
| 5.518360949 | 0.72  | 0.642 | 0.0780 |
| 5.520476456 | 0.72  | 0.642 | 0.0780 |
| 5.521930226 | 0.72  | 0.642 | 0.0780 |
| 5.522821937 | 0.72  | 0.642 | 0.0780 |
| 5.561813752 | 0.713 | 0.635 | 0.0780 |
| 5.562522042 | 0.713 | 0.635 | 0.0780 |
| 5.563147094 | 0.713 | 0.635 | 0.0780 |
| 5.583618835 | 0.708 | 0.63  | 0.0780 |
| 5.602623259 | 0.705 | 0.627 | 0.0780 |
| 5.603350807 | 0.705 | 0.627 | 0.0780 |
| 5.604130169 | 0.705 | 0.627 | 0.0780 |
| 5.606601825 | 0.704 | 0.626 | 0.0780 |
| 5.608286858 | 0.704 | 0.626 | 0.0780 |
| 5.609110853 | 0.704 | 0.626 | 0.0780 |
| 5.610433604 | 0.704 | 0.626 | 0.0780 |
| 5.612007168 | 0.704 | 0.626 | 0.0780 |
| 5.613938244 | 0.704 | 0.626 | 0.0780 |
| 5.615705809 | 0.704 | 0.626 | 0.0780 |
| 5.620676494 | 0.703 | 0.625 | 0.0780 |
| 5.621108404 | 0.703 | 0.625 | 0.0780 |
| 5.62670765  | 0.702 | 0.624 | 0.0780 |
| 5.628578908 | 0.702 | 0.624 | 0.0780 |
| 5.628940794 | 0.702 | 0.624 | 0.0780 |
| 5.629384351 | 0.701 | 0.623 | 0.0780 |
| 5.630906769 | 0.701 | 0.623 | 0.0780 |
| 5.63254765  | 0.701 | 0.623 | 0.0780 |
| 5.638340818 | 0.7   | 0.622 | 0.0780 |

|             |       |       |        |
|-------------|-------|-------|--------|
| 5.649102806 | 0.698 | 0.62  | 0.0780 |
| 5.649534082 | 0.698 | 0.62  | 0.0780 |
| 5.650945714 | 0.698 | 0.62  | 0.0780 |
| 5.654967159 | 0.697 | 0.619 | 0.0780 |
| 5.656533575 | 0.697 | 0.619 | 0.0780 |
| 5.659136048 | 0.697 | 0.619 | 0.0780 |
| 5.661071032 | 0.697 | 0.619 | 0.0780 |
| 5.662207654 | 0.696 | 0.618 | 0.0780 |
| 5.948539753 | 0.64  | 0.562 | 0.0780 |
| 5.953977849 | 0.639 | 0.561 | 0.0780 |
| 5.954627327 | 0.639 | 0.561 | 0.0780 |
| 5.989633301 | 0.63  | 0.552 | 0.0780 |
| 5.990778514 | 0.63  | 0.552 | 0.0780 |
| 5.995495495 | 0.63  | 0.552 | 0.0780 |
| 6.118034056 | 0.607 | 0.529 | 0.0780 |
| 6.118912019 | 0.607 | 0.529 | 0.0780 |
| 5.397276335 | 0.744 | 0.667 | 0.0770 |
| 5.398863636 | 0.744 | 0.667 | 0.0770 |
| 5.400534759 | 0.744 | 0.667 | 0.0770 |
| 5.401264686 | 0.744 | 0.667 | 0.0770 |
| 5.401879352 | 0.744 | 0.667 | 0.0770 |
| 5.406406406 | 0.742 | 0.665 | 0.0770 |
| 5.408106219 | 0.742 | 0.665 | 0.0770 |
| 5.409881968 | 0.742 | 0.665 | 0.0770 |
| 5.442607423 | 0.735 | 0.658 | 0.0770 |
| 5.462736891 | 0.731 | 0.654 | 0.0770 |
| 5.464798577 | 0.731 | 0.654 | 0.0770 |
| 5.523865669 | 0.719 | 0.642 | 0.0770 |
| 5.525395657 | 0.719 | 0.642 | 0.0770 |
| 5.52697699  | 0.719 | 0.642 | 0.0770 |
| 5.527794251 | 0.719 | 0.642 | 0.0770 |
| 5.552344252 | 0.714 | 0.637 | 0.0770 |
| 5.558526441 | 0.713 | 0.636 | 0.0770 |
| 5.563645028 | 0.712 | 0.635 | 0.0770 |
| 5.566045796 | 0.712 | 0.635 | 0.0770 |
| 5.568522047 | 0.712 | 0.635 | 0.0770 |
| 5.618438156 | 0.703 | 0.626 | 0.0770 |
| 5.633357105 | 0.7   | 0.623 | 0.0770 |
| 5.635083227 | 0.7   | 0.623 | 0.0770 |
| 5.636973764 | 0.7   | 0.623 | 0.0770 |
| 5.639316314 | 0.699 | 0.622 | 0.0770 |
| 5.640280262 | 0.699 | 0.622 | 0.0770 |
| 5.641741871 | 0.699 | 0.622 | 0.0770 |

|             |       |       |        |
|-------------|-------|-------|--------|
| 5.652173913 | 0.697 | 0.62  | 0.0770 |
| 5.653467909 | 0.697 | 0.62  | 0.0770 |
| 6.119810782 | 0.606 | 0.529 | 0.0770 |
| 6.12071535  | 0.606 | 0.529 | 0.0770 |
| 6.121353724 | 0.606 | 0.529 | 0.0770 |
| 6.121972153 | 0.606 | 0.529 | 0.0770 |
| 6.12999232  | 0.603 | 0.526 | 0.0770 |
| 6.131169621 | 0.603 | 0.526 | 0.0770 |
| 6.133893557 | 0.602 | 0.525 | 0.0770 |
| 6.134711553 | 0.602 | 0.525 | 0.0770 |
| 5.370899471 | 0.752 | 0.676 | 0.0760 |
| 5.389415973 | 0.747 | 0.671 | 0.0760 |
| 5.389840656 | 0.746 | 0.67  | 0.0760 |
| 5.39137054  | 0.746 | 0.67  | 0.0760 |
| 5.392964292 | 0.746 | 0.67  | 0.0760 |
| 5.39504284  | 0.745 | 0.669 | 0.0760 |
| 5.395516145 | 0.745 | 0.669 | 0.0760 |
| 5.395861529 | 0.745 | 0.669 | 0.0760 |
| 5.3964325   | 0.744 | 0.668 | 0.0760 |
| 5.528398232 | 0.718 | 0.642 | 0.0760 |
| 5.529128959 | 0.718 | 0.642 | 0.0760 |
| 5.530069011 | 0.718 | 0.642 | 0.0760 |
| 5.538601377 | 0.716 | 0.64  | 0.0760 |
| 5.540054443 | 0.716 | 0.64  | 0.0760 |
| 5.541784974 | 0.715 | 0.639 | 0.0760 |
| 5.542512909 | 0.715 | 0.639 | 0.0760 |
| 5.544866071 | 0.715 | 0.639 | 0.0760 |
| 5.547160128 | 0.715 | 0.639 | 0.0760 |
| 5.548956718 | 0.714 | 0.638 | 0.0760 |
| 6.123022243 | 0.605 | 0.529 | 0.0760 |
| 6.123813257 | 0.605 | 0.529 | 0.0760 |
| 6.124515504 | 0.605 | 0.529 | 0.0760 |
| 6.125327225 | 0.604 | 0.528 | 0.0760 |
| 6.126207507 | 0.604 | 0.528 | 0.0760 |
| 6.128099944 | 0.603 | 0.527 | 0.0760 |
| 6.131991773 | 0.602 | 0.526 | 0.0760 |
| 6.132965009 | 0.602 | 0.526 | 0.0760 |
| 6.135666481 | 0.601 | 0.525 | 0.0760 |
| 6.136363636 | 0.601 | 0.525 | 0.0760 |
| 6.137147335 | 0.601 | 0.525 | 0.0760 |
| 5.357997266 | 0.755 | 0.68  | 0.0750 |
| 5.358983848 | 0.755 | 0.68  | 0.0750 |
| 5.361882312 | 0.754 | 0.679 | 0.0750 |

|             |       |       |        |
|-------------|-------|-------|--------|
| 5.364410872 | 0.753 | 0.678 | 0.0750 |
| 5.365218496 | 0.753 | 0.678 | 0.0750 |
| 5.366542648 | 0.752 | 0.677 | 0.0750 |
| 5.368179578 | 0.752 | 0.677 | 0.0750 |
| 5.369748944 | 0.752 | 0.677 | 0.0750 |
| 5.371884498 | 0.751 | 0.676 | 0.0750 |
| 5.372737377 | 0.751 | 0.676 | 0.0750 |
| 5.373641994 | 0.751 | 0.676 | 0.0750 |
| 5.37457483  | 0.75  | 0.675 | 0.0750 |
| 5.375672043 | 0.75  | 0.675 | 0.0750 |
| 5.376614254 | 0.75  | 0.675 | 0.0750 |
| 5.37783615  | 0.75  | 0.675 | 0.0750 |
| 5.379267357 | 0.75  | 0.675 | 0.0750 |
| 5.386752137 | 0.747 | 0.672 | 0.0750 |
| 5.389055223 | 0.747 | 0.672 | 0.0750 |
| 5.39359891  | 0.745 | 0.67  | 0.0750 |
| 5.394338118 | 0.745 | 0.67  | 0.0750 |
| 5.394736842 | 0.745 | 0.67  | 0.0750 |
| 5.531320575 | 0.717 | 0.642 | 0.0750 |
| 5.531914894 | 0.717 | 0.642 | 0.0750 |
| 5.532624113 | 0.717 | 0.642 | 0.0750 |
| 5.533962264 | 0.717 | 0.642 | 0.0750 |
| 5.53515274  | 0.717 | 0.642 | 0.0750 |
| 5.536674347 | 0.716 | 0.641 | 0.0750 |
| 5.540970907 | 0.715 | 0.64  | 0.0750 |
| 5.54769523  | 0.714 | 0.639 | 0.0750 |
| 5.548166151 | 0.714 | 0.639 | 0.0750 |
| 5.548583792 | 0.714 | 0.639 | 0.0750 |
| 6.126964097 | 0.603 | 0.528 | 0.0750 |
| 6.13858577  | 0.6   | 0.525 | 0.0750 |
| 6.139795692 | 0.6   | 0.525 | 0.0750 |
| 5.323627985 | 0.761 | 0.687 | 0.0740 |
| 5.325381141 | 0.761 | 0.687 | 0.0740 |
| 5.339373464 | 0.758 | 0.684 | 0.0740 |
| 5.341261999 | 0.758 | 0.684 | 0.0740 |
| 5.34204033  | 0.758 | 0.684 | 0.0740 |
| 5.359296573 | 0.754 | 0.68  | 0.0740 |
| 5.360461454 | 0.754 | 0.68  | 0.0740 |
| 5.362723666 | 0.753 | 0.679 | 0.0740 |
| 5.363683451 | 0.753 | 0.679 | 0.0740 |
| 5.379931897 | 0.749 | 0.675 | 0.0740 |
| 5.380275871 | 0.749 | 0.675 | 0.0740 |
| 5.380693582 | 0.748 | 0.674 | 0.0740 |

|             |       |       |        |
|-------------|-------|-------|--------|
| 5.382783883 | 0.748 | 0.674 | 0.0740 |
| 5.384615385 | 0.748 | 0.674 | 0.0740 |
| 6.140827613 | 0.599 | 0.525 | 0.0740 |
| 6.141518316 | 0.599 | 0.525 | 0.0740 |
| 6.141932132 | 0.599 | 0.525 | 0.0740 |
| 5.314485514 | 0.762 | 0.689 | 0.0730 |
| 5.315570505 | 0.762 | 0.689 | 0.0730 |
| 5.327277055 | 0.76  | 0.687 | 0.0730 |
| 5.328707261 | 0.76  | 0.687 | 0.0730 |
| 5.329144343 | 0.76  | 0.687 | 0.0730 |
| 5.329505824 | 0.759 | 0.686 | 0.0730 |
| 5.331501832 | 0.759 | 0.686 | 0.0730 |
| 5.335060449 | 0.758 | 0.685 | 0.0730 |
| 5.336933108 | 0.758 | 0.685 | 0.0730 |
| 5.337458245 | 0.758 | 0.685 | 0.0730 |
| 5.342988602 | 0.757 | 0.684 | 0.0730 |
| 5.343713397 | 0.757 | 0.684 | 0.0730 |
| 5.344913647 | 0.757 | 0.684 | 0.0730 |
| 5.346567086 | 0.757 | 0.684 | 0.0730 |
| 5.352526926 | 0.756 | 0.683 | 0.0730 |
| 5.356296547 | 0.755 | 0.682 | 0.0730 |
| 6.142494561 | 0.598 | 0.525 | 0.0730 |
| 6.143323996 | 0.598 | 0.525 | 0.0730 |
| 6.144184581 | 0.598 | 0.525 | 0.0730 |
| 6.144914855 | 0.598 | 0.525 | 0.0730 |
| 6.146699772 | 0.598 | 0.525 | 0.0730 |
| 6.234931009 | 0.58  | 0.507 | 0.0730 |
| 6.235624587 | 0.579 | 0.506 | 0.0730 |
| 6.237977528 | 0.579 | 0.506 | 0.0730 |
| 6.240300752 | 0.579 | 0.506 | 0.0730 |
| 6.240868128 | 0.579 | 0.506 | 0.0730 |
| 6.242231229 | 0.578 | 0.505 | 0.0730 |
| 5.309493401 | 0.763 | 0.691 | 0.0720 |
| 5.310539645 | 0.762 | 0.69  | 0.0720 |
| 5.311617232 | 0.762 | 0.69  | 0.0720 |
| 5.313254831 | 0.762 | 0.69  | 0.0720 |
| 5.314147688 | 0.762 | 0.69  | 0.0720 |
| 5.318778307 | 0.761 | 0.689 | 0.0720 |
| 5.321840781 | 0.761 | 0.689 | 0.0720 |
| 5.348029716 | 0.756 | 0.684 | 0.0720 |
| 5.34957784  | 0.756 | 0.684 | 0.0720 |
| 5.351215574 | 0.756 | 0.684 | 0.0720 |
| 5.353238265 | 0.755 | 0.683 | 0.0720 |



|             |       |       |        |
|-------------|-------|-------|--------|
| 5.353933031 | 0.755 | 0.683 | 0.0720 |
| 5.354584709 | 0.755 | 0.683 | 0.0720 |
| 5.355014983 | 0.755 | 0.683 | 0.0720 |
| 5.355320747 | 0.755 | 0.683 | 0.0720 |
| 6.148398398 | 0.597 | 0.525 | 0.0720 |
| 6.148858486 | 0.597 | 0.525 | 0.0720 |
| 6.163156355 | 0.594 | 0.522 | 0.0720 |
| 6.163952787 | 0.594 | 0.522 | 0.0720 |
| 6.168992699 | 0.593 | 0.521 | 0.0720 |
| 6.169683497 | 0.593 | 0.521 | 0.0720 |
| 6.171651786 | 0.592 | 0.52  | 0.0720 |
| 6.172357253 | 0.592 | 0.52  | 0.0720 |
| 6.173668075 | 0.591 | 0.519 | 0.0720 |
| 6.175483616 | 0.591 | 0.519 | 0.0720 |
| 6.191829004 | 0.588 | 0.516 | 0.0720 |
| 6.193365103 | 0.588 | 0.516 | 0.0720 |
| 6.220221214 | 0.583 | 0.511 | 0.0720 |
| 6.221576227 | 0.583 | 0.511 | 0.0720 |
| 6.222999223 | 0.583 | 0.511 | 0.0720 |
| 6.224470893 | 0.583 | 0.511 | 0.0720 |
| 6.229039813 | 0.582 | 0.51  | 0.0720 |
| 6.233321473 | 0.58  | 0.508 | 0.0720 |
| 6.234167068 | 0.58  | 0.508 | 0.0720 |
| 6.241372745 | 0.578 | 0.506 | 0.0720 |
| 6.241824477 | 0.578 | 0.506 | 0.0720 |
| 6.242599404 | 0.577 | 0.505 | 0.0720 |
| 6.243080405 | 0.577 | 0.505 | 0.0720 |
| 6.246693122 | 0.577 | 0.505 | 0.0720 |
| 5.306692509 | 0.763 | 0.692 | 0.0710 |
| 5.307952273 | 0.763 | 0.692 | 0.0710 |
| 6.597930839 | 0.502 | 0.431 | 0.0710 |
| 6.605499439 | 0.5   | 0.429 | 0.0710 |
| 6.149246805 | 0.596 | 0.525 | 0.0710 |
| 6.151635721 | 0.596 | 0.525 | 0.0710 |
| 6.153846154 | 0.596 | 0.525 | 0.0710 |
| 6.155870445 | 0.595 | 0.524 | 0.0710 |
| 6.158215661 | 0.595 | 0.524 | 0.0710 |
| 6.158738491 | 0.595 | 0.524 | 0.0710 |
| 6.160791226 | 0.594 | 0.523 | 0.0710 |
| 6.16247643  | 0.594 | 0.523 | 0.0710 |
| 6.164898548 | 0.593 | 0.522 | 0.0710 |
| 6.1660401   | 0.593 | 0.522 | 0.0710 |
| 6.167748918 | 0.593 | 0.522 | 0.0710 |

|             |       |       |        |
|-------------|-------|-------|--------|
| 6.170820669 | 0.592 | 0.521 | 0.0710 |
| 6.17724053  | 0.59  | 0.519 | 0.0710 |
| 6.17817721  | 0.59  | 0.519 | 0.0710 |
| 6.179059615 | 0.59  | 0.519 | 0.0710 |
| 6.182512144 | 0.589 | 0.518 | 0.0710 |
| 6.183708317 | 0.589 | 0.518 | 0.0710 |
| 6.184590812 | 0.589 | 0.518 | 0.0710 |
| 6.193789119 | 0.587 | 0.516 | 0.0710 |
| 6.194841012 | 0.587 | 0.516 | 0.0710 |
| 6.195985596 | 0.587 | 0.516 | 0.0710 |
| 6.196751058 | 0.587 | 0.516 | 0.0710 |
| 6.198006754 | 0.587 | 0.516 | 0.0710 |
| 6.199973864 | 0.586 | 0.515 | 0.0710 |
| 6.201333853 | 0.586 | 0.515 | 0.0710 |
| 6.202379472 | 0.586 | 0.515 | 0.0710 |
| 6.203794059 | 0.586 | 0.515 | 0.0710 |
| 6.210165226 | 0.585 | 0.514 | 0.0710 |
| 6.211650668 | 0.585 | 0.514 | 0.0710 |
| 6.217082467 | 0.584 | 0.513 | 0.0710 |
| 6.218730457 | 0.583 | 0.512 | 0.0710 |
| 6.225790329 | 0.582 | 0.511 | 0.0710 |
| 6.227493261 | 0.582 | 0.511 | 0.0710 |
| 6.229508197 | 0.581 | 0.51  | 0.0710 |
| 6.230138714 | 0.581 | 0.51  | 0.0710 |
| 6.231326644 | 0.581 | 0.51  | 0.0710 |
| 6.232380385 | 0.581 | 0.51  | 0.0710 |
| 6.253078818 | 0.575 | 0.504 | 0.0710 |
| 5.297655271 | 0.764 | 0.694 | 0.0700 |
| 5.299279847 | 0.764 | 0.694 | 0.0700 |
| 5.300875634 | 0.764 | 0.694 | 0.0700 |
| 5.301609121 | 0.763 | 0.693 | 0.0700 |
| 5.302940413 | 0.763 | 0.693 | 0.0700 |
| 5.304372726 | 0.763 | 0.693 | 0.0700 |
| 5.305500249 | 0.763 | 0.693 | 0.0700 |
| 5.306122449 | 0.763 | 0.693 | 0.0700 |
| 6.58869129  | 0.504 | 0.434 | 0.0700 |
| 6.593804746 | 0.503 | 0.433 | 0.0700 |
| 6.59497379  | 0.503 | 0.433 | 0.0700 |
| 6.596483452 | 0.502 | 0.432 | 0.0700 |
| 6.599319728 | 0.501 | 0.431 | 0.0700 |
| 6.600653595 | 0.501 | 0.431 | 0.0700 |
| 6.601935646 | 0.5   | 0.43  | 0.0700 |
| 6.603168844 | 0.5   | 0.43  | 0.0700 |

|             |       |       |        |
|-------------|-------|-------|--------|
| 6.604355928 | 0.5   | 0.43  | 0.0700 |
| 6.606601732 | 0.499 | 0.429 | 0.0700 |
| 6.60816913  | 0.499 | 0.429 | 0.0700 |
| 6.610382825 | 0.499 | 0.429 | 0.0700 |
| 6.612236737 | 0.499 | 0.429 | 0.0700 |
| 6.61332992  | 0.499 | 0.429 | 0.0700 |
| 6.615701836 | 0.499 | 0.429 | 0.0700 |
| 6.618176047 | 0.498 | 0.428 | 0.0700 |
| 6.635217391 | 0.495 | 0.425 | 0.0700 |
| 6.642063406 | 0.494 | 0.424 | 0.0700 |
| 6.642596455 | 0.494 | 0.424 | 0.0700 |
| 6.70695195  | 0.482 | 0.412 | 0.0700 |
| 6.159180344 | 0.594 | 0.524 | 0.0700 |
| 6.180165418 | 0.589 | 0.519 | 0.0700 |
| 6.181186869 | 0.589 | 0.519 | 0.0700 |
| 6.186010729 | 0.588 | 0.518 | 0.0700 |
| 6.18727518  | 0.588 | 0.518 | 0.0700 |
| 6.188988095 | 0.588 | 0.518 | 0.0700 |
| 6.19047619  | 0.588 | 0.518 | 0.0700 |
| 6.205638057 | 0.585 | 0.515 | 0.0700 |
| 6.206896552 | 0.585 | 0.515 | 0.0700 |
| 6.20784388  | 0.585 | 0.515 | 0.0700 |
| 6.208970768 | 0.585 | 0.515 | 0.0700 |
| 6.212569482 | 0.584 | 0.514 | 0.0700 |
| 6.213651733 | 0.584 | 0.514 | 0.0700 |
| 6.215250965 | 0.584 | 0.514 | 0.0700 |
| 6.256570438 | 0.574 | 0.504 | 0.0700 |
| 6.257146591 | 0.574 | 0.504 | 0.0700 |
| 6.257489327 | 0.574 | 0.504 | 0.0700 |
| 6.257866614 | 0.574 | 0.504 | 0.0700 |
| 6.258283959 | 0.574 | 0.504 | 0.0700 |
| 6.259267395 | 0.573 | 0.503 | 0.0700 |
| 6.264714029 | 0.572 | 0.502 | 0.0700 |
| 6.265441513 | 0.572 | 0.502 | 0.0700 |
| 6.266244726 | 0.572 | 0.502 | 0.0700 |
| 6.26713615  | 0.571 | 0.501 | 0.0700 |
| 6.281269543 | 0.569 | 0.499 | 0.0700 |
| 6.295206972 | 0.566 | 0.496 | 0.0700 |
| 5.290510128 | 0.765 | 0.696 | 0.0690 |
| 5.290851483 | 0.765 | 0.696 | 0.0690 |
| 5.295707472 | 0.764 | 0.695 | 0.0690 |
| 6.564651337 | 0.509 | 0.44  | 0.0690 |
| 6.587063967 | 0.504 | 0.435 | 0.0690 |

|             |       |       |        |
|-------------|-------|-------|--------|
| 6.587768441 | 0.504 | 0.435 | 0.0690 |
| 6.590028189 | 0.503 | 0.434 | 0.0690 |
| 6.591750842 | 0.503 | 0.434 | 0.0690 |
| 6.592999593 | 0.503 | 0.434 | 0.0690 |
| 6.618876328 | 0.497 | 0.428 | 0.0690 |
| 6.619382964 | 0.497 | 0.428 | 0.0690 |
| 6.620203983 | 0.497 | 0.428 | 0.0690 |
| 6.621155638 | 0.496 | 0.427 | 0.0690 |
| 6.622069089 | 0.496 | 0.427 | 0.0690 |
| 6.62294659  | 0.496 | 0.427 | 0.0690 |
| 6.623790223 | 0.496 | 0.427 | 0.0690 |
| 6.627562956 | 0.495 | 0.426 | 0.0690 |
| 6.628239203 | 0.495 | 0.426 | 0.0690 |
| 6.628892456 | 0.495 | 0.426 | 0.0690 |
| 6.629824133 | 0.495 | 0.426 | 0.0690 |
| 6.6403125   | 0.494 | 0.425 | 0.0690 |
| 6.640923187 | 0.494 | 0.425 | 0.0690 |
| 6.641506209 | 0.494 | 0.425 | 0.0690 |
| 6.643106893 | 0.493 | 0.424 | 0.0690 |
| 6.657032755 | 0.49  | 0.421 | 0.0690 |
| 6.666666667 | 0.49  | 0.421 | 0.0690 |
| 6.687905844 | 0.484 | 0.415 | 0.0690 |
| 6.688526705 | 0.484 | 0.415 | 0.0690 |
| 6.688965456 | 0.484 | 0.415 | 0.0690 |
| 6.689422181 | 0.484 | 0.415 | 0.0690 |
| 6.690911976 | 0.483 | 0.414 | 0.0690 |
| 6.691452897 | 0.483 | 0.414 | 0.0690 |
| 6.704228035 | 0.482 | 0.413 | 0.0690 |
| 6.705213904 | 0.482 | 0.413 | 0.0690 |
| 6.70623459  | 0.482 | 0.413 | 0.0690 |
| 6.707695804 | 0.481 | 0.412 | 0.0690 |
| 6.708467647 | 0.481 | 0.412 | 0.0690 |
| 6.709269089 | 0.481 | 0.412 | 0.0690 |
| 6.710101868 | 0.481 | 0.412 | 0.0690 |
| 6.71280774  | 0.48  | 0.411 | 0.0690 |
| 6.713786214 | 0.479 | 0.41  | 0.0690 |
| 6.716987581 | 0.478 | 0.409 | 0.0690 |
| 6.718153626 | 0.478 | 0.409 | 0.0690 |
| 6.728977405 | 0.477 | 0.408 | 0.0690 |
| 6.258748104 | 0.573 | 0.504 | 0.0690 |
| 6.259852293 | 0.572 | 0.503 | 0.0690 |
| 6.262265209 | 0.572 | 0.503 | 0.0690 |
| 6.268131175 | 0.57  | 0.501 | 0.0690 |

|             |       |       |        |
|-------------|-------|-------|--------|
| 6.270423033 | 0.57  | 0.501 | 0.0690 |
| 6.272740637 | 0.57  | 0.501 | 0.0690 |
| 6.279778786 | 0.569 | 0.5   | 0.0690 |
| 6.282917533 | 0.568 | 0.499 | 0.0690 |
| 6.284749035 | 0.568 | 0.499 | 0.0690 |
| 6.289815378 | 0.567 | 0.498 | 0.0690 |
| 6.290856655 | 0.567 | 0.498 | 0.0690 |
| 6.29391197  | 0.566 | 0.497 | 0.0690 |
| 6.297498797 | 0.565 | 0.496 | 0.0690 |
| 6.298956949 | 0.565 | 0.496 | 0.0690 |
| 6.299895317 | 0.565 | 0.496 | 0.0690 |
| 6.300973949 | 0.565 | 0.496 | 0.0690 |
| 6.303173919 | 0.564 | 0.495 | 0.0690 |
| 6.303832681 | 0.564 | 0.495 | 0.0690 |
| 6.307255245 | 0.563 | 0.494 | 0.0690 |
| 6.30820857  | 0.563 | 0.494 | 0.0690 |
| 5.287657219 | 0.765 | 0.697 | 0.0680 |
| 5.288906594 | 0.765 | 0.697 | 0.0680 |
| 5.290088827 | 0.765 | 0.697 | 0.0680 |
| 5.292561469 | 0.764 | 0.696 | 0.0680 |
| 5.294117647 | 0.764 | 0.696 | 0.0680 |
| 6.309124321 | 0.562 | 0.494 | 0.0680 |
| 6.309842119 | 0.562 | 0.494 | 0.0680 |
| 6.311108583 | 0.562 | 0.494 | 0.0680 |
| 6.313923106 | 0.562 | 0.494 | 0.0680 |
| 6.342724868 | 0.557 | 0.489 | 0.0680 |
| 6.348255869 | 0.556 | 0.488 | 0.0680 |
| 6.349785656 | 0.556 | 0.488 | 0.0680 |
| 6.355042017 | 0.554 | 0.486 | 0.0680 |
| 6.516491482 | 0.518 | 0.45  | 0.0680 |
| 6.517686226 | 0.518 | 0.45  | 0.0680 |
| 6.51875293  | 0.518 | 0.45  | 0.0680 |
| 6.550509956 | 0.512 | 0.444 | 0.0680 |
| 6.552889096 | 0.511 | 0.443 | 0.0680 |
| 6.554337951 | 0.51  | 0.442 | 0.0680 |
| 6.556531704 | 0.51  | 0.442 | 0.0680 |
| 6.561504777 | 0.509 | 0.441 | 0.0680 |
| 6.563458589 | 0.509 | 0.441 | 0.0680 |
| 6.565575278 | 0.508 | 0.44  | 0.0680 |
| 6.56671462  | 0.508 | 0.44  | 0.0680 |
| 6.570598007 | 0.507 | 0.439 | 0.0680 |
| 6.575959521 | 0.506 | 0.438 | 0.0680 |
| 6.585338639 | 0.504 | 0.436 | 0.0680 |

|             |       |       |        |
|-------------|-------|-------|--------|
| 6.624601911 | 0.495 | 0.427 | 0.0680 |
| 6.625383436 | 0.495 | 0.427 | 0.0680 |
| 6.626492903 | 0.495 | 0.427 | 0.0680 |
| 6.64359613  | 0.492 | 0.424 | 0.0680 |
| 6.644065459 | 0.492 | 0.424 | 0.0680 |
| 6.646882705 | 0.49  | 0.422 | 0.0680 |
| 6.647228834 | 0.49  | 0.422 | 0.0680 |
| 6.6765286   | 0.485 | 0.417 | 0.0680 |
| 6.68656876  | 0.485 | 0.417 | 0.0680 |
| 6.686931776 | 0.485 | 0.417 | 0.0680 |
| 6.690151327 | 0.483 | 0.415 | 0.0680 |
| 6.692018508 | 0.482 | 0.414 | 0.0680 |
| 6.69292804  | 0.482 | 0.414 | 0.0680 |
| 6.698729501 | 0.482 | 0.414 | 0.0680 |
| 6.710967856 | 0.48  | 0.412 | 0.0680 |
| 6.711869082 | 0.48  | 0.412 | 0.0680 |
| 6.714807091 | 0.478 | 0.41  | 0.0680 |
| 6.715873189 | 0.478 | 0.41  | 0.0680 |
| 6.721443966 | 0.477 | 0.409 | 0.0680 |
| 6.725705329 | 0.477 | 0.409 | 0.0680 |
| 6.727833895 | 0.477 | 0.409 | 0.0680 |
| 6.73016449  | 0.476 | 0.408 | 0.0680 |
| 6.731397687 | 0.476 | 0.408 | 0.0680 |
| 6.734013605 | 0.475 | 0.407 | 0.0680 |
| 6.773172724 | 0.466 | 0.398 | 0.0680 |
| 6.774193548 | 0.466 | 0.398 | 0.0680 |
| 6.273900865 | 0.569 | 0.501 | 0.0680 |
| 6.275185936 | 0.569 | 0.501 | 0.0680 |
| 6.276617166 | 0.569 | 0.501 | 0.0680 |
| 6.278221015 | 0.569 | 0.501 | 0.0680 |
| 6.286796537 | 0.567 | 0.499 | 0.0680 |
| 6.288593482 | 0.567 | 0.499 | 0.0680 |
| 6.292548511 | 0.566 | 0.498 | 0.0680 |
| 6.301726598 | 0.564 | 0.496 | 0.0680 |
| 6.302556818 | 0.564 | 0.496 | 0.0680 |
| 6.305040155 | 0.563 | 0.495 | 0.0680 |
| 6.306275333 | 0.563 | 0.495 | 0.0680 |
| 6.736849882 | 0.474 | 0.406 | 0.0680 |
| 6.743305144 | 0.472 | 0.404 | 0.0680 |
| 6.744186047 | 0.472 | 0.404 | 0.0680 |
| 5.278482798 | 0.767 | 0.7   | 0.0670 |
| 5.279345461 | 0.767 | 0.7   | 0.0670 |
| 5.281294509 | 0.766 | 0.699 | 0.0670 |

|             |       |       |        |
|-------------|-------|-------|--------|
| 5.281870711 | 0.766 | 0.699 | 0.0670 |
| 5.283071096 | 0.766 | 0.699 | 0.0670 |
| 5.286990263 | 0.765 | 0.698 | 0.0670 |
| 6.315789474 | 0.561 | 0.494 | 0.0670 |
| 6.317403939 | 0.561 | 0.494 | 0.0670 |
| 6.319231425 | 0.561 | 0.494 | 0.0670 |
| 6.319722222 | 0.561 | 0.494 | 0.0670 |
| 6.324555629 | 0.56  | 0.493 | 0.0670 |
| 6.327327806 | 0.56  | 0.493 | 0.0670 |
| 6.328619462 | 0.56  | 0.493 | 0.0670 |
| 6.330237435 | 0.559 | 0.492 | 0.0670 |
| 6.33234714  | 0.559 | 0.492 | 0.0670 |
| 6.338412992 | 0.558 | 0.491 | 0.0670 |
| 6.342028004 | 0.557 | 0.49  | 0.0670 |
| 6.343070362 | 0.556 | 0.489 | 0.0670 |
| 6.344055584 | 0.556 | 0.489 | 0.0670 |
| 6.345490716 | 0.556 | 0.489 | 0.0670 |
| 6.346729618 | 0.556 | 0.489 | 0.0670 |
| 6.350858157 | 0.555 | 0.488 | 0.0670 |
| 6.357379376 | 0.553 | 0.486 | 0.0670 |
| 6.47943662  | 0.526 | 0.459 | 0.0670 |
| 6.480223464 | 0.526 | 0.459 | 0.0670 |
| 6.480964204 | 0.526 | 0.459 | 0.0670 |
| 6.487290862 | 0.524 | 0.457 | 0.0670 |
| 6.488322428 | 0.524 | 0.457 | 0.0670 |
| 6.48895566  | 0.524 | 0.457 | 0.0670 |
| 6.489713964 | 0.524 | 0.457 | 0.0670 |
| 6.501533742 | 0.521 | 0.454 | 0.0670 |
| 6.503281994 | 0.521 | 0.454 | 0.0670 |
| 6.506436706 | 0.52  | 0.453 | 0.0670 |
| 6.507392912 | 0.519 | 0.452 | 0.0670 |
| 6.509001811 | 0.519 | 0.452 | 0.0670 |
| 6.510847511 | 0.519 | 0.452 | 0.0670 |
| 6.512392901 | 0.519 | 0.452 | 0.0670 |
| 6.513721805 | 0.518 | 0.451 | 0.0670 |
| 6.514718615 | 0.518 | 0.451 | 0.0670 |
| 6.515640274 | 0.518 | 0.451 | 0.0670 |
| 6.519162179 | 0.517 | 0.45  | 0.0670 |
| 6.520538074 | 0.517 | 0.45  | 0.0670 |
| 6.528178936 | 0.516 | 0.449 | 0.0670 |
| 6.530012005 | 0.516 | 0.449 | 0.0670 |
| 6.531202076 | 0.515 | 0.448 | 0.0670 |
| 6.53256262  | 0.515 | 0.448 | 0.0670 |

|             |       |       |        |
|-------------|-------|-------|--------|
| 6.534640523 | 0.515 | 0.448 | 0.0670 |
| 6.536130281 | 0.514 | 0.447 | 0.0670 |
| 6.537387194 | 0.514 | 0.447 | 0.0670 |
| 6.545440118 | 0.512 | 0.445 | 0.0670 |
| 6.547190819 | 0.512 | 0.445 | 0.0670 |
| 6.548457411 | 0.512 | 0.445 | 0.0670 |
| 6.558790672 | 0.509 | 0.442 | 0.0670 |
| 6.55982467  | 0.509 | 0.442 | 0.0670 |
| 6.567605758 | 0.507 | 0.44  | 0.0670 |
| 6.56890739  | 0.507 | 0.44  | 0.0670 |
| 6.57223114  | 0.506 | 0.439 | 0.0670 |
| 6.573230141 | 0.506 | 0.439 | 0.0670 |
| 6.57438452  | 0.506 | 0.439 | 0.0670 |
| 6.576878892 | 0.505 | 0.438 | 0.0670 |
| 6.578064288 | 0.505 | 0.438 | 0.0670 |
| 6.579796265 | 0.505 | 0.438 | 0.0670 |
| 6.581461821 | 0.504 | 0.437 | 0.0670 |
| 6.583064706 | 0.504 | 0.437 | 0.0670 |
| 6.644516072 | 0.491 | 0.424 | 0.0670 |
| 6.644949066 | 0.491 | 0.424 | 0.0670 |
| 6.645365455 | 0.491 | 0.424 | 0.0670 |
| 6.645955542 | 0.491 | 0.424 | 0.0670 |
| 6.687308282 | 0.484 | 0.417 | 0.0670 |
| 6.732679739 | 0.475 | 0.408 | 0.0670 |
| 6.735402494 | 0.474 | 0.407 | 0.0670 |
| 6.768074031 | 0.467 | 0.4   | 0.0670 |
| 6.775254669 | 0.465 | 0.398 | 0.0670 |
| 6.77741964  | 0.465 | 0.398 | 0.0670 |
| 6.779092253 | 0.465 | 0.398 | 0.0670 |
| 6.779661017 | 0.465 | 0.398 | 0.0670 |
| 6.987468867 | 0.425 | 0.358 | 0.0670 |
| 6.990864257 | 0.424 | 0.357 | 0.0670 |
| 6.992744098 | 0.424 | 0.357 | 0.0670 |
| 6.993235523 | 0.424 | 0.357 | 0.0670 |
| 6.993664541 | 0.423 | 0.356 | 0.0670 |
| 6.994042342 | 0.423 | 0.356 | 0.0670 |
| 6.997109827 | 0.423 | 0.356 | 0.0670 |
| 7.006178725 | 0.421 | 0.354 | 0.0670 |
| 7.006586074 | 0.421 | 0.354 | 0.0670 |
| 7.007050996 | 0.421 | 0.354 | 0.0670 |
| 7.007586643 | 0.421 | 0.354 | 0.0670 |
| 7.010034569 | 0.421 | 0.354 | 0.0670 |
| 7.013042005 | 0.421 | 0.354 | 0.0670 |



|             |       |       |        |
|-------------|-------|-------|--------|
| 5.029243766 | 0.817 | 0.75  | 0.0670 |
| 6.738359544 | 0.473 | 0.406 | 0.0670 |
| 6.739935588 | 0.473 | 0.406 | 0.0670 |
| 6.741156887 | 0.472 | 0.405 | 0.0670 |
| 6.741998638 | 0.472 | 0.405 | 0.0670 |
| 6.745108896 | 0.471 | 0.404 | 0.0670 |
| 6.746509849 | 0.471 | 0.404 | 0.0670 |
| 6.747477716 | 0.471 | 0.404 | 0.0670 |
| 6.74898374  | 0.471 | 0.404 | 0.0670 |
| 6.750796178 | 0.471 | 0.404 | 0.0670 |
| 6.753279622 | 0.471 | 0.404 | 0.0670 |
| 6.755143018 | 0.471 | 0.404 | 0.0670 |
| 6.757688723 | 0.47  | 0.403 | 0.0670 |
| 6.759592035 | 0.469 | 0.402 | 0.0670 |
| 6.760963508 | 0.469 | 0.402 | 0.0670 |
| 6.761976782 | 0.469 | 0.402 | 0.0670 |
| 5.188089623 | 0.784 | 0.718 | 0.0660 |
| 5.188934217 | 0.784 | 0.718 | 0.0660 |
| 5.189531303 | 0.784 | 0.718 | 0.0660 |
| 5.190356556 | 0.784 | 0.718 | 0.0660 |
| 5.191782261 | 0.783 | 0.717 | 0.0660 |
| 5.192838929 | 0.783 | 0.717 | 0.0660 |
| 5.19408768  | 0.783 | 0.717 | 0.0660 |
| 5.203690533 | 0.782 | 0.716 | 0.0660 |
| 5.207716963 | 0.78  | 0.714 | 0.0660 |
| 5.208333333 | 0.78  | 0.714 | 0.0660 |
| 5.208817829 | 0.78  | 0.714 | 0.0660 |
| 5.209441582 | 0.78  | 0.714 | 0.0660 |
| 5.213525836 | 0.779 | 0.713 | 0.0660 |
| 5.21450482  | 0.779 | 0.713 | 0.0660 |
| 5.280200991 | 0.766 | 0.7   | 0.0660 |
| 5.285357556 | 0.765 | 0.699 | 0.0660 |
| 6.320621762 | 0.56  | 0.494 | 0.0660 |
| 6.321541302 | 0.56  | 0.494 | 0.0660 |
| 6.322209863 | 0.56  | 0.494 | 0.0660 |
| 6.33436853  | 0.558 | 0.492 | 0.0660 |
| 6.335640795 | 0.558 | 0.492 | 0.0660 |
| 6.336543582 | 0.558 | 0.492 | 0.0660 |
| 6.337618736 | 0.558 | 0.492 | 0.0660 |
| 6.339333548 | 0.557 | 0.491 | 0.0660 |
| 6.340666348 | 0.557 | 0.491 | 0.0660 |
| 6.351776305 | 0.554 | 0.488 | 0.0660 |
| 6.352571217 | 0.554 | 0.488 | 0.0660 |

|             |       |       |        |
|-------------|-------|-------|--------|
| 6.357820293 | 0.552 | 0.486 | 0.0660 |
| 6.358203097 | 0.552 | 0.486 | 0.0660 |
| 6.361008933 | 0.552 | 0.486 | 0.0660 |
| 6.363636364 | 0.552 | 0.486 | 0.0660 |
| 6.366028708 | 0.55  | 0.484 | 0.0660 |
| 6.368734336 | 0.55  | 0.484 | 0.0660 |
| 6.369644883 | 0.548 | 0.482 | 0.0660 |
| 6.370116692 | 0.548 | 0.482 | 0.0660 |
| 6.370669056 | 0.548 | 0.482 | 0.0660 |
| 6.375905797 | 0.547 | 0.481 | 0.0660 |
| 6.377382175 | 0.547 | 0.481 | 0.0660 |
| 6.37863155  | 0.547 | 0.481 | 0.0660 |
| 6.474589559 | 0.528 | 0.462 | 0.0660 |
| 6.47511499  | 0.527 | 0.461 | 0.0660 |
| 6.476341282 | 0.527 | 0.461 | 0.0660 |
| 6.477630074 | 0.527 | 0.461 | 0.0660 |
| 6.47843033  | 0.526 | 0.46  | 0.0660 |
| 6.482120051 | 0.525 | 0.459 | 0.0660 |
| 6.48356681  | 0.525 | 0.459 | 0.0660 |
| 6.484611742 | 0.525 | 0.459 | 0.0660 |
| 6.491106411 | 0.523 | 0.457 | 0.0660 |
| 6.492341955 | 0.523 | 0.457 | 0.0660 |
| 6.493021903 | 0.523 | 0.457 | 0.0660 |
| 6.494928429 | 0.523 | 0.457 | 0.0660 |
| 6.496995214 | 0.522 | 0.456 | 0.0660 |
| 6.498587571 | 0.522 | 0.456 | 0.0660 |
| 6.5047603   | 0.52  | 0.454 | 0.0660 |
| 6.523064687 | 0.516 | 0.45  | 0.0660 |
| 6.524606469 | 0.516 | 0.45  | 0.0660 |
| 6.525884401 | 0.516 | 0.45  | 0.0660 |
| 6.53950104  | 0.513 | 0.447 | 0.0660 |
| 6.540710522 | 0.513 | 0.447 | 0.0660 |
| 6.541116943 | 0.513 | 0.447 | 0.0660 |
| 6.54228163  | 0.512 | 0.446 | 0.0660 |
| 6.543663762 | 0.512 | 0.446 | 0.0660 |
| 6.646524025 | 0.49  | 0.424 | 0.0660 |
| 6.762797854 | 0.468 | 0.402 | 0.0660 |
| 6.763855831 | 0.468 | 0.402 | 0.0660 |
| 6.765586474 | 0.467 | 0.401 | 0.0660 |
| 6.76669218  | 0.467 | 0.401 | 0.0660 |
| 6.769708552 | 0.466 | 0.4   | 0.0660 |
| 6.770919939 | 0.466 | 0.4   | 0.0660 |
| 6.771902721 | 0.466 | 0.4   | 0.0660 |

|             |       |       |        |
|-------------|-------|-------|--------|
| 6.780241467 | 0.464 | 0.398 | 0.0660 |
| 6.782019351 | 0.463 | 0.397 | 0.0660 |
| 6.783421257 | 0.463 | 0.397 | 0.0660 |
| 6.784670008 | 0.463 | 0.397 | 0.0660 |
| 6.786796537 | 0.463 | 0.397 | 0.0660 |
| 6.788099978 | 0.463 | 0.397 | 0.0660 |
| 6.790584116 | 0.462 | 0.396 | 0.0660 |
| 6.795225953 | 0.461 | 0.395 | 0.0660 |
| 6.796227555 | 0.461 | 0.395 | 0.0660 |
| 6.798876404 | 0.46  | 0.394 | 0.0660 |
| 6.801360544 | 0.459 | 0.393 | 0.0660 |
| 6.803727408 | 0.459 | 0.393 | 0.0660 |
| 6.805144642 | 0.459 | 0.393 | 0.0660 |
| 6.807869777 | 0.458 | 0.392 | 0.0660 |
| 6.809163295 | 0.458 | 0.392 | 0.0660 |
| 6.810313381 | 0.458 | 0.392 | 0.0660 |
| 6.811202507 | 0.458 | 0.392 | 0.0660 |
| 6.813204509 | 0.458 | 0.392 | 0.0660 |
| 6.816734221 | 0.457 | 0.391 | 0.0660 |
| 6.818181818 | 0.457 | 0.391 | 0.0660 |
| 6.868849444 | 0.446 | 0.38  | 0.0660 |
| 6.870488653 | 0.446 | 0.38  | 0.0660 |
| 6.87287415  | 0.446 | 0.38  | 0.0660 |
| 6.985797744 | 0.425 | 0.359 | 0.0660 |
| 6.988941838 | 0.424 | 0.358 | 0.0660 |
| 7.002824859 | 0.421 | 0.355 | 0.0660 |
| 7.005818871 | 0.421 | 0.355 | 0.0660 |
| 7.014407131 | 0.42  | 0.354 | 0.0660 |
| 7.015527203 | 0.42  | 0.354 | 0.0660 |
| 5.025790327 | 0.817 | 0.751 | 0.0660 |
| 5.026596497 | 0.817 | 0.751 | 0.0660 |
| 5.027181139 | 0.817 | 0.751 | 0.0660 |
| 5.027778635 | 0.817 | 0.751 | 0.0660 |
| 5.028090774 | 0.817 | 0.751 | 0.0660 |
| 5.028575161 | 0.817 | 0.751 | 0.0660 |
| 5.029762959 | 0.816 | 0.75  | 0.0660 |
| 5.030121575 | 0.816 | 0.75  | 0.0660 |
| 5.030679465 | 0.816 | 0.75  | 0.0660 |
| 5.031251221 | 0.816 | 0.75  | 0.0660 |
| 5.050252525 | 0.813 | 0.747 | 0.0660 |
| 5.050762729 | 0.813 | 0.747 | 0.0660 |
| 6.756037953 | 0.47  | 0.404 | 0.0660 |
| 6.756756757 | 0.47  | 0.404 | 0.0660 |

|             |       |       |        |
|-------------|-------|-------|--------|
| 5.051825994 | 0.812 | 0.747 | 0.0650 |
| 5.052911534 | 0.812 | 0.747 | 0.0650 |
| 5.054068272 | 0.812 | 0.747 | 0.0650 |
| 5.055250305 | 0.812 | 0.747 | 0.0650 |
| 5.055867665 | 0.812 | 0.747 | 0.0650 |
| 5.059173669 | 0.811 | 0.746 | 0.0650 |
| 5.06024971  | 0.811 | 0.746 | 0.0650 |
| 5.06289557  | 0.81  | 0.745 | 0.0650 |
| 5.085230024 | 0.806 | 0.741 | 0.0650 |
| 5.085960591 | 0.806 | 0.741 | 0.0650 |
| 5.090364725 | 0.805 | 0.74  | 0.0650 |
| 5.091466815 | 0.805 | 0.74  | 0.0650 |
| 5.092880147 | 0.804 | 0.739 | 0.0650 |
| 5.093753662 | 0.804 | 0.739 | 0.0650 |
| 5.096157797 | 0.803 | 0.738 | 0.0650 |
| 5.098688482 | 0.802 | 0.737 | 0.0650 |
| 5.101355979 | 0.801 | 0.736 | 0.0650 |
| 5.102744546 | 0.801 | 0.736 | 0.0650 |
| 5.103807471 | 0.801 | 0.736 | 0.0650 |
| 5.104530886 | 0.801 | 0.736 | 0.0650 |
| 5.106382979 | 0.8   | 0.735 | 0.0650 |
| 5.107148324 | 0.8   | 0.735 | 0.0650 |
| 5.108304661 | 0.8   | 0.735 | 0.0650 |
| 5.133511586 | 0.796 | 0.731 | 0.0650 |
| 5.134412487 | 0.796 | 0.731 | 0.0650 |
| 5.180018148 | 0.787 | 0.722 | 0.0650 |
| 5.182704291 | 0.786 | 0.721 | 0.0650 |
| 5.184215629 | 0.785 | 0.72  | 0.0650 |
| 5.185185185 | 0.785 | 0.72  | 0.0650 |
| 5.186342593 | 0.784 | 0.719 | 0.0650 |
| 5.191048263 | 0.783 | 0.718 | 0.0650 |
| 5.195827794 | 0.782 | 0.717 | 0.0650 |
| 5.197295253 | 0.782 | 0.717 | 0.0650 |
| 5.198870056 | 0.782 | 0.717 | 0.0650 |
| 5.201156069 | 0.782 | 0.717 | 0.0650 |
| 5.202507421 | 0.782 | 0.717 | 0.0650 |
| 5.205078907 | 0.781 | 0.716 | 0.0650 |
| 5.206856081 | 0.78  | 0.715 | 0.0650 |
| 5.210053577 | 0.779 | 0.714 | 0.0650 |
| 5.210896961 | 0.779 | 0.714 | 0.0650 |
| 5.212016782 | 0.779 | 0.714 | 0.0650 |
| 5.214888845 | 0.778 | 0.713 | 0.0650 |
| 5.216222534 | 0.778 | 0.713 | 0.0650 |

|             |       |       |        |
|-------------|-------|-------|--------|
| 5.217391304 | 0.778 | 0.713 | 0.0650 |
| 5.219953003 | 0.777 | 0.712 | 0.0650 |
| 5.220357011 | 0.777 | 0.712 | 0.0650 |
| 5.221759086 | 0.777 | 0.712 | 0.0650 |
| 5.223824519 | 0.777 | 0.712 | 0.0650 |
| 5.225262776 | 0.776 | 0.711 | 0.0650 |
| 5.226539589 | 0.776 | 0.711 | 0.0650 |
| 5.227272727 | 0.776 | 0.711 | 0.0650 |
| 5.228015449 | 0.776 | 0.711 | 0.0650 |
| 5.230327144 | 0.775 | 0.71  | 0.0650 |
| 5.231278655 | 0.775 | 0.71  | 0.0650 |
| 5.23217311  | 0.775 | 0.71  | 0.0650 |
| 5.264715042 | 0.769 | 0.704 | 0.0650 |
| 5.266469428 | 0.769 | 0.704 | 0.0650 |
| 5.2710047   | 0.768 | 0.703 | 0.0650 |
| 5.272233202 | 0.768 | 0.703 | 0.0650 |
| 5.273349938 | 0.768 | 0.703 | 0.0650 |
| 5.274348939 | 0.768 | 0.703 | 0.0650 |
| 5.274977316 | 0.767 | 0.702 | 0.0650 |
| 5.275651489 | 0.767 | 0.702 | 0.0650 |
| 5.276227765 | 0.767 | 0.702 | 0.0650 |
| 5.277079844 | 0.767 | 0.702 | 0.0650 |
| 6.369237185 | 0.549 | 0.484 | 0.0650 |
| 6.372618374 | 0.547 | 0.482 | 0.0650 |
| 6.374634503 | 0.547 | 0.482 | 0.0650 |
| 6.379839221 | 0.546 | 0.481 | 0.0650 |
| 6.380973523 | 0.546 | 0.481 | 0.0650 |
| 6.382278835 | 0.546 | 0.481 | 0.0650 |
| 6.468827052 | 0.529 | 0.464 | 0.0650 |
| 6.485667486 | 0.524 | 0.459 | 0.0650 |
| 6.496582826 | 0.522 | 0.457 | 0.0650 |
| 6.789222312 | 0.462 | 0.397 | 0.0650 |
| 6.792468953 | 0.461 | 0.396 | 0.0650 |
| 6.794382462 | 0.461 | 0.396 | 0.0650 |
| 6.79713031  | 0.46  | 0.395 | 0.0650 |
| 6.797569215 | 0.46  | 0.395 | 0.0650 |
| 6.806392236 | 0.458 | 0.393 | 0.0650 |
| 6.81505072  | 0.457 | 0.392 | 0.0650 |
| 6.819686936 | 0.456 | 0.391 | 0.0650 |
| 6.822360732 | 0.456 | 0.391 | 0.0650 |
| 6.823926868 | 0.456 | 0.391 | 0.0650 |
| 6.824860575 | 0.455 | 0.39  | 0.0650 |
| 6.826491516 | 0.455 | 0.39  | 0.0650 |

|             |       |       |        |
|-------------|-------|-------|--------|
| 6.827771598 | 0.455 | 0.39  | 0.0650 |
| 6.828612641 | 0.455 | 0.39  | 0.0650 |
| 6.866169154 | 0.446 | 0.381 | 0.0650 |
| 6.867068273 | 0.446 | 0.381 | 0.0650 |
| 6.876806358 | 0.445 | 0.38  | 0.0650 |
| 6.879716312 | 0.444 | 0.379 | 0.0650 |
| 6.881558442 | 0.444 | 0.379 | 0.0650 |
| 6.883587427 | 0.444 | 0.379 | 0.0650 |
| 6.884651936 | 0.443 | 0.378 | 0.0650 |
| 6.885736723 | 0.443 | 0.378 | 0.0650 |
| 6.886822382 | 0.443 | 0.378 | 0.0650 |
| 6.888153054 | 0.443 | 0.378 | 0.0650 |
| 6.951545585 | 0.431 | 0.366 | 0.0650 |
| 6.957793033 | 0.43  | 0.365 | 0.0650 |
| 6.959261893 | 0.43  | 0.365 | 0.0650 |
| 6.96249414  | 0.429 | 0.364 | 0.0650 |
| 6.964240102 | 0.429 | 0.364 | 0.0650 |
| 6.966629588 | 0.429 | 0.364 | 0.0650 |
| 6.980498924 | 0.426 | 0.361 | 0.0650 |
| 6.982744372 | 0.425 | 0.36  | 0.0650 |
| 6.983683604 | 0.425 | 0.36  | 0.0650 |
| 6.984525804 | 0.425 | 0.36  | 0.0650 |
| 6.98510937  | 0.425 | 0.36  | 0.0650 |
| 7.017381286 | 0.419 | 0.354 | 0.0650 |
| 7.019250545 | 0.419 | 0.354 | 0.0650 |
| 7.020572073 | 0.419 | 0.354 | 0.0650 |
| 7.02208868  | 0.419 | 0.354 | 0.0650 |
| 7.023847076 | 0.419 | 0.354 | 0.0650 |
| 7.044739851 | 0.415 | 0.35  | 0.0650 |
| 7.045454545 | 0.415 | 0.35  | 0.0650 |
| 5.024524537 | 0.817 | 0.752 | 0.0650 |
| 5.031646837 | 0.815 | 0.75  | 0.0650 |
| 5.032052599 | 0.815 | 0.75  | 0.0650 |
| 5.033334815 | 0.814 | 0.749 | 0.0650 |
| 5.033785326 | 0.814 | 0.749 | 0.0650 |
| 5.034248182 | 0.814 | 0.749 | 0.0650 |
| 5.049509804 | 0.813 | 0.748 | 0.0650 |
| 5.056498979 | 0.811 | 0.747 | 0.0640 |
| 5.057478858 | 0.811 | 0.747 | 0.0640 |
| 5.058481532 | 0.811 | 0.747 | 0.0640 |
| 5.061352002 | 0.81  | 0.746 | 0.0640 |
| 5.062114198 | 0.81  | 0.746 | 0.0640 |
| 5.063696852 | 0.809 | 0.745 | 0.0640 |

|             |       |       |        |
|-------------|-------|-------|--------|
| 5.064518815 | 0.809 | 0.745 | 0.0640 |
| 5.065362269 | 0.809 | 0.745 | 0.0640 |
| 5.06622807  | 0.809 | 0.745 | 0.0640 |
| 5.084272323 | 0.806 | 0.742 | 0.0640 |
| 5.087482147 | 0.805 | 0.741 | 0.0640 |
| 5.089288878 | 0.805 | 0.741 | 0.0640 |
| 5.092308566 | 0.804 | 0.74  | 0.0640 |
| 5.094940512 | 0.803 | 0.739 | 0.0640 |
| 5.096930786 | 0.802 | 0.738 | 0.0640 |
| 5.097563297 | 0.802 | 0.738 | 0.0640 |
| 5.098039216 | 0.802 | 0.738 | 0.0640 |
| 5.100004445 | 0.801 | 0.737 | 0.0640 |
| 5.105639042 | 0.8   | 0.736 | 0.0640 |
| 5.109292881 | 0.799 | 0.735 | 0.0640 |
| 5.110500611 | 0.799 | 0.735 | 0.0640 |
| 5.111735331 | 0.799 | 0.735 | 0.0640 |
| 5.112997957 | 0.799 | 0.735 | 0.0640 |
| 5.1312345   | 0.796 | 0.732 | 0.0640 |
| 5.13245614  | 0.796 | 0.732 | 0.0640 |
| 5.135873578 | 0.795 | 0.731 | 0.0640 |
| 5.136799162 | 0.795 | 0.731 | 0.0640 |
| 5.138505218 | 0.794 | 0.73  | 0.0640 |
| 5.139276847 | 0.794 | 0.73  | 0.0640 |
| 5.140254937 | 0.794 | 0.73  | 0.0640 |
| 5.141044004 | 0.794 | 0.73  | 0.0640 |
| 5.14205004  | 0.794 | 0.73  | 0.0640 |
| 5.1621669   | 0.79  | 0.726 | 0.0640 |
| 5.164303196 | 0.79  | 0.726 | 0.0640 |
| 5.16611479  | 0.79  | 0.726 | 0.0640 |
| 5.167225951 | 0.79  | 0.726 | 0.0640 |
| 5.173416199 | 0.788 | 0.724 | 0.0640 |
| 5.17462189  | 0.788 | 0.724 | 0.0640 |
| 5.175352286 | 0.788 | 0.724 | 0.0640 |
| 5.176887776 | 0.787 | 0.723 | 0.0640 |
| 5.177938197 | 0.787 | 0.723 | 0.0640 |
| 5.179213772 | 0.787 | 0.723 | 0.0640 |
| 5.180451536 | 0.786 | 0.722 | 0.0640 |
| 5.181035021 | 0.786 | 0.722 | 0.0640 |
| 5.181914451 | 0.786 | 0.722 | 0.0640 |
| 5.183086451 | 0.785 | 0.721 | 0.0640 |
| 5.206045511 | 0.78  | 0.716 | 0.0640 |
| 5.21845175  | 0.777 | 0.713 | 0.0640 |
| 5.219646207 | 0.777 | 0.713 | 0.0640 |

|             |       |       |        |
|-------------|-------|-------|--------|
| 5.229321614 | 0.775 | 0.711 | 0.0640 |
| 5.233728734 | 0.774 | 0.71  | 0.0640 |
| 5.235096723 | 0.774 | 0.71  | 0.0640 |
| 5.236694678 | 0.774 | 0.71  | 0.0640 |
| 5.24640761  | 0.773 | 0.709 | 0.0640 |
| 5.255756149 | 0.771 | 0.707 | 0.0640 |
| 5.256776557 | 0.771 | 0.707 | 0.0640 |
| 5.258201058 | 0.77  | 0.706 | 0.0640 |
| 5.259499759 | 0.77  | 0.706 | 0.0640 |
| 5.259927933 | 0.77  | 0.706 | 0.0640 |
| 5.260266137 | 0.77  | 0.706 | 0.0640 |
| 5.263157895 | 0.769 | 0.705 | 0.0640 |
| 5.267741935 | 0.768 | 0.704 | 0.0640 |
| 5.269139141 | 0.768 | 0.704 | 0.0640 |
| 5.269865674 | 0.768 | 0.704 | 0.0640 |
| 6.383797054 | 0.545 | 0.481 | 0.0640 |
| 6.385078777 | 0.545 | 0.481 | 0.0640 |
| 6.386319471 | 0.545 | 0.481 | 0.0640 |
| 6.388888889 | 0.544 | 0.48  | 0.0640 |
| 6.391691253 | 0.543 | 0.479 | 0.0640 |
| 6.39495333  | 0.542 | 0.478 | 0.0640 |
| 6.39620383  | 0.542 | 0.478 | 0.0640 |
| 6.465126906 | 0.529 | 0.465 | 0.0640 |
| 6.46641604  | 0.529 | 0.465 | 0.0640 |
| 6.466866267 | 0.529 | 0.465 | 0.0640 |
| 6.472473605 | 0.528 | 0.464 | 0.0640 |
| 6.830127104 | 0.454 | 0.39  | 0.0640 |
| 6.843671679 | 0.451 | 0.387 | 0.0640 |
| 6.84543784  | 0.451 | 0.387 | 0.0640 |
| 6.846731835 | 0.451 | 0.387 | 0.0640 |
| 6.849854385 | 0.45  | 0.386 | 0.0640 |
| 6.851122776 | 0.449 | 0.385 | 0.0640 |
| 6.852499352 | 0.449 | 0.385 | 0.0640 |
| 6.853992781 | 0.449 | 0.385 | 0.0640 |
| 6.855092311 | 0.449 | 0.385 | 0.0640 |
| 6.858058608 | 0.448 | 0.384 | 0.0640 |
| 6.859719738 | 0.447 | 0.383 | 0.0640 |
| 6.860889492 | 0.447 | 0.383 | 0.0640 |
| 6.861507998 | 0.447 | 0.383 | 0.0640 |
| 6.862223613 | 0.447 | 0.383 | 0.0640 |
| 6.863325212 | 0.446 | 0.382 | 0.0640 |
| 6.864788484 | 0.446 | 0.382 | 0.0640 |
| 6.878796804 | 0.444 | 0.38  | 0.0640 |



|             |       |       |        |
|-------------|-------|-------|--------|
| 6.879206758 | 0.444 | 0.38  | 0.0640 |
| 6.889566396 | 0.442 | 0.378 | 0.0640 |
| 6.890717806 | 0.442 | 0.378 | 0.0640 |
| 6.891541801 | 0.442 | 0.378 | 0.0640 |
| 6.897642951 | 0.441 | 0.377 | 0.0640 |
| 6.903993856 | 0.439 | 0.375 | 0.0640 |
| 6.904761905 | 0.439 | 0.375 | 0.0640 |
| 6.905618362 | 0.439 | 0.375 | 0.0640 |
| 6.907184778 | 0.439 | 0.375 | 0.0640 |
| 6.908053649 | 0.438 | 0.374 | 0.0640 |
| 6.908651735 | 0.438 | 0.374 | 0.0640 |
| 6.909830007 | 0.438 | 0.374 | 0.0640 |
| 6.911166906 | 0.438 | 0.374 | 0.0640 |
| 6.923076923 | 0.436 | 0.372 | 0.0640 |
| 6.925225612 | 0.435 | 0.371 | 0.0640 |
| 6.927739438 | 0.435 | 0.371 | 0.0640 |
| 6.928852643 | 0.434 | 0.37  | 0.0640 |
| 6.930824598 | 0.434 | 0.37  | 0.0640 |
| 6.940737489 | 0.432 | 0.368 | 0.0640 |
| 6.941925815 | 0.432 | 0.368 | 0.0640 |
| 6.943559802 | 0.432 | 0.368 | 0.0640 |
| 6.945276114 | 0.432 | 0.368 | 0.0640 |
| 6.946336335 | 0.432 | 0.368 | 0.0640 |
| 6.950787061 | 0.431 | 0.367 | 0.0640 |
| 6.952757021 | 0.43  | 0.366 | 0.0640 |
| 6.955082062 | 0.43  | 0.366 | 0.0640 |
| 6.960742388 | 0.429 | 0.365 | 0.0640 |
| 6.968719453 | 0.428 | 0.364 | 0.0640 |
| 6.970763978 | 0.428 | 0.364 | 0.0640 |
| 6.974496426 | 0.427 | 0.363 | 0.0640 |
| 6.976026414 | 0.427 | 0.363 | 0.0640 |
| 6.977580726 | 0.427 | 0.363 | 0.0640 |
| 6.979141519 | 0.426 | 0.362 | 0.0640 |
| 6.981690298 | 0.425 | 0.361 | 0.0640 |
| 7.025054922 | 0.418 | 0.354 | 0.0640 |
| 7.026171741 | 0.418 | 0.354 | 0.0640 |
| 7.030621786 | 0.417 | 0.353 | 0.0640 |
| 7.033370412 | 0.417 | 0.353 | 0.0640 |
| 7.035960379 | 0.416 | 0.352 | 0.0640 |
| 7.038255361 | 0.416 | 0.352 | 0.0640 |
| 7.039736842 | 0.415 | 0.351 | 0.0640 |
| 7.040408163 | 0.415 | 0.351 | 0.0640 |
| 7.041534924 | 0.415 | 0.351 | 0.0640 |

|             |       |       |        |
|-------------|-------|-------|--------|
| 7.043139339 | 0.415 | 0.351 | 0.0640 |
| 7.046217206 | 0.414 | 0.35  | 0.0640 |
| 7.048669789 | 0.414 | 0.35  | 0.0640 |
| 7.051652586 | 0.413 | 0.349 | 0.0640 |
| 7.053143344 | 0.413 | 0.349 | 0.0640 |
| 7.054529043 | 0.412 | 0.348 | 0.0640 |
| 7.055004622 | 0.412 | 0.348 | 0.0640 |
| 7.211999554 | 0.381 | 0.317 | 0.0640 |
| 7.213700234 | 0.381 | 0.317 | 0.0640 |
| 7.21829408  | 0.38  | 0.316 | 0.0640 |
| 7.218738979 | 0.38  | 0.316 | 0.0640 |
| 4.969511062 | 0.826 | 0.762 | 0.0640 |
| 4.970410057 | 0.825 | 0.761 | 0.0640 |
| 4.97092925  | 0.825 | 0.761 | 0.0640 |
| 5.011961722 | 0.817 | 0.753 | 0.0640 |
| 5.032468902 | 0.814 | 0.75  | 0.0640 |
| 5.032896161 | 0.814 | 0.75  | 0.0640 |
| 5.034723897 | 0.813 | 0.749 | 0.0640 |
| 5.036566487 | 0.813 | 0.749 | 0.0640 |
| 5.042019749 | 0.813 | 0.749 | 0.0640 |
| 5.046974241 | 0.813 | 0.749 | 0.0640 |
| 5.048548265 | 0.813 | 0.749 | 0.0640 |
| 5.067117117 | 0.808 | 0.745 | 0.0630 |
| 5.068030359 | 0.808 | 0.745 | 0.0630 |
| 5.068808787 | 0.808 | 0.745 | 0.0630 |
| 5.069284434 | 0.808 | 0.745 | 0.0630 |
| 5.083335905 | 0.806 | 0.743 | 0.0630 |
| 5.114289446 | 0.798 | 0.735 | 0.0630 |
| 5.115074951 | 0.798 | 0.735 | 0.0630 |
| 5.115743222 | 0.798 | 0.735 | 0.0630 |
| 5.116963064 | 0.798 | 0.735 | 0.0630 |
| 5.119064493 | 0.798 | 0.735 | 0.0630 |
| 5.123711866 | 0.797 | 0.734 | 0.0630 |
| 5.124172526 | 0.797 | 0.734 | 0.0630 |
| 5.124689055 | 0.797 | 0.734 | 0.0630 |
| 5.130380091 | 0.796 | 0.733 | 0.0630 |
| 5.137553924 | 0.794 | 0.731 | 0.0630 |
| 5.143682907 | 0.793 | 0.73  | 0.0630 |
| 5.144718103 | 0.793 | 0.73  | 0.0630 |
| 5.145563183 | 0.793 | 0.73  | 0.0630 |
| 5.146628827 | 0.793 | 0.73  | 0.0630 |
| 5.147493909 | 0.793 | 0.73  | 0.0630 |
| 5.154959339 | 0.792 | 0.729 | 0.0630 |

|             |       |       |        |
|-------------|-------|-------|--------|
| 5.160432395 | 0.79  | 0.727 | 0.0630 |
| 5.16816228  | 0.789 | 0.726 | 0.0630 |
| 5.169303677 | 0.789 | 0.726 | 0.0630 |
| 5.170261286 | 0.789 | 0.726 | 0.0630 |
| 5.171434169 | 0.789 | 0.726 | 0.0630 |
| 5.176174993 | 0.787 | 0.724 | 0.0630 |
| 5.239368475 | 0.773 | 0.71  | 0.0630 |
| 5.241010511 | 0.773 | 0.71  | 0.0630 |
| 5.242311277 | 0.773 | 0.71  | 0.0630 |
| 5.243572841 | 0.773 | 0.71  | 0.0630 |
| 5.244902039 | 0.773 | 0.71  | 0.0630 |
| 5.247570265 | 0.772 | 0.709 | 0.0630 |
| 5.248422867 | 0.772 | 0.709 | 0.0630 |
| 5.249309392 | 0.772 | 0.709 | 0.0630 |
| 5.250698324 | 0.772 | 0.709 | 0.0630 |
| 5.254669664 | 0.771 | 0.708 | 0.0630 |
| 5.261787281 | 0.769 | 0.706 | 0.0630 |
| 6.387992832 | 0.544 | 0.481 | 0.0630 |
| 6.389710717 | 0.543 | 0.48  | 0.0630 |
| 6.390754994 | 0.543 | 0.48  | 0.0630 |
| 6.393481443 | 0.542 | 0.479 | 0.0630 |
| 6.397287176 | 0.541 | 0.478 | 0.0630 |
| 6.397682495 | 0.541 | 0.478 | 0.0630 |
| 6.398924731 | 0.541 | 0.478 | 0.0630 |
| 6.460150743 | 0.53  | 0.467 | 0.0630 |
| 6.461629596 | 0.53  | 0.467 | 0.0630 |
| 6.462999834 | 0.529 | 0.466 | 0.0630 |
| 6.463751516 | 0.529 | 0.466 | 0.0630 |
| 6.831642026 | 0.453 | 0.39  | 0.0630 |
| 6.832815735 | 0.453 | 0.39  | 0.0630 |
| 6.833932854 | 0.453 | 0.39  | 0.0630 |
| 6.834987706 | 0.453 | 0.39  | 0.0630 |
| 6.836839166 | 0.453 | 0.39  | 0.0630 |
| 6.84040747  | 0.452 | 0.389 | 0.0630 |
| 6.842105263 | 0.452 | 0.389 | 0.0630 |
| 6.848155468 | 0.45  | 0.387 | 0.0630 |
| 6.848899958 | 0.45  | 0.387 | 0.0630 |
| 6.855508008 | 0.448 | 0.385 | 0.0630 |
| 6.85640648  | 0.448 | 0.385 | 0.0630 |
| 6.89227363  | 0.441 | 0.378 | 0.0630 |
| 6.893297381 | 0.441 | 0.378 | 0.0630 |
| 6.894174666 | 0.441 | 0.378 | 0.0630 |
| 6.895480831 | 0.441 | 0.378 | 0.0630 |

|             |       |       |        |
|-------------|-------|-------|--------|
| 6.896551724 | 0.441 | 0.378 | 0.0630 |
| 6.898979492 | 0.44  | 0.377 | 0.0630 |
| 6.899904801 | 0.44  | 0.377 | 0.0630 |
| 6.900996623 | 0.44  | 0.377 | 0.0630 |
| 6.902317129 | 0.44  | 0.377 | 0.0630 |
| 6.912258192 | 0.437 | 0.374 | 0.0630 |
| 6.913518696 | 0.437 | 0.374 | 0.0630 |
| 6.918421822 | 0.436 | 0.373 | 0.0630 |
| 6.920840787 | 0.436 | 0.373 | 0.0630 |
| 6.928338002 | 0.434 | 0.371 | 0.0630 |
| 6.932924335 | 0.433 | 0.37  | 0.0630 |
| 6.933819951 | 0.433 | 0.37  | 0.0630 |
| 6.93489522  | 0.433 | 0.37  | 0.0630 |
| 6.936491935 | 0.433 | 0.37  | 0.0630 |
| 6.939537009 | 0.432 | 0.369 | 0.0630 |
| 6.947308417 | 0.431 | 0.368 | 0.0630 |
| 6.949203279 | 0.431 | 0.368 | 0.0630 |
| 6.972154025 | 0.427 | 0.364 | 0.0630 |
| 6.972725019 | 0.427 | 0.364 | 0.0630 |
| 6.973328592 | 0.427 | 0.364 | 0.0630 |
| 7.027799228 | 0.417 | 0.354 | 0.0630 |
| 7.028778468 | 0.417 | 0.354 | 0.0630 |
| 7.03468324  | 0.416 | 0.353 | 0.0630 |
| 7.050820882 | 0.413 | 0.35  | 0.0630 |
| 7.05538514  | 0.411 | 0.348 | 0.0630 |
| 7.057189542 | 0.411 | 0.348 | 0.0630 |
| 7.058823529 | 0.411 | 0.348 | 0.0630 |
| 7.062718531 | 0.41  | 0.347 | 0.0630 |
| 7.21009334  | 0.381 | 0.318 | 0.0630 |
| 7.214737794 | 0.38  | 0.317 | 0.0630 |
| 7.215549482 | 0.38  | 0.317 | 0.0630 |
| 7.216201968 | 0.38  | 0.317 | 0.0630 |
| 7.217269979 | 0.38  | 0.317 | 0.0630 |
| 7.220578567 | 0.379 | 0.316 | 0.0630 |
| 7.226584064 | 0.378 | 0.315 | 0.0630 |
| 7.237824038 | 0.376 | 0.313 | 0.0630 |
| 4.959890495 | 0.828 | 0.765 | 0.0630 |
| 4.964531871 | 0.828 | 0.765 | 0.0630 |
| 4.965276103 | 0.828 | 0.765 | 0.0630 |
| 4.969134626 | 0.826 | 0.763 | 0.0630 |
| 4.969878425 | 0.825 | 0.762 | 0.0630 |
| 4.971263419 | 0.824 | 0.761 | 0.0630 |
| 4.971589992 | 0.824 | 0.761 | 0.0630 |

|             |       |       |        |
|-------------|-------|-------|--------|
| 4.971909226 | 0.824 | 0.761 | 0.0630 |
| 4.972221365 | 0.824 | 0.761 | 0.0630 |
| 4.972526643 | 0.824 | 0.761 | 0.0630 |
| 5.06993349  | 0.807 | 0.745 | 0.0620 |
| 5.070925553 | 0.807 | 0.745 | 0.0620 |
| 5.073027719 | 0.807 | 0.745 | 0.0620 |
| 5.075192221 | 0.807 | 0.745 | 0.0620 |
| 5.077561328 | 0.807 | 0.745 | 0.0620 |
| 5.079789492 | 0.807 | 0.745 | 0.0620 |
| 5.081524147 | 0.806 | 0.744 | 0.0620 |
| 5.082420071 | 0.806 | 0.744 | 0.0620 |
| 5.121969359 | 0.797 | 0.735 | 0.0620 |
| 5.126602564 | 0.796 | 0.734 | 0.0620 |
| 5.128869403 | 0.796 | 0.734 | 0.0620 |
| 5.129701904 | 0.796 | 0.734 | 0.0620 |
| 5.148591363 | 0.792 | 0.73  | 0.0620 |
| 5.149477165 | 0.792 | 0.73  | 0.0620 |
| 5.151537416 | 0.792 | 0.73  | 0.0620 |
| 5.154006704 | 0.792 | 0.73  | 0.0620 |
| 5.155764752 | 0.791 | 0.729 | 0.0620 |
| 5.156741352 | 0.791 | 0.729 | 0.0620 |
| 5.157563721 | 0.791 | 0.729 | 0.0620 |
| 5.158565203 | 0.791 | 0.729 | 0.0620 |
| 5.251597605 | 0.771 | 0.709 | 0.0620 |
| 5.252481559 | 0.771 | 0.709 | 0.0620 |
| 5.253700923 | 0.771 | 0.709 | 0.0620 |
| 6.401219512 | 0.54  | 0.478 | 0.0620 |
| 6.402658361 | 0.54  | 0.478 | 0.0620 |
| 6.40368604  | 0.54  | 0.478 | 0.0620 |
| 6.40486157  | 0.54  | 0.478 | 0.0620 |
| 6.409353557 | 0.539 | 0.477 | 0.0620 |
| 6.411010558 | 0.538 | 0.476 | 0.0620 |
| 6.411989223 | 0.538 | 0.476 | 0.0620 |
| 6.412628609 | 0.538 | 0.476 | 0.0620 |
| 6.452550638 | 0.531 | 0.469 | 0.0620 |
| 6.45641953  | 0.53  | 0.468 | 0.0620 |
| 6.457738095 | 0.53  | 0.468 | 0.0620 |
| 6.458980331 | 0.53  | 0.468 | 0.0620 |
| 6.838472486 | 0.452 | 0.39  | 0.0620 |
| 6.915789474 | 0.436 | 0.374 | 0.0620 |
| 6.917550726 | 0.436 | 0.374 | 0.0620 |
| 6.918023606 | 0.436 | 0.374 | 0.0620 |
| 6.938137755 | 0.432 | 0.37  | 0.0620 |

|             |       |       |        |
|-------------|-------|-------|--------|
| 7.060661765 | 0.41  | 0.348 | 0.0620 |
| 7.064077227 | 0.409 | 0.347 | 0.0620 |
| 7.065942029 | 0.409 | 0.347 | 0.0620 |
| 7.070746133 | 0.408 | 0.346 | 0.0620 |
| 7.153878108 | 0.39  | 0.328 | 0.0620 |
| 7.157117429 | 0.39  | 0.328 | 0.0620 |
| 7.16012857  | 0.39  | 0.328 | 0.0620 |
| 7.163649836 | 0.389 | 0.327 | 0.0620 |
| 7.203883073 | 0.382 | 0.32  | 0.0620 |
| 7.205425649 | 0.382 | 0.32  | 0.0620 |
| 7.20683728  | 0.381 | 0.319 | 0.0620 |
| 7.208547267 | 0.381 | 0.319 | 0.0620 |
| 7.224014337 | 0.378 | 0.316 | 0.0620 |
| 7.226041912 | 0.378 | 0.316 | 0.0620 |
| 7.227903209 | 0.377 | 0.315 | 0.0620 |
| 7.229322696 | 0.377 | 0.315 | 0.0620 |
| 7.23024948  | 0.377 | 0.315 | 0.0620 |
| 7.233373478 | 0.376 | 0.314 | 0.0620 |
| 7.235442329 | 0.376 | 0.314 | 0.0620 |
| 7.239034887 | 0.375 | 0.313 | 0.0620 |
| 7.240321557 | 0.375 | 0.313 | 0.0620 |
| 7.242484527 | 0.375 | 0.313 | 0.0620 |
| 7.243842116 | 0.375 | 0.313 | 0.0620 |
| 7.24523565  | 0.375 | 0.313 | 0.0620 |
| 4.921032945 | 0.833 | 0.771 | 0.0620 |
| 4.929045894 | 0.832 | 0.77  | 0.0620 |
| 4.931031202 | 0.832 | 0.77  | 0.0620 |
| 4.942855277 | 0.829 | 0.767 | 0.0620 |
| 4.945931728 | 0.828 | 0.766 | 0.0620 |
| 4.947088466 | 0.828 | 0.766 | 0.0620 |
| 4.948431685 | 0.828 | 0.766 | 0.0620 |
| 4.952623581 | 0.828 | 0.766 | 0.0620 |
| 4.965751818 | 0.827 | 0.765 | 0.0620 |
| 4.966214674 | 0.827 | 0.765 | 0.0620 |
| 4.966665185 | 0.827 | 0.765 | 0.0620 |
| 4.968353163 | 0.826 | 0.764 | 0.0620 |
| 4.968748779 | 0.826 | 0.764 | 0.0620 |
| 4.972825284 | 0.823 | 0.761 | 0.0620 |
| 4.973258973 | 0.823 | 0.761 | 0.0620 |
| 4.974082131 | 0.823 | 0.761 | 0.0620 |
| 4.9772685   | 0.822 | 0.76  | 0.0620 |
| 4.988789238 | 0.822 | 0.76  | 0.0620 |
| 5.080647492 | 0.806 | 0.745 | 0.0610 |

|             |       |       |        |
|-------------|-------|-------|--------|
| 5.159405068 | 0.79  | 0.729 | 0.0610 |
| 6.405739379 | 0.539 | 0.478 | 0.0610 |
| 6.406717814 | 0.539 | 0.478 | 0.0610 |
| 6.407818166 | 0.539 | 0.478 | 0.0610 |
| 6.413418291 | 0.537 | 0.476 | 0.0610 |
| 6.414443722 | 0.537 | 0.476 | 0.0610 |
| 6.416502394 | 0.537 | 0.476 | 0.0610 |
| 6.418414683 | 0.537 | 0.476 | 0.0610 |
| 6.419336003 | 0.537 | 0.476 | 0.0610 |
| 6.443698732 | 0.533 | 0.472 | 0.0610 |
| 6.44624182  | 0.532 | 0.471 | 0.0610 |
| 6.447034464 | 0.532 | 0.471 | 0.0610 |
| 6.447727926 | 0.532 | 0.471 | 0.0610 |
| 6.453694541 | 0.53  | 0.469 | 0.0610 |
| 6.454463582 | 0.53  | 0.469 | 0.0610 |
| 6.455361329 | 0.53  | 0.469 | 0.0610 |
| 7.075876504 | 0.406 | 0.345 | 0.0610 |
| 7.077422577 | 0.406 | 0.345 | 0.0610 |
| 7.079107024 | 0.406 | 0.345 | 0.0610 |
| 7.06716792  | 0.408 | 0.347 | 0.0610 |
| 7.068866434 | 0.408 | 0.347 | 0.0610 |
| 7.071625888 | 0.407 | 0.346 | 0.0610 |
| 7.072496968 | 0.407 | 0.346 | 0.0610 |
| 7.074000332 | 0.407 | 0.346 | 0.0610 |
| 7.146847566 | 0.391 | 0.33  | 0.0610 |
| 7.15117657  | 0.391 | 0.33  | 0.0610 |
| 7.151706943 | 0.391 | 0.33  | 0.0610 |
| 7.152108307 | 0.391 | 0.33  | 0.0610 |
| 7.152547829 | 0.391 | 0.33  | 0.0610 |
| 7.153031225 | 0.39  | 0.329 | 0.0610 |
| 7.160892075 | 0.389 | 0.328 | 0.0610 |
| 7.161726242 | 0.389 | 0.328 | 0.0610 |
| 7.162641365 | 0.389 | 0.328 | 0.0610 |
| 7.164766718 | 0.388 | 0.327 | 0.0610 |
| 7.189812564 | 0.384 | 0.323 | 0.0610 |
| 7.190931733 | 0.384 | 0.323 | 0.0610 |
| 7.198726115 | 0.383 | 0.322 | 0.0610 |
| 7.202589078 | 0.382 | 0.321 | 0.0610 |
| 7.231736817 | 0.376 | 0.315 | 0.0610 |
| 7.24734948  | 0.374 | 0.313 | 0.0610 |
| 7.249161074 | 0.374 | 0.313 | 0.0610 |
| 7.250954198 | 0.374 | 0.313 | 0.0610 |
| 7.252327825 | 0.374 | 0.313 | 0.0610 |

|             |       |       |        |
|-------------|-------|-------|--------|
| 7.255769564 | 0.372 | 0.311 | 0.0610 |
| 7.256890013 | 0.372 | 0.311 | 0.0610 |
| 7.257603687 | 0.372 | 0.311 | 0.0610 |
| 7.258661888 | 0.372 | 0.311 | 0.0610 |
| 7.259766616 | 0.372 | 0.311 | 0.0610 |
| 4.884389201 | 0.838 | 0.777 | 0.0610 |
| 4.896192529 | 0.837 | 0.776 | 0.0610 |
| 4.901475442 | 0.836 | 0.775 | 0.0610 |
| 4.903842203 | 0.835 | 0.774 | 0.0610 |
| 4.905059488 | 0.835 | 0.774 | 0.0610 |
| 4.906246338 | 0.835 | 0.774 | 0.0610 |
| 4.907403879 | 0.835 | 0.774 | 0.0610 |
| 4.910711122 | 0.834 | 0.773 | 0.0610 |
| 4.911761653 | 0.834 | 0.773 | 0.0610 |
| 4.91278775  | 0.834 | 0.773 | 0.0610 |
| 4.918456584 | 0.833 | 0.772 | 0.0610 |
| 4.922678358 | 0.832 | 0.771 | 0.0610 |
| 4.923467396 | 0.832 | 0.771 | 0.0610 |
| 4.924050146 | 0.832 | 0.771 | 0.0610 |
| 4.925175399 | 0.832 | 0.771 | 0.0610 |
| 4.926468821 | 0.832 | 0.771 | 0.0610 |
| 4.92718275  | 0.832 | 0.771 | 0.0610 |
| 4.932420091 | 0.831 | 0.77  | 0.0610 |
| 4.93377193  | 0.831 | 0.77  | 0.0610 |
| 4.934637731 | 0.831 | 0.77  | 0.0610 |
| 4.935481185 | 0.831 | 0.77  | 0.0610 |
| 4.936303148 | 0.831 | 0.77  | 0.0610 |
| 4.937885802 | 0.83  | 0.769 | 0.0610 |
| 4.938647998 | 0.83  | 0.769 | 0.0610 |
| 4.939391713 | 0.83  | 0.769 | 0.0610 |
| 4.940467753 | 0.83  | 0.769 | 0.0610 |
| 4.9421946   | 0.829 | 0.768 | 0.0610 |
| 4.943501021 | 0.828 | 0.767 | 0.0610 |
| 4.944437585 | 0.828 | 0.767 | 0.0610 |
| 4.967103839 | 0.826 | 0.765 | 0.0610 |
| 4.967736564 | 0.826 | 0.765 | 0.0610 |
| 4.974746831 | 0.822 | 0.761 | 0.0610 |
| 4.974999375 | 0.822 | 0.761 | 0.0610 |
| 4.976041452 | 0.822 | 0.761 | 0.0610 |
| 6.421555375 | 0.536 | 0.476 | 0.0600 |
| 6.423599362 | 0.536 | 0.476 | 0.0600 |
| 6.424411715 | 0.535 | 0.475 | 0.0600 |
| 6.424725736 | 0.535 | 0.475 | 0.0600 |



|             |       |       |        |
|-------------|-------|-------|--------|
| 6.426720947 | 0.535 | 0.475 | 0.0600 |
| 6.430659983 | 0.535 | 0.475 | 0.0600 |
| 6.432934779 | 0.535 | 0.475 | 0.0600 |
| 6.433343726 | 0.534 | 0.474 | 0.0600 |
| 6.43383748  | 0.534 | 0.474 | 0.0600 |
| 6.43513937  | 0.534 | 0.474 | 0.0600 |
| 6.436475911 | 0.534 | 0.474 | 0.0600 |
| 6.438875052 | 0.533 | 0.473 | 0.0600 |
| 6.44117348  | 0.533 | 0.473 | 0.0600 |
| 6.445113788 | 0.532 | 0.472 | 0.0600 |
| 6.448681397 | 0.531 | 0.471 | 0.0600 |
| 6.449489752 | 0.531 | 0.471 | 0.0600 |
| 6.450658523 | 0.531 | 0.471 | 0.0600 |
| 7.081812652 | 0.405 | 0.345 | 0.0600 |
| 7.0859035   | 0.404 | 0.344 | 0.0600 |
| 7.086353444 | 0.404 | 0.344 | 0.0600 |
| 7.087610884 | 0.404 | 0.344 | 0.0600 |
| 7.166010499 | 0.387 | 0.327 | 0.0600 |
| 7.167670683 | 0.387 | 0.327 | 0.0600 |
| 7.16924301  | 0.387 | 0.327 | 0.0600 |
| 7.170431976 | 0.387 | 0.327 | 0.0600 |
| 7.171733212 | 0.387 | 0.327 | 0.0600 |
| 7.173163418 | 0.387 | 0.327 | 0.0600 |
| 7.180347617 | 0.385 | 0.325 | 0.0600 |
| 7.182153323 | 0.385 | 0.325 | 0.0600 |
| 7.183503319 | 0.385 | 0.325 | 0.0600 |
| 7.184546616 | 0.385 | 0.325 | 0.0600 |
| 7.186342593 | 0.384 | 0.324 | 0.0600 |
| 7.188521242 | 0.384 | 0.324 | 0.0600 |
| 7.193012713 | 0.383 | 0.323 | 0.0600 |
| 7.195607151 | 0.383 | 0.323 | 0.0600 |
| 7.197210963 | 0.383 | 0.323 | 0.0600 |
| 7.201190476 | 0.382 | 0.322 | 0.0600 |
| 7.25313419  | 0.373 | 0.313 | 0.0600 |
| 7.254211544 | 0.373 | 0.313 | 0.0600 |
| 7.260710235 | 0.371 | 0.311 | 0.0600 |
| 7.263385748 | 0.371 | 0.311 | 0.0600 |
| 7.265906025 | 0.371 | 0.311 | 0.0600 |
| 7.331439394 | 0.358 | 0.298 | 0.0600 |
| 7.337895917 | 0.357 | 0.297 | 0.0600 |
| 7.338419587 | 0.357 | 0.297 | 0.0600 |
| 7.343203671 | 0.356 | 0.296 | 0.0600 |
| 7.344714506 | 0.356 | 0.296 | 0.0600 |

|             |       |       |        |
|-------------|-------|-------|--------|
| 7.346308894 | 0.356 | 0.296 | 0.0600 |
| 7.347711812 | 0.355 | 0.295 | 0.0600 |
| 4.87389479  | 0.84  | 0.78  | 0.0600 |
| 4.883175019 | 0.838 | 0.778 | 0.0600 |
| 4.88697318  | 0.837 | 0.777 | 0.0600 |
| 4.890096618 | 0.837 | 0.777 | 0.0600 |
| 4.891695339 | 0.837 | 0.777 | 0.0600 |
| 4.892279725 | 0.837 | 0.777 | 0.0600 |
| 4.89304507  | 0.837 | 0.777 | 0.0600 |
| 4.894725177 | 0.837 | 0.777 | 0.0600 |
| 4.89672947  | 0.836 | 0.776 | 0.0600 |
| 4.8974332   | 0.836 | 0.776 | 0.0600 |
| 4.898644021 | 0.836 | 0.776 | 0.0600 |
| 4.89966443  | 0.836 | 0.776 | 0.0600 |
| 4.900331126 | 0.836 | 0.776 | 0.0600 |
| 4.900826175 | 0.836 | 0.776 | 0.0600 |
| 4.902593295 | 0.835 | 0.775 | 0.0600 |
| 4.908533185 | 0.834 | 0.774 | 0.0600 |
| 4.909635275 | 0.834 | 0.774 | 0.0600 |
| 4.913790256 | 0.833 | 0.773 | 0.0600 |
| 4.914769976 | 0.833 | 0.773 | 0.0600 |
| 4.916190655 | 0.833 | 0.773 | 0.0600 |
| 4.93710443  | 0.83  | 0.77  | 0.0600 |
| 4.941518468 | 0.829 | 0.769 | 0.0600 |
| 6.424041742 | 0.535 | 0.476 | 0.0590 |
| 6.437140805 | 0.533 | 0.474 | 0.0590 |
| 6.437928082 | 0.533 | 0.474 | 0.0590 |
| 7.08452381  | 0.404 | 0.345 | 0.0590 |
| 7.089079917 | 0.403 | 0.344 | 0.0590 |
| 7.09087541  | 0.403 | 0.344 | 0.0590 |
| 7.093396588 | 0.403 | 0.344 | 0.0590 |
| 7.095684394 | 0.402 | 0.343 | 0.0590 |
| 7.097769813 | 0.402 | 0.343 | 0.0590 |
| 7.099001037 | 0.401 | 0.342 | 0.0590 |
| 7.099914179 | 0.401 | 0.342 | 0.0590 |
| 7.101020496 | 0.401 | 0.342 | 0.0590 |
| 7.102860502 | 0.4   | 0.341 | 0.0590 |
| 7.104355717 | 0.4   | 0.341 | 0.0590 |
| 7.106090698 | 0.4   | 0.341 | 0.0590 |
| 7.107178128 | 0.399 | 0.34  | 0.0590 |
| 7.107935876 | 0.399 | 0.34  | 0.0590 |
| 7.108904367 | 0.399 | 0.34  | 0.0590 |
| 7.110243056 | 0.399 | 0.34  | 0.0590 |

|             |       |       |        |
|-------------|-------|-------|--------|
| 7.138844302 | 0.392 | 0.333 | 0.0590 |
| 7.142857143 | 0.392 | 0.333 | 0.0590 |
| 7.174742781 | 0.386 | 0.327 | 0.0590 |
| 7.176743315 | 0.386 | 0.327 | 0.0590 |
| 7.178700645 | 0.386 | 0.327 | 0.0590 |
| 7.266426859 | 0.37  | 0.311 | 0.0590 |
| 7.266873706 | 0.37  | 0.311 | 0.0590 |
| 7.329369001 | 0.358 | 0.299 | 0.0590 |
| 7.33530572  | 0.357 | 0.298 | 0.0590 |
| 7.337470222 | 0.357 | 0.298 | 0.0590 |
| 7.34068351  | 0.356 | 0.297 | 0.0590 |
| 7.349739113 | 0.354 | 0.295 | 0.0590 |
| 7.351967277 | 0.354 | 0.295 | 0.0590 |
| 4.711790173 | 0.868 | 0.809 | 0.0590 |
| 4.866488414 | 0.841 | 0.782 | 0.0590 |
| 4.867195767 | 0.841 | 0.782 | 0.0590 |
| 4.87045241  | 0.84  | 0.781 | 0.0590 |
| 4.872445659 | 0.84  | 0.781 | 0.0590 |
| 4.873257084 | 0.84  | 0.781 | 0.0590 |
| 4.875457535 | 0.839 | 0.78  | 0.0590 |
| 4.877885132 | 0.839 | 0.78  | 0.0590 |
| 4.879372563 | 0.839 | 0.78  | 0.0590 |
| 4.881652661 | 0.838 | 0.779 | 0.0590 |
| 4.882491025 | 0.838 | 0.779 | 0.0590 |
| 7.101861001 | 0.4   | 0.342 | 0.0580 |
| 7.111893584 | 0.398 | 0.34  | 0.0580 |
| 7.113385008 | 0.398 | 0.34  | 0.0580 |
| 7.134324633 | 0.392 | 0.334 | 0.0580 |
| 7.134667192 | 0.392 | 0.334 | 0.0580 |
| 7.269904009 | 0.369 | 0.311 | 0.0580 |
| 7.328979835 | 0.358 | 0.3   | 0.0580 |
| 7.353889943 | 0.353 | 0.295 | 0.0580 |
| 7.355105305 | 0.353 | 0.295 | 0.0580 |
| 7.356931233 | 0.353 | 0.295 | 0.0580 |
| 7.363152138 | 0.352 | 0.294 | 0.0580 |
| 7.364602975 | 0.351 | 0.293 | 0.0580 |
| 7.365067163 | 0.351 | 0.293 | 0.0580 |
| 7.366845257 | 0.351 | 0.293 | 0.0580 |
| 7.368421053 | 0.351 | 0.293 | 0.0580 |
| 7.370107962 | 0.35  | 0.292 | 0.0580 |
| 7.372028823 | 0.35  | 0.292 | 0.0580 |
| 7.37754898  | 0.349 | 0.291 | 0.0580 |
| 7.378679563 | 0.349 | 0.291 | 0.0580 |

|             |       |       |        |
|-------------|-------|-------|--------|
| 4.707438531 | 0.868 | 0.81  | 0.0580 |
| 4.710266585 | 0.868 | 0.81  | 0.0580 |
| 4.712342781 | 0.867 | 0.809 | 0.0580 |
| 4.713009737 | 0.867 | 0.809 | 0.0580 |
| 4.714642444 | 0.867 | 0.809 | 0.0580 |
| 4.721626133 | 0.866 | 0.808 | 0.0580 |
| 4.722920156 | 0.866 | 0.808 | 0.0580 |
| 4.723772235 | 0.866 | 0.808 | 0.0580 |
| 4.774031448 | 0.856 | 0.798 | 0.0580 |
| 4.775156476 | 0.856 | 0.798 | 0.0580 |
| 4.776594733 | 0.856 | 0.798 | 0.0580 |
| 4.796309467 | 0.852 | 0.794 | 0.0580 |
| 4.806080791 | 0.851 | 0.793 | 0.0580 |
| 4.824850999 | 0.847 | 0.789 | 0.0580 |
| 4.826583801 | 0.847 | 0.789 | 0.0580 |
| 4.828565831 | 0.847 | 0.789 | 0.0580 |
| 4.830503064 | 0.846 | 0.788 | 0.0580 |
| 4.83183772  | 0.846 | 0.788 | 0.0580 |
| 4.832375325 | 0.846 | 0.788 | 0.0580 |
| 4.832934609 | 0.846 | 0.788 | 0.0580 |
| 4.834249084 | 0.846 | 0.788 | 0.0580 |
| 4.845829636 | 0.844 | 0.786 | 0.0580 |
| 4.847711812 | 0.844 | 0.786 | 0.0580 |
| 4.851115709 | 0.843 | 0.785 | 0.0580 |
| 4.851778077 | 0.843 | 0.785 | 0.0580 |
| 4.85794996  | 0.842 | 0.784 | 0.0580 |
| 4.861494782 | 0.841 | 0.783 | 0.0580 |
| 4.862446076 | 0.841 | 0.783 | 0.0580 |
| 4.863939282 | 0.841 | 0.783 | 0.0580 |
| 4.865587513 | 0.841 | 0.783 | 0.0580 |
| 4.86807296  | 0.84  | 0.782 | 0.0580 |
| 4.8687655   | 0.84  | 0.782 | 0.0580 |
| 4.880235227 | 0.838 | 0.78  | 0.0580 |
| 4.581143187 | 0.885 | 0.828 | 0.0570 |
| 4.584349593 | 0.884 | 0.827 | 0.0570 |
| 4.585500606 | 0.884 | 0.827 | 0.0570 |
| 4.58581131  | 0.884 | 0.827 | 0.0570 |
| 4.586808064 | 0.884 | 0.827 | 0.0570 |
| 4.590679451 | 0.883 | 0.826 | 0.0570 |
| 4.591515852 | 0.883 | 0.826 | 0.0570 |
| 4.592429995 | 0.882 | 0.825 | 0.0570 |
| 4.593259595 | 0.882 | 0.825 | 0.0570 |
| 4.594045265 | 0.882 | 0.825 | 0.0570 |

|             |       |       |        |
|-------------|-------|-------|--------|
| 4.65042216  | 0.875 | 0.818 | 0.0570 |
| 4.651784604 | 0.875 | 0.818 | 0.0570 |
| 4.653247234 | 0.875 | 0.818 | 0.0570 |
| 7.114739288 | 0.397 | 0.34  | 0.0570 |
| 7.115974516 | 0.397 | 0.34  | 0.0570 |
| 7.117105738 | 0.397 | 0.34  | 0.0570 |
| 7.118823529 | 0.397 | 0.34  | 0.0570 |
| 7.120606061 | 0.397 | 0.34  | 0.0570 |
| 7.12175714  | 0.396 | 0.339 | 0.0570 |
| 7.126092642 | 0.394 | 0.337 | 0.0570 |
| 7.129109864 | 0.394 | 0.337 | 0.0570 |
| 7.132067943 | 0.394 | 0.337 | 0.0570 |
| 7.133952152 | 0.392 | 0.335 | 0.0570 |
| 7.272727273 | 0.368 | 0.311 | 0.0570 |
| 7.279161665 | 0.367 | 0.31  | 0.0570 |
| 7.287435456 | 0.366 | 0.309 | 0.0570 |
| 7.292242173 | 0.365 | 0.308 | 0.0570 |
| 7.321548042 | 0.36  | 0.303 | 0.0570 |
| 7.323389154 | 0.36  | 0.303 | 0.0570 |
| 7.326912835 | 0.359 | 0.302 | 0.0570 |
| 7.359020564 | 0.352 | 0.295 | 0.0570 |
| 7.360330836 | 0.352 | 0.295 | 0.0570 |
| 7.361537151 | 0.352 | 0.295 | 0.0570 |
| 7.373631387 | 0.349 | 0.292 | 0.0570 |
| 7.375443262 | 0.349 | 0.292 | 0.0570 |
| 7.376467853 | 0.349 | 0.292 | 0.0570 |
| 7.380131363 | 0.348 | 0.291 | 0.0570 |
| 7.381751358 | 0.348 | 0.291 | 0.0570 |
| 7.386840308 | 0.347 | 0.29  | 0.0570 |
| 7.388297367 | 0.347 | 0.29  | 0.0570 |
| 4.699986666 | 0.869 | 0.812 | 0.0570 |
| 4.7028365   | 0.868 | 0.811 | 0.0570 |
| 4.704426325 | 0.868 | 0.811 | 0.0570 |
| 4.705882353 | 0.868 | 0.811 | 0.0570 |
| 4.716445111 | 0.866 | 0.809 | 0.0570 |
| 4.717464925 | 0.866 | 0.809 | 0.0570 |
| 4.718524921 | 0.866 | 0.809 | 0.0570 |
| 4.720065583 | 0.866 | 0.809 | 0.0570 |
| 4.724600553 | 0.865 | 0.808 | 0.0570 |
| 4.725651061 | 0.865 | 0.808 | 0.0570 |
| 4.726650062 | 0.865 | 0.808 | 0.0570 |
| 4.729399896 | 0.864 | 0.807 | 0.0570 |
| 4.744243851 | 0.861 | 0.804 | 0.0570 |

|             |       |       |        |
|-------------|-------|-------|--------|
| 4.747155095 | 0.86  | 0.803 | 0.0570 |
| 4.74803905  | 0.86  | 0.803 | 0.0570 |
| 4.749301676 | 0.86  | 0.803 | 0.0570 |
| 4.750690608 | 0.86  | 0.803 | 0.0570 |
| 4.760760073 | 0.858 | 0.801 | 0.0570 |
| 4.76599007  | 0.857 | 0.8   | 0.0570 |
| 4.7668985   | 0.857 | 0.8   | 0.0570 |
| 4.767980189 | 0.857 | 0.8   | 0.0570 |
| 4.769316731 | 0.857 | 0.8   | 0.0570 |
| 4.770678386 | 0.857 | 0.8   | 0.0570 |
| 4.77329831  | 0.856 | 0.799 | 0.0570 |
| 4.777423921 | 0.855 | 0.798 | 0.0570 |
| 4.778594771 | 0.855 | 0.798 | 0.0570 |
| 4.779815772 | 0.855 | 0.798 | 0.0570 |
| 4.783777466 | 0.854 | 0.797 | 0.0570 |
| 4.785111155 | 0.854 | 0.797 | 0.0570 |
| 4.791042914 | 0.853 | 0.796 | 0.0570 |
| 4.793709978 | 0.852 | 0.795 | 0.0570 |
| 4.794921093 | 0.852 | 0.795 | 0.0570 |
| 4.797492579 | 0.851 | 0.794 | 0.0570 |
| 4.79794707  | 0.851 | 0.794 | 0.0570 |
| 4.800233083 | 0.851 | 0.794 | 0.0570 |
| 4.802445733 | 0.851 | 0.794 | 0.0570 |
| 4.803276574 | 0.851 | 0.794 | 0.0570 |
| 4.804195421 | 0.851 | 0.794 | 0.0570 |
| 4.808217739 | 0.85  | 0.793 | 0.0570 |
| 4.81382452  | 0.849 | 0.792 | 0.0570 |
| 4.815943993 | 0.848 | 0.791 | 0.0570 |
| 4.817295709 | 0.848 | 0.791 | 0.0570 |
| 4.818085549 | 0.848 | 0.791 | 0.0570 |
| 4.818964979 | 0.848 | 0.791 | 0.0570 |
| 4.82035284  | 0.847 | 0.79  | 0.0570 |
| 4.821881798 | 0.847 | 0.79  | 0.0570 |
| 4.822932219 | 0.847 | 0.79  | 0.0570 |
| 4.823825007 | 0.847 | 0.79  | 0.0570 |
| 4.836060678 | 0.845 | 0.788 | 0.0570 |
| 4.8378331   | 0.845 | 0.788 | 0.0570 |
| 4.838709677 | 0.845 | 0.788 | 0.0570 |
| 4.839567605 | 0.845 | 0.788 | 0.0570 |
| 4.840594932 | 0.844 | 0.787 | 0.0570 |
| 4.841765813 | 0.844 | 0.787 | 0.0570 |
| 4.843743896 | 0.844 | 0.787 | 0.0570 |
| 4.849242424 | 0.843 | 0.786 | 0.0570 |

|             |       |       |        |
|-------------|-------|-------|--------|
| 4.850149701 | 0.843 | 0.786 | 0.0570 |
| 4.850522835 | 0.843 | 0.786 | 0.0570 |
| 4.852936088 | 0.842 | 0.785 | 0.0570 |
| 4.854085051 | 0.842 | 0.785 | 0.0570 |
| 4.854930131 | 0.842 | 0.785 | 0.0570 |
| 4.85563028  | 0.842 | 0.785 | 0.0570 |
| 4.856456044 | 0.842 | 0.785 | 0.0570 |
| 4.858955996 | 0.841 | 0.784 | 0.0570 |
| 4.86013302  | 0.841 | 0.784 | 0.0570 |
| 4.487492183 | 0.898 | 0.842 | 0.0560 |
| 4.488220621 | 0.898 | 0.842 | 0.0560 |
| 4.494026454 | 0.897 | 0.841 | 0.0560 |
| 4.494897433 | 0.897 | 0.841 | 0.0560 |
| 4.496227132 | 0.897 | 0.841 | 0.0560 |
| 4.554223028 | 0.889 | 0.833 | 0.0560 |
| 4.554714634 | 0.889 | 0.833 | 0.0560 |
| 4.570660522 | 0.887 | 0.831 | 0.0560 |
| 4.580825374 | 0.885 | 0.829 | 0.0560 |
| 4.582307061 | 0.884 | 0.828 | 0.0560 |
| 4.583333333 | 0.884 | 0.828 | 0.0560 |
| 4.58793208  | 0.883 | 0.827 | 0.0560 |
| 4.588803637 | 0.883 | 0.827 | 0.0560 |
| 4.589767958 | 0.883 | 0.827 | 0.0560 |
| 4.595433943 | 0.881 | 0.825 | 0.0560 |
| 4.596714845 | 0.881 | 0.825 | 0.0560 |
| 4.597428774 | 0.881 | 0.825 | 0.0560 |
| 4.598850575 | 0.881 | 0.825 | 0.0560 |
| 4.649165089 | 0.875 | 0.819 | 0.0560 |
| 4.655086353 | 0.874 | 0.818 | 0.0560 |
| 4.656809451 | 0.874 | 0.818 | 0.0560 |
| 4.65795967  | 0.874 | 0.818 | 0.0560 |
| 4.658738001 | 0.874 | 0.818 | 0.0560 |
| 4.660626536 | 0.874 | 0.818 | 0.0560 |
| 4.662541755 | 0.874 | 0.818 | 0.0560 |
| 4.663299239 | 0.873 | 0.817 | 0.0560 |
| 4.665171898 | 0.873 | 0.817 | 0.0560 |
| 4.668135095 | 0.873 | 0.817 | 0.0560 |
| 4.669707422 | 0.873 | 0.817 | 0.0560 |
| 4.688247608 | 0.87  | 0.814 | 0.0560 |
| 4.689130376 | 0.87  | 0.814 | 0.0560 |
| 4.689460355 | 0.87  | 0.814 | 0.0560 |
| 4.69079915  | 0.87  | 0.814 | 0.0560 |
| 4.692859943 | 0.869 | 0.813 | 0.0560 |

|             |       |       |        |
|-------------|-------|-------|--------|
| 4.693430004 | 0.869 | 0.813 | 0.0560 |
| 4.695932064 | 0.869 | 0.813 | 0.0560 |
| 7.122794915 | 0.395 | 0.339 | 0.0560 |
| 7.123735339 | 0.394 | 0.338 | 0.0560 |
| 7.124591503 | 0.394 | 0.338 | 0.0560 |
| 7.125374251 | 0.394 | 0.338 | 0.0560 |
| 7.132610037 | 0.393 | 0.337 | 0.0560 |
| 7.133100233 | 0.392 | 0.336 | 0.0560 |
| 7.133545648 | 0.392 | 0.336 | 0.0560 |
| 7.275604143 | 0.367 | 0.311 | 0.0560 |
| 7.278696289 | 0.367 | 0.311 | 0.0560 |
| 7.279705882 | 0.366 | 0.31  | 0.0560 |
| 7.282384106 | 0.366 | 0.31  | 0.0560 |
| 7.285241249 | 0.366 | 0.31  | 0.0560 |
| 7.289739604 | 0.365 | 0.309 | 0.0560 |
| 7.290994624 | 0.365 | 0.309 | 0.0560 |
| 7.293025381 | 0.364 | 0.308 | 0.0560 |
| 7.294415283 | 0.364 | 0.308 | 0.0560 |
| 7.296447391 | 0.364 | 0.308 | 0.0560 |
| 7.298073936 | 0.364 | 0.308 | 0.0560 |
| 7.299060324 | 0.364 | 0.308 | 0.0560 |
| 7.309018568 | 0.362 | 0.306 | 0.0560 |
| 7.317138411 | 0.36  | 0.304 | 0.0560 |
| 7.319551009 | 0.36  | 0.304 | 0.0560 |
| 7.324392213 | 0.359 | 0.303 | 0.0560 |
| 7.32521108  | 0.359 | 0.303 | 0.0560 |
| 7.328505699 | 0.358 | 0.302 | 0.0560 |
| 7.38358286  | 0.347 | 0.291 | 0.0560 |
| 7.38511815  | 0.347 | 0.291 | 0.0560 |
| 7.38991969  | 0.346 | 0.29  | 0.0560 |
| 7.391304348 | 0.346 | 0.29  | 0.0560 |
| 7.392621871 | 0.346 | 0.29  | 0.0560 |
| 4.702183854 | 0.868 | 0.812 | 0.0560 |
| 4.702541828 | 0.868 | 0.812 | 0.0560 |
| 4.727766798 | 0.864 | 0.808 | 0.0560 |
| 4.730860859 | 0.863 | 0.807 | 0.0560 |
| 4.732258065 | 0.863 | 0.807 | 0.0560 |
| 4.733530572 | 0.863 | 0.807 | 0.0560 |
| 4.735284958 | 0.863 | 0.807 | 0.0560 |
| 4.736842105 | 0.863 | 0.807 | 0.0560 |
| 4.740072067 | 0.862 | 0.806 | 0.0560 |
| 4.745330336 | 0.86  | 0.804 | 0.0560 |
| 4.746299077 | 0.86  | 0.804 | 0.0560 |



|             |       |       |        |
|-------------|-------|-------|--------|
| 4.752233818 | 0.859 | 0.803 | 0.0560 |
| 4.75359239  | 0.859 | 0.803 | 0.0560 |
| 4.754671558 | 0.859 | 0.803 | 0.0560 |
| 4.755671158 | 0.859 | 0.803 | 0.0560 |
| 4.757359125 | 0.858 | 0.802 | 0.0560 |
| 4.758828417 | 0.858 | 0.802 | 0.0560 |
| 4.759197217 | 0.858 | 0.802 | 0.0560 |
| 4.759486837 | 0.858 | 0.802 | 0.0560 |
| 4.763305322 | 0.857 | 0.801 | 0.0560 |
| 4.765165441 | 0.857 | 0.801 | 0.0560 |
| 4.771407717 | 0.856 | 0.8   | 0.0560 |
| 4.772150438 | 0.856 | 0.8   | 0.0560 |
| 4.780353793 | 0.854 | 0.798 | 0.0560 |
| 4.78154825  | 0.854 | 0.798 | 0.0560 |
| 4.782608696 | 0.854 | 0.798 | 0.0560 |
| 4.786577431 | 0.853 | 0.797 | 0.0560 |
| 4.788305591 | 0.853 | 0.797 | 0.0560 |
| 4.789103039 | 0.853 | 0.797 | 0.0560 |
| 4.789946423 | 0.853 | 0.797 | 0.0560 |
| 4.792283037 | 0.852 | 0.796 | 0.0560 |
| 4.809133489 | 0.849 | 0.793 | 0.0560 |
| 4.809825196 | 0.849 | 0.793 | 0.0560 |
| 4.811313291 | 0.849 | 0.793 | 0.0560 |
| 4.812667112 | 0.849 | 0.793 | 0.0560 |
| 4.480020492 | 0.899 | 0.844 | 0.0550 |
| 4.484692284 | 0.898 | 0.843 | 0.0550 |
| 4.485667486 | 0.898 | 0.843 | 0.0550 |
| 4.486832987 | 0.898 | 0.843 | 0.0550 |
| 4.489216141 | 0.897 | 0.842 | 0.0550 |
| 4.491274771 | 0.897 | 0.842 | 0.0550 |
| 4.493212255 | 0.897 | 0.842 | 0.0550 |
| 4.497197959 | 0.896 | 0.841 | 0.0550 |
| 4.498677249 | 0.896 | 0.841 | 0.0550 |
| 4.501184834 | 0.896 | 0.841 | 0.0550 |
| 4.52091227  | 0.893 | 0.838 | 0.0550 |
| 4.532705745 | 0.891 | 0.836 | 0.0550 |
| 4.536052246 | 0.89  | 0.835 | 0.0550 |
| 4.538407625 | 0.89  | 0.835 | 0.0550 |
| 4.540757144 | 0.89  | 0.835 | 0.0550 |
| 4.543369475 | 0.89  | 0.835 | 0.0550 |
| 4.545454545 | 0.89  | 0.835 | 0.0550 |
| 4.549678112 | 0.889 | 0.834 | 0.0550 |
| 4.550280899 | 0.889 | 0.834 | 0.0550 |

|             |       |       |        |
|-------------|-------|-------|--------|
| 4.550730001 | 0.889 | 0.834 | 0.0550 |
| 4.551090127 | 0.889 | 0.834 | 0.0550 |
| 4.552636331 | 0.889 | 0.834 | 0.0550 |
| 4.555264689 | 0.888 | 0.833 | 0.0550 |
| 4.55625879  | 0.888 | 0.833 | 0.0550 |
| 4.557392577 | 0.888 | 0.833 | 0.0550 |
| 4.559131345 | 0.888 | 0.833 | 0.0550 |
| 4.560921535 | 0.888 | 0.833 | 0.0550 |
| 4.569210196 | 0.887 | 0.832 | 0.0550 |
| 4.573295985 | 0.886 | 0.831 | 0.0550 |
| 4.575317548 | 0.886 | 0.831 | 0.0550 |
| 4.575871442 | 0.886 | 0.831 | 0.0550 |
| 4.576692807 | 0.886 | 0.831 | 0.0550 |
| 4.579479207 | 0.885 | 0.83  | 0.0550 |
| 4.602631579 | 0.88  | 0.825 | 0.0550 |
| 4.6062965   | 0.88  | 0.825 | 0.0550 |
| 4.608859727 | 0.88  | 0.825 | 0.0550 |
| 4.610584027 | 0.88  | 0.825 | 0.0550 |
| 4.610944777 | 0.879 | 0.824 | 0.0550 |
| 4.611255037 | 0.879 | 0.824 | 0.0550 |
| 4.61339179  | 0.879 | 0.824 | 0.0550 |
| 4.615384615 | 0.879 | 0.824 | 0.0550 |
| 4.634781504 | 0.877 | 0.822 | 0.0550 |
| 4.635589128 | 0.877 | 0.822 | 0.0550 |
| 4.637712863 | 0.876 | 0.821 | 0.0550 |
| 4.638864737 | 0.876 | 0.821 | 0.0550 |
| 4.639849067 | 0.876 | 0.821 | 0.0550 |
| 4.640703427 | 0.876 | 0.821 | 0.0550 |
| 4.64187056  | 0.876 | 0.821 | 0.0550 |
| 4.646110057 | 0.875 | 0.82  | 0.0550 |
| 4.647853736 | 0.875 | 0.82  | 0.0550 |
| 4.670070496 | 0.872 | 0.817 | 0.0550 |
| 4.670494176 | 0.872 | 0.817 | 0.0550 |
| 4.672012758 | 0.872 | 0.817 | 0.0550 |
| 4.673639939 | 0.872 | 0.817 | 0.0550 |
| 4.674234628 | 0.872 | 0.817 | 0.0550 |
| 4.675970795 | 0.871 | 0.816 | 0.0550 |
| 4.677018135 | 0.871 | 0.816 | 0.0550 |
| 4.677890964 | 0.871 | 0.816 | 0.0550 |
| 4.678924876 | 0.871 | 0.816 | 0.0550 |
| 4.680169122 | 0.871 | 0.816 | 0.0550 |
| 4.684962406 | 0.87  | 0.815 | 0.0550 |
| 4.686607143 | 0.87  | 0.815 | 0.0550 |

|             |       |       |        |
|-------------|-------|-------|--------|
| 4.692340279 | 0.869 | 0.814 | 0.0550 |
| 7.300428687 | 0.363 | 0.308 | 0.0550 |
| 7.30210944  | 0.363 | 0.308 | 0.0550 |
| 7.303798059 | 0.363 | 0.308 | 0.0550 |
| 7.306328423 | 0.362 | 0.307 | 0.0550 |
| 7.310634599 | 0.361 | 0.306 | 0.0550 |
| 7.311712185 | 0.361 | 0.306 | 0.0550 |
| 7.312966418 | 0.361 | 0.306 | 0.0550 |
| 7.314434539 | 0.36  | 0.305 | 0.0550 |
| 7.394152796 | 0.345 | 0.29  | 0.0550 |
| 7.395407951 | 0.345 | 0.29  | 0.0550 |
| 7.396854989 | 0.345 | 0.29  | 0.0550 |
| 4.738212719 | 0.862 | 0.807 | 0.0550 |
| 4.739733863 | 0.862 | 0.807 | 0.0550 |
| 4.741263891 | 0.861 | 0.806 | 0.0550 |
| 4.742562592 | 0.861 | 0.806 | 0.0550 |
| 4.743223443 | 0.861 | 0.806 | 0.0550 |
| 4.477635897 | 0.899 | 0.845 | 0.0540 |
| 4.478847137 | 0.899 | 0.845 | 0.0540 |
| 4.481003196 | 0.898 | 0.844 | 0.0540 |
| 4.481945348 | 0.898 | 0.844 | 0.0540 |
| 4.483647352 | 0.898 | 0.844 | 0.0540 |
| 4.502493735 | 0.895 | 0.841 | 0.0540 |
| 4.502770889 | 0.895 | 0.841 | 0.0540 |
| 4.503117617 | 0.895 | 0.841 | 0.0540 |
| 4.503907881 | 0.895 | 0.841 | 0.0540 |
| 4.5047275   | 0.895 | 0.841 | 0.0540 |
| 4.505561667 | 0.895 | 0.841 | 0.0540 |
| 4.50742168  | 0.894 | 0.84  | 0.0540 |
| 4.509237221 | 0.894 | 0.84  | 0.0540 |
| 4.510336743 | 0.894 | 0.84  | 0.0540 |
| 4.511845039 | 0.894 | 0.84  | 0.0540 |
| 4.513553114 | 0.894 | 0.84  | 0.0540 |
| 4.515207373 | 0.894 | 0.84  | 0.0540 |
| 4.516129032 | 0.894 | 0.84  | 0.0540 |
| 4.516947765 | 0.893 | 0.839 | 0.0540 |
| 4.517919393 | 0.893 | 0.839 | 0.0540 |
| 4.51892315  | 0.893 | 0.839 | 0.0540 |
| 4.520160978 | 0.893 | 0.839 | 0.0540 |
| 4.521784795 | 0.892 | 0.838 | 0.0540 |
| 4.522453029 | 0.892 | 0.838 | 0.0540 |
| 4.523211295 | 0.892 | 0.838 | 0.0540 |
| 4.529899253 | 0.891 | 0.837 | 0.0540 |

|             |       |       |        |
|-------------|-------|-------|--------|
| 4.53081837  | 0.891 | 0.837 | 0.0540 |
| 4.534522606 | 0.89  | 0.836 | 0.0540 |
| 4.535201423 | 0.89  | 0.836 | 0.0540 |
| 4.547405384 | 0.889 | 0.835 | 0.0540 |
| 4.561951754 | 0.887 | 0.833 | 0.0540 |
| 4.562803398 | 0.887 | 0.833 | 0.0540 |
| 4.56360468  | 0.887 | 0.833 | 0.0540 |
| 4.564659978 | 0.887 | 0.833 | 0.0540 |
| 4.565217391 | 0.887 | 0.833 | 0.0540 |
| 4.566073263 | 0.887 | 0.833 | 0.0540 |
| 4.567728526 | 0.887 | 0.833 | 0.0540 |
| 4.577289608 | 0.885 | 0.831 | 0.0540 |
| 4.577889021 | 0.885 | 0.831 | 0.0540 |
| 4.617633828 | 0.878 | 0.824 | 0.0540 |
| 4.620068103 | 0.878 | 0.824 | 0.0540 |
| 4.62047141  | 0.878 | 0.824 | 0.0540 |
| 4.620950888 | 0.878 | 0.824 | 0.0540 |
| 4.62216385  | 0.878 | 0.824 | 0.0540 |
| 4.623385746 | 0.878 | 0.824 | 0.0540 |
| 4.623966685 | 0.878 | 0.824 | 0.0540 |
| 4.627898927 | 0.877 | 0.823 | 0.0540 |
| 4.630604288 | 0.877 | 0.823 | 0.0540 |
| 4.632303235 | 0.877 | 0.823 | 0.0540 |
| 4.633586932 | 0.877 | 0.823 | 0.0540 |
| 4.636316549 | 0.876 | 0.822 | 0.0540 |
| 4.643832943 | 0.875 | 0.821 | 0.0540 |
| 4.644985017 | 0.875 | 0.821 | 0.0540 |
| 4.674940444 | 0.871 | 0.817 | 0.0540 |
| 4.682197684 | 0.87  | 0.816 | 0.0540 |
| 4.683877415 | 0.87  | 0.816 | 0.0540 |
| 7.408739675 | 0.343 | 0.289 | 0.0540 |
| 7.413776699 | 0.342 | 0.288 | 0.0540 |
| 7.416092265 | 0.342 | 0.288 | 0.0540 |
| 7.423777654 | 0.341 | 0.287 | 0.0540 |
| 7.438262195 | 0.337 | 0.283 | 0.0540 |
| 7.439512195 | 0.337 | 0.283 | 0.0540 |
| 7.440930233 | 0.337 | 0.283 | 0.0540 |
| 7.398052102 | 0.344 | 0.29  | 0.0540 |
| 7.399421965 | 0.344 | 0.29  | 0.0540 |
| 7.400787402 | 0.344 | 0.29  | 0.0540 |
| 7.402086103 | 0.344 | 0.29  | 0.0540 |
| 4.468679425 | 0.901 | 0.848 | 0.0530 |
| 4.469930989 | 0.901 | 0.848 | 0.0530 |

|             |       |       |        |
|-------------|-------|-------|--------|
| 4.475941154 | 0.9   | 0.847 | 0.0530 |
| 4.526055705 | 0.891 | 0.838 | 0.0530 |
| 4.528856826 | 0.891 | 0.838 | 0.0530 |
| 4.624638728 | 0.877 | 0.824 | 0.0530 |
| 4.625584112 | 0.877 | 0.824 | 0.0530 |
| 7.403588778 | 0.343 | 0.29  | 0.0530 |
| 7.404821722 | 0.343 | 0.29  | 0.0530 |
| 7.406235349 | 0.343 | 0.29  | 0.0530 |
| 7.411329678 | 0.342 | 0.289 | 0.0530 |
| 7.418286691 | 0.341 | 0.288 | 0.0530 |
| 7.420369243 | 0.341 | 0.288 | 0.0530 |
| 7.422348266 | 0.341 | 0.288 | 0.0530 |
| 7.425356506 | 0.34  | 0.287 | 0.0530 |
| 7.426685587 | 0.34  | 0.287 | 0.0530 |
| 7.429563492 | 0.339 | 0.286 | 0.0530 |
| 7.435053981 | 0.337 | 0.284 | 0.0530 |
| 7.436698718 | 0.337 | 0.284 | 0.0530 |
| 7.442734744 | 0.336 | 0.283 | 0.0530 |
| 7.444026734 | 0.336 | 0.283 | 0.0530 |
| 7.444849959 | 0.336 | 0.283 | 0.0530 |
| 4.461229744 | 0.902 | 0.85  | 0.0520 |
| 4.46547619  | 0.901 | 0.849 | 0.0520 |
| 4.467375887 | 0.901 | 0.849 | 0.0520 |
| 4.471318962 | 0.9   | 0.848 | 0.0520 |
| 4.47286695  | 0.9   | 0.848 | 0.0520 |
| 4.474411166 | 0.9   | 0.848 | 0.0520 |
| 7.427736007 | 0.339 | 0.287 | 0.0520 |
| 7.431493994 | 0.338 | 0.286 | 0.0520 |
| 7.433321479 | 0.338 | 0.286 | 0.0520 |
| 7.446031993 | 0.335 | 0.283 | 0.0520 |
| 7.447542186 | 0.335 | 0.283 | 0.0520 |
| 7.456780924 | 0.333 | 0.281 | 0.0520 |
| 7.459666927 | 0.333 | 0.281 | 0.0520 |
| 7.460927961 | 0.333 | 0.281 | 0.0520 |
| 7.463227342 | 0.332 | 0.28  | 0.0520 |
| 4.451043282 | 0.903 | 0.852 | 0.0510 |
| 4.451416208 | 0.903 | 0.852 | 0.0510 |
| 4.452880687 | 0.903 | 0.852 | 0.0510 |
| 4.454797008 | 0.903 | 0.852 | 0.0510 |
| 4.455702047 | 0.903 | 0.852 | 0.0510 |
| 4.457487091 | 0.902 | 0.851 | 0.0510 |
| 4.458215026 | 0.902 | 0.851 | 0.0510 |
| 4.459346311 | 0.902 | 0.851 | 0.0510 |

|             |       |       |        |
|-------------|-------|-------|--------|
| 4.463325653 | 0.901 | 0.85  | 0.0510 |
| 7.448970146 | 0.334 | 0.283 | 0.0510 |
| 7.450322411 | 0.334 | 0.283 | 0.0510 |
| 7.451604846 | 0.334 | 0.283 | 0.0510 |
| 7.453980802 | 0.333 | 0.282 | 0.0510 |
| 7.462112514 | 0.332 | 0.281 | 0.0510 |
| 7.464278424 | 0.331 | 0.28  | 0.0510 |
| 7.465271079 | 0.331 | 0.28  | 0.0510 |
| 4.435429757 | 0.905 | 0.855 | 0.0500 |
| 4.43835246  | 0.904 | 0.854 | 0.0500 |
| 4.438763532 | 0.904 | 0.854 | 0.0500 |
| 4.441734417 | 0.904 | 0.854 | 0.0500 |
| 4.444444444 | 0.904 | 0.854 | 0.0500 |
| 4.450405615 | 0.903 | 0.853 | 0.0500 |
| 4.450708251 | 0.903 | 0.853 | 0.0500 |
| 4.456240144 | 0.902 | 0.852 | 0.0500 |
| 4.456832298 | 0.902 | 0.852 | 0.0500 |
| 7.452822724 | 0.333 | 0.283 | 0.0500 |
| 7.466210046 | 0.33  | 0.28  | 0.0500 |
| 7.467099567 | 0.33  | 0.28  | 0.0500 |
| 7.467943449 | 0.33  | 0.28  | 0.0500 |
| 4.366649163 | 0.914 | 0.865 | 0.0490 |
| 4.368118572 | 0.914 | 0.865 | 0.0490 |
| 4.39895288  | 0.91  | 0.861 | 0.0490 |
| 4.432711062 | 0.905 | 0.856 | 0.0490 |
| 4.438036035 | 0.904 | 0.855 | 0.0490 |
| 4.447353112 | 0.903 | 0.854 | 0.0490 |
| 7.469471333 | 0.329 | 0.28  | 0.0490 |
| 7.471249174 | 0.329 | 0.28  | 0.0490 |
| 7.473068458 | 0.329 | 0.28  | 0.0490 |
| 7.477270882 | 0.329 | 0.28  | 0.0490 |
| 7.480615496 | 0.329 | 0.28  | 0.0490 |
| 7.481198756 | 0.329 | 0.28  | 0.0490 |
| 7.483218453 | 0.328 | 0.279 | 0.0490 |
| 7.483657338 | 0.328 | 0.279 | 0.0490 |
| 7.484653335 | 0.327 | 0.278 | 0.0490 |
| 7.485205029 | 0.327 | 0.278 | 0.0490 |
| 7.485547201 | 0.327 | 0.278 | 0.0490 |
| 7.492857143 | 0.327 | 0.278 | 0.0490 |
| 7.514637904 | 0.324 | 0.275 | 0.0490 |
| 7.515339733 | 0.324 | 0.275 | 0.0490 |
| 7.515725759 | 0.324 | 0.275 | 0.0490 |
| 7.516131718 | 0.324 | 0.275 | 0.0490 |

|             |       |       |        |
|-------------|-------|-------|--------|
| 7.516790624 | 0.324 | 0.275 | 0.0490 |
| 4.343145743 | 0.918 | 0.87  | 0.0480 |
| 4.346687913 | 0.917 | 0.869 | 0.0480 |
| 4.347826087 | 0.917 | 0.869 | 0.0480 |
| 4.348913043 | 0.917 | 0.869 | 0.0480 |
| 4.350141243 | 0.917 | 0.869 | 0.0480 |
| 4.351611831 | 0.917 | 0.869 | 0.0480 |
| 4.354452848 | 0.916 | 0.868 | 0.0480 |
| 4.355333465 | 0.916 | 0.868 | 0.0480 |
| 4.356131932 | 0.916 | 0.868 | 0.0480 |
| 4.356988772 | 0.916 | 0.868 | 0.0480 |
| 4.359719738 | 0.915 | 0.867 | 0.0480 |
| 4.361440612 | 0.915 | 0.867 | 0.0480 |
| 4.362580603 | 0.915 | 0.867 | 0.0480 |
| 4.363692991 | 0.915 | 0.867 | 0.0480 |
| 4.365061559 | 0.914 | 0.866 | 0.0480 |
| 4.369395712 | 0.913 | 0.865 | 0.0480 |
| 4.370615649 | 0.913 | 0.865 | 0.0480 |
| 4.371059206 | 0.913 | 0.865 | 0.0480 |
| 4.371421092 | 0.913 | 0.865 | 0.0480 |
| 4.371721998 | 0.913 | 0.865 | 0.0480 |
| 4.373429648 | 0.913 | 0.865 | 0.0480 |
| 4.376849112 | 0.912 | 0.864 | 0.0480 |
| 4.378891596 | 0.912 | 0.864 | 0.0480 |
| 4.38055372  | 0.912 | 0.864 | 0.0480 |
| 4.382369261 | 0.912 | 0.864 | 0.0480 |
| 4.38639092  | 0.911 | 0.863 | 0.0480 |
| 4.388321995 | 0.911 | 0.863 | 0.0480 |
| 4.389566396 | 0.911 | 0.863 | 0.0480 |
| 4.39774806  | 0.91  | 0.862 | 0.0480 |
| 4.400956938 | 0.909 | 0.861 | 0.0480 |
| 4.402043894 | 0.909 | 0.861 | 0.0480 |
| 4.403467909 | 0.909 | 0.861 | 0.0480 |
| 4.405770783 | 0.909 | 0.861 | 0.0480 |
| 4.4071813   | 0.909 | 0.861 | 0.0480 |
| 4.412360086 | 0.908 | 0.86  | 0.0480 |
| 4.413050503 | 0.908 | 0.86  | 0.0480 |
| 4.413276681 | 0.908 | 0.86  | 0.0480 |
| 4.413600462 | 0.908 | 0.86  | 0.0480 |
| 4.41434336  | 0.908 | 0.86  | 0.0480 |
| 4.42476489  | 0.906 | 0.858 | 0.0480 |
| 4.426185345 | 0.906 | 0.858 | 0.0480 |
| 4.429376973 | 0.905 | 0.857 | 0.0480 |

|             |       |       |        |
|-------------|-------|-------|--------|
| 4.429954974 | 0.905 | 0.857 | 0.0480 |
| 4.431098964 | 0.905 | 0.857 | 0.0480 |
| 4.432125307 | 0.905 | 0.857 | 0.0480 |
| 7.481747935 | 0.328 | 0.28  | 0.0480 |
| 7.482265936 | 0.328 | 0.28  | 0.0480 |
| 7.48275534  | 0.328 | 0.28  | 0.0480 |
| 7.484073849 | 0.327 | 0.279 | 0.0480 |
| 7.512886939 | 0.324 | 0.276 | 0.0480 |
| 7.513968224 | 0.324 | 0.276 | 0.0480 |
| 7.517485938 | 0.323 | 0.275 | 0.0480 |
| 7.517989336 | 0.323 | 0.275 | 0.0480 |
| 7.549027985 | 0.318 | 0.27  | 0.0480 |
| 7.550344641 | 0.318 | 0.27  | 0.0480 |
| 7.55173398  | 0.317 | 0.269 | 0.0480 |
| 7.553202193 | 0.317 | 0.269 | 0.0480 |
| 4.344492041 | 0.917 | 0.87  | 0.0470 |
| 4.353504081 | 0.916 | 0.869 | 0.0470 |
| 4.358258129 | 0.915 | 0.868 | 0.0470 |
| 4.358974359 | 0.915 | 0.868 | 0.0470 |
| 4.383138847 | 0.911 | 0.864 | 0.0470 |
| 4.383899049 | 0.911 | 0.864 | 0.0470 |
| 4.384631596 | 0.911 | 0.864 | 0.0470 |
| 4.390889147 | 0.91  | 0.863 | 0.0470 |
| 4.393219425 | 0.91  | 0.863 | 0.0470 |
| 4.395254427 | 0.91  | 0.863 | 0.0470 |
| 4.396383758 | 0.91  | 0.863 | 0.0470 |
| 4.397376741 | 0.91  | 0.863 | 0.0470 |
| 4.409673822 | 0.908 | 0.861 | 0.0470 |
| 4.415239016 | 0.907 | 0.86  | 0.0470 |
| 4.415914035 | 0.907 | 0.86  | 0.0470 |
| 4.416710784 | 0.907 | 0.86  | 0.0470 |
| 4.417891283 | 0.907 | 0.86  | 0.0470 |
| 4.419247077 | 0.907 | 0.86  | 0.0470 |
| 4.420829105 | 0.906 | 0.859 | 0.0470 |
| 4.42193963  | 0.906 | 0.859 | 0.0470 |
| 4.422593738 | 0.906 | 0.859 | 0.0470 |
| 4.423659674 | 0.906 | 0.859 | 0.0470 |
| 4.427472015 | 0.905 | 0.858 | 0.0470 |
| 4.42854222  | 0.905 | 0.858 | 0.0470 |
| 7.505980861 | 0.324 | 0.277 | 0.0470 |
| 7.518522584 | 0.322 | 0.275 | 0.0470 |
| 7.519088419 | 0.322 | 0.275 | 0.0470 |
| 7.519689922 | 0.322 | 0.275 | 0.0470 |



|             |       |       |        |
|-------------|-------|-------|--------|
| 7.542946893 | 0.318 | 0.271 | 0.0470 |
| 7.546039995 | 0.318 | 0.271 | 0.0470 |
| 7.547778454 | 0.318 | 0.271 | 0.0470 |
| 7.554756195 | 0.316 | 0.269 | 0.0470 |
| 7.556403732 | 0.316 | 0.269 | 0.0470 |
| 7.568314171 | 0.314 | 0.267 | 0.0470 |
| 7.570244672 | 0.314 | 0.267 | 0.0470 |
| 7.571841453 | 0.314 | 0.267 | 0.0470 |
| 7.572891874 | 0.314 | 0.267 | 0.0470 |
| 7.611001596 | 0.307 | 0.26  | 0.0470 |
| 7.634361461 | 0.303 | 0.256 | 0.0470 |
| 4.27872656  | 0.925 | 0.879 | 0.0460 |
| 4.28228022  | 0.925 | 0.879 | 0.0460 |
| 4.289083558 | 0.924 | 0.878 | 0.0460 |
| 4.292567879 | 0.924 | 0.878 | 0.0460 |
| 4.292938322 | 0.924 | 0.878 | 0.0460 |
| 4.293335989 | 0.924 | 0.878 | 0.0460 |
| 4.293631786 | 0.924 | 0.878 | 0.0460 |
| 4.297409461 | 0.923 | 0.877 | 0.0460 |
| 4.299758454 | 0.923 | 0.877 | 0.0460 |
| 4.336747705 | 0.919 | 0.873 | 0.0460 |
| 4.338429816 | 0.919 | 0.873 | 0.0460 |
| 4.340863952 | 0.918 | 0.872 | 0.0460 |
| 4.342481203 | 0.918 | 0.872 | 0.0460 |
| 7.523157895 | 0.321 | 0.275 | 0.0460 |
| 7.527863777 | 0.321 | 0.275 | 0.0460 |
| 7.530528667 | 0.321 | 0.275 | 0.0460 |
| 7.532056551 | 0.321 | 0.275 | 0.0460 |
| 7.532900433 | 0.321 | 0.275 | 0.0460 |
| 7.533789954 | 0.32  | 0.274 | 0.0460 |
| 7.534728921 | 0.32  | 0.274 | 0.0460 |
| 7.535721576 | 0.32  | 0.274 | 0.0460 |
| 7.536772658 | 0.319 | 0.273 | 0.0460 |
| 7.537887486 | 0.319 | 0.273 | 0.0460 |
| 7.539722573 | 0.318 | 0.272 | 0.0460 |
| 7.557695722 | 0.315 | 0.269 | 0.0460 |
| 7.558597326 | 0.315 | 0.269 | 0.0460 |
| 7.560015364 | 0.315 | 0.269 | 0.0460 |
| 7.56200041  | 0.315 | 0.269 | 0.0460 |
| 7.563563887 | 0.315 | 0.269 | 0.0460 |
| 7.564946019 | 0.315 | 0.269 | 0.0460 |
| 7.566678521 | 0.315 | 0.269 | 0.0460 |
| 7.574643494 | 0.313 | 0.267 | 0.0460 |

|             |       |       |        |
|-------------|-------|-------|--------|
| 7.576941288 | 0.313 | 0.267 | 0.0460 |
| 7.578871417 | 0.313 | 0.267 | 0.0460 |
| 7.589506964 | 0.311 | 0.265 | 0.0460 |
| 7.590801161 | 0.311 | 0.265 | 0.0460 |
| 7.592612919 | 0.31  | 0.264 | 0.0460 |
| 7.594460836 | 0.31  | 0.264 | 0.0460 |
| 7.609379273 | 0.307 | 0.261 | 0.0460 |
| 7.612421762 | 0.306 | 0.26  | 0.0460 |
| 7.614143921 | 0.306 | 0.26  | 0.0460 |
| 7.620499419 | 0.305 | 0.259 | 0.0460 |
| 7.622164421 | 0.305 | 0.259 | 0.0460 |
| 7.62544964  | 0.304 | 0.258 | 0.0460 |
| 7.632583367 | 0.303 | 0.257 | 0.0460 |
| 7.636465205 | 0.302 | 0.256 | 0.0460 |
| 7.638342082 | 0.302 | 0.256 | 0.0460 |
| 4.278340916 | 0.925 | 0.88  | 0.0450 |
| 4.293951479 | 0.923 | 0.878 | 0.0450 |
| 4.294298087 | 0.923 | 0.878 | 0.0450 |
| 4.294675161 | 0.923 | 0.878 | 0.0450 |
| 4.295086904 | 0.923 | 0.878 | 0.0450 |
| 4.302173913 | 0.922 | 0.877 | 0.0450 |
| 4.304491794 | 0.922 | 0.877 | 0.0450 |
| 4.305095659 | 0.922 | 0.877 | 0.0450 |
| 4.305887826 | 0.922 | 0.877 | 0.0450 |
| 4.306575394 | 0.922 | 0.877 | 0.0450 |
| 4.3073115   | 0.922 | 0.877 | 0.0450 |
| 4.319394328 | 0.921 | 0.876 | 0.0450 |
| 4.322094343 | 0.921 | 0.876 | 0.0450 |
| 4.331503713 | 0.919 | 0.874 | 0.0450 |
| 4.332565284 | 0.919 | 0.874 | 0.0450 |
| 4.334154351 | 0.919 | 0.874 | 0.0450 |
| 4.335117743 | 0.919 | 0.874 | 0.0450 |
| 4.33912349  | 0.918 | 0.873 | 0.0450 |
| 4.339622642 | 0.918 | 0.873 | 0.0450 |
| 7.580131498 | 0.312 | 0.267 | 0.0450 |
| 7.582268889 | 0.312 | 0.267 | 0.0450 |
| 7.58408114  | 0.312 | 0.267 | 0.0450 |
| 7.58523828  | 0.312 | 0.267 | 0.0450 |
| 7.587429689 | 0.311 | 0.266 | 0.0450 |
| 7.595917967 | 0.309 | 0.264 | 0.0450 |
| 7.598449612 | 0.309 | 0.264 | 0.0450 |
| 7.601169591 | 0.309 | 0.264 | 0.0450 |
| 7.602539454 | 0.309 | 0.264 | 0.0450 |

|             |       |       |        |
|-------------|-------|-------|--------|
| 7.603765073 | 0.308 | 0.263 | 0.0450 |
| 7.605212111 | 0.308 | 0.263 | 0.0450 |
| 7.608028808 | 0.307 | 0.262 | 0.0450 |
| 7.615639328 | 0.305 | 0.26  | 0.0450 |
| 7.617470829 | 0.305 | 0.26  | 0.0450 |
| 7.622664221 | 0.304 | 0.259 | 0.0450 |
| 7.62397541  | 0.304 | 0.259 | 0.0450 |
| 7.627052204 | 0.303 | 0.258 | 0.0450 |
| 7.628917379 | 0.303 | 0.258 | 0.0450 |
| 7.630604288 | 0.303 | 0.258 | 0.0450 |
| 7.639320221 | 0.301 | 0.256 | 0.0450 |
| 7.641304348 | 0.301 | 0.256 | 0.0450 |
| 4.243305144 | 0.929 | 0.885 | 0.0440 |
| 4.244998051 | 0.929 | 0.885 | 0.0440 |
| 4.246560942 | 0.929 | 0.885 | 0.0440 |
| 4.260859333 | 0.927 | 0.883 | 0.0440 |
| 4.266034755 | 0.926 | 0.882 | 0.0440 |
| 4.267091295 | 0.926 | 0.882 | 0.0440 |
| 4.267904303 | 0.926 | 0.882 | 0.0440 |
| 4.268649265 | 0.926 | 0.882 | 0.0440 |
| 4.270181316 | 0.926 | 0.882 | 0.0440 |
| 4.271600722 | 0.926 | 0.882 | 0.0440 |
| 4.277617213 | 0.925 | 0.881 | 0.0440 |
| 4.277926322 | 0.925 | 0.881 | 0.0440 |
| 4.308101473 | 0.921 | 0.877 | 0.0440 |
| 4.309427733 | 0.921 | 0.877 | 0.0440 |
| 4.310861037 | 0.921 | 0.877 | 0.0440 |
| 4.312551368 | 0.921 | 0.877 | 0.0440 |
| 4.315453053 | 0.921 | 0.877 | 0.0440 |
| 4.322748656 | 0.92  | 0.876 | 0.0440 |
| 4.323620495 | 0.92  | 0.876 | 0.0440 |
| 4.32508351  | 0.92  | 0.876 | 0.0440 |
| 4.326382887 | 0.92  | 0.876 | 0.0440 |
| 4.327640643 | 0.92  | 0.876 | 0.0440 |
| 4.328813251 | 0.92  | 0.876 | 0.0440 |
| 4.3295826   | 0.919 | 0.875 | 0.0440 |
| 4.330553549 | 0.919 | 0.875 | 0.0440 |
| 7.606497883 | 0.307 | 0.263 | 0.0440 |
| 7.643084622 | 0.3   | 0.256 | 0.0440 |
| 7.643495131 | 0.3   | 0.256 | 0.0440 |
| 7.645368492 | 0.3   | 0.256 | 0.0440 |
| 7.647058824 | 0.3   | 0.256 | 0.0440 |
| 7.649032767 | 0.299 | 0.255 | 0.0440 |

|             |       |       |        |
|-------------|-------|-------|--------|
| 7.651260931 | 0.299 | 0.255 | 0.0440 |
| 4.22992206  | 0.931 | 0.888 | 0.0430 |
| 4.236870669 | 0.93  | 0.887 | 0.0430 |
| 4.237691687 | 0.929 | 0.886 | 0.0430 |
| 4.238252917 | 0.929 | 0.886 | 0.0430 |
| 4.238770515 | 0.929 | 0.886 | 0.0430 |
| 4.240777339 | 0.929 | 0.886 | 0.0430 |
| 4.248008246 | 0.928 | 0.885 | 0.0430 |
| 4.249352332 | 0.928 | 0.885 | 0.0430 |
| 4.258816233 | 0.927 | 0.884 | 0.0430 |
| 4.259807144 | 0.927 | 0.884 | 0.0430 |
| 4.261829359 | 0.926 | 0.883 | 0.0430 |
| 4.262726488 | 0.926 | 0.883 | 0.0430 |
| 4.264280369 | 0.926 | 0.883 | 0.0430 |
| 4.274650654 | 0.925 | 0.882 | 0.0430 |
| 7.785986914 | 0.277 | 0.234 | 0.0430 |
| 7.786572394 | 0.277 | 0.234 | 0.0430 |
| 7.789148144 | 0.277 | 0.234 | 0.0430 |
| 7.809219078 | 0.274 | 0.231 | 0.0430 |
| 7.810434933 | 0.274 | 0.231 | 0.0430 |
| 7.65291807  | 0.298 | 0.255 | 0.0430 |
| 7.654746701 | 0.298 | 0.255 | 0.0430 |
| 7.655711207 | 0.298 | 0.255 | 0.0430 |
| 4.198504118 | 0.934 | 0.892 | 0.0420 |
| 4.20003923  | 0.934 | 0.892 | 0.0420 |
| 4.202040991 | 0.934 | 0.892 | 0.0420 |
| 4.205931264 | 0.933 | 0.891 | 0.0420 |
| 4.207483673 | 0.933 | 0.891 | 0.0420 |
| 4.207785533 | 0.933 | 0.891 | 0.0420 |
| 4.209223554 | 0.933 | 0.891 | 0.0420 |
| 4.211862143 | 0.933 | 0.891 | 0.0420 |
| 4.213340558 | 0.933 | 0.891 | 0.0420 |
| 4.222912353 | 0.932 | 0.89  | 0.0420 |
| 4.228823159 | 0.931 | 0.889 | 0.0420 |
| 4.231786732 | 0.93  | 0.888 | 0.0420 |
| 4.232966534 | 0.93  | 0.888 | 0.0420 |
| 4.234211476 | 0.93  | 0.888 | 0.0420 |
| 4.23587366  | 0.93  | 0.888 | 0.0420 |
| 4.250748503 | 0.927 | 0.885 | 0.0420 |
| 4.252185285 | 0.927 | 0.885 | 0.0420 |
| 4.253508605 | 0.927 | 0.885 | 0.0420 |
| 4.255450202 | 0.927 | 0.885 | 0.0420 |
| 4.25709125  | 0.927 | 0.885 | 0.0420 |

|             |       |       |        |
|-------------|-------|-------|--------|
| 4.257899474 | 0.927 | 0.885 | 0.0420 |
| 7.785022513 | 0.278 | 0.236 | 0.0420 |
| 7.792764345 | 0.276 | 0.234 | 0.0420 |
| 7.794696619 | 0.276 | 0.234 | 0.0420 |
| 7.79594288  | 0.276 | 0.234 | 0.0420 |
| 7.797114609 | 0.276 | 0.234 | 0.0420 |
| 7.802224371 | 0.275 | 0.233 | 0.0420 |
| 7.811575444 | 0.273 | 0.231 | 0.0420 |
| 7.814700704 | 0.273 | 0.231 | 0.0420 |
| 7.817541613 | 0.273 | 0.231 | 0.0420 |
| 7.657238924 | 0.297 | 0.255 | 0.0420 |
| 7.658901158 | 0.297 | 0.255 | 0.0420 |
| 7.661054518 | 0.296 | 0.254 | 0.0420 |
| 7.661813992 | 0.296 | 0.254 | 0.0420 |
| 7.663285619 | 0.296 | 0.254 | 0.0420 |
| 7.665450122 | 0.296 | 0.254 | 0.0420 |
| 7.672094426 | 0.295 | 0.253 | 0.0420 |
| 7.67368729  | 0.294 | 0.252 | 0.0420 |
| 7.675237471 | 0.294 | 0.252 | 0.0420 |
| 4.178159834 | 0.936 | 0.895 | 0.0410 |
| 4.184228039 | 0.935 | 0.894 | 0.0410 |
| 4.18541456  | 0.935 | 0.894 | 0.0410 |
| 4.194475343 | 0.934 | 0.893 | 0.0410 |
| 4.196466582 | 0.934 | 0.893 | 0.0410 |
| 4.197822036 | 0.934 | 0.893 | 0.0410 |
| 4.203360103 | 0.933 | 0.892 | 0.0410 |
| 4.204183555 | 0.933 | 0.892 | 0.0410 |
| 4.214849681 | 0.932 | 0.891 | 0.0410 |
| 4.216541843 | 0.932 | 0.891 | 0.0410 |
| 4.217808735 | 0.932 | 0.891 | 0.0410 |
| 4.219927764 | 0.932 | 0.891 | 0.0410 |
| 4.221663875 | 0.932 | 0.891 | 0.0410 |
| 4.224477299 | 0.931 | 0.89  | 0.0410 |
| 4.225771294 | 0.931 | 0.89  | 0.0410 |
| 4.2264973   | 0.931 | 0.89  | 0.0410 |
| 4.227496022 | 0.931 | 0.89  | 0.0410 |
| 4.228379674 | 0.931 | 0.89  | 0.0410 |
| 7.749172185 | 0.281 | 0.24  | 0.0410 |
| 7.750968992 | 0.281 | 0.24  | 0.0410 |
| 7.752780586 | 0.281 | 0.24  | 0.0410 |
| 7.756253909 | 0.28  | 0.239 | 0.0410 |
| 7.757515473 | 0.28  | 0.239 | 0.0410 |
| 7.75990736  | 0.28  | 0.239 | 0.0410 |

|             |       |       |        |
|-------------|-------|-------|--------|
| 7.761715896 | 0.28  | 0.239 | 0.0410 |
| 7.762697828 | 0.28  | 0.239 | 0.0410 |
| 7.774024024 | 0.279 | 0.238 | 0.0410 |
| 7.781293952 | 0.278 | 0.237 | 0.0410 |
| 7.785474593 | 0.277 | 0.236 | 0.0410 |
| 7.798180593 | 0.275 | 0.234 | 0.0410 |
| 7.799371069 | 0.275 | 0.234 | 0.0410 |
| 7.80070922  | 0.275 | 0.234 | 0.0410 |
| 7.805624741 | 0.274 | 0.233 | 0.0410 |
| 7.818865345 | 0.272 | 0.231 | 0.0410 |
| 7.820030846 | 0.272 | 0.231 | 0.0410 |
| 7.821546733 | 0.272 | 0.231 | 0.0410 |
| 7.848029716 | 0.268 | 0.227 | 0.0410 |
| 7.850038439 | 0.268 | 0.227 | 0.0410 |
| 7.851545761 | 0.268 | 0.227 | 0.0410 |
| 7.660196591 | 0.296 | 0.255 | 0.0410 |
| 7.667919799 | 0.295 | 0.254 | 0.0410 |
| 7.670202905 | 0.295 | 0.254 | 0.0410 |
| 7.676737846 | 0.293 | 0.252 | 0.0410 |
| 7.677995392 | 0.292 | 0.251 | 0.0410 |
| 7.679285714 | 0.292 | 0.251 | 0.0410 |
| 7.68057971  | 0.292 | 0.251 | 0.0410 |
| 7.681639313 | 0.292 | 0.251 | 0.0410 |
| 7.682523017 | 0.292 | 0.251 | 0.0410 |
| 7.686820997 | 0.291 | 0.25  | 0.0410 |
| 7.687287415 | 0.291 | 0.25  | 0.0410 |
| 7.689903846 | 0.291 | 0.25  | 0.0410 |
| 7.692307692 | 0.291 | 0.25  | 0.0410 |
| 7.738476152 | 0.284 | 0.243 | 0.0410 |
| 7.740830756 | 0.283 | 0.242 | 0.0410 |
| 7.742918961 | 0.283 | 0.242 | 0.0410 |
| 7.744131671 | 0.283 | 0.242 | 0.0410 |
| 7.745419888 | 0.283 | 0.242 | 0.0410 |
| 7.74686581  | 0.282 | 0.241 | 0.0410 |
| 7.747798559 | 0.282 | 0.241 | 0.0410 |
| 4.170735193 | 0.937 | 0.897 | 0.0400 |
| 4.170988633 | 0.937 | 0.897 | 0.0400 |
| 4.171275783 | 0.936 | 0.896 | 0.0400 |
| 4.173626374 | 0.936 | 0.896 | 0.0400 |
| 4.176147382 | 0.936 | 0.896 | 0.0400 |
| 4.176842889 | 0.936 | 0.896 | 0.0400 |
| 4.179499329 | 0.935 | 0.895 | 0.0400 |
| 4.18034257  | 0.935 | 0.895 | 0.0400 |

|             |       |       |        |
|-------------|-------|-------|--------|
| 4.181304571 | 0.935 | 0.895 | 0.0400 |
| 4.182745826 | 0.935 | 0.895 | 0.0400 |
| 4.187264094 | 0.934 | 0.894 | 0.0400 |
| 4.189212905 | 0.934 | 0.894 | 0.0400 |
| 4.191746261 | 0.934 | 0.894 | 0.0400 |
| 7.754860375 | 0.28  | 0.24  | 0.0400 |
| 7.766194332 | 0.279 | 0.239 | 0.0400 |
| 7.769507471 | 0.279 | 0.239 | 0.0400 |
| 7.770027221 | 0.279 | 0.239 | 0.0400 |
| 7.822854948 | 0.271 | 0.231 | 0.0400 |
| 7.823329332 | 0.271 | 0.231 | 0.0400 |
| 7.824808184 | 0.271 | 0.231 | 0.0400 |
| 7.829202366 | 0.27  | 0.23  | 0.0400 |
| 7.830072598 | 0.27  | 0.23  | 0.0400 |
| 7.831427831 | 0.27  | 0.23  | 0.0400 |
| 7.838918919 | 0.269 | 0.229 | 0.0400 |
| 7.840863309 | 0.269 | 0.229 | 0.0400 |
| 7.842431937 | 0.269 | 0.229 | 0.0400 |
| 7.846688034 | 0.268 | 0.228 | 0.0400 |
| 7.852100423 | 0.267 | 0.227 | 0.0400 |
| 7.852554865 | 0.267 | 0.227 | 0.0400 |
| 7.854951797 | 0.267 | 0.227 | 0.0400 |
| 7.862332193 | 0.266 | 0.226 | 0.0400 |
| 7.877750104 | 0.263 | 0.223 | 0.0400 |
| 7.879611331 | 0.263 | 0.223 | 0.0400 |
| 7.880614742 | 0.263 | 0.223 | 0.0400 |
| 7.881573822 | 0.263 | 0.223 | 0.0400 |
| 7.88278231  | 0.262 | 0.222 | 0.0400 |
| 7.883913532 | 0.262 | 0.222 | 0.0400 |
| 7.885969664 | 0.262 | 0.222 | 0.0400 |
| 7.935995904 | 0.255 | 0.215 | 0.0400 |
| 7.937003968 | 0.255 | 0.215 | 0.0400 |
| 7.938215649 | 0.255 | 0.215 | 0.0400 |
| 7.684746997 | 0.291 | 0.251 | 0.0400 |
| 7.694638695 | 0.29  | 0.25  | 0.0400 |
| 7.697169059 | 0.29  | 0.25  | 0.0400 |
| 7.697605074 | 0.29  | 0.25  | 0.0400 |
| 7.698127213 | 0.29  | 0.25  | 0.0400 |
| 7.700557701 | 0.29  | 0.25  | 0.0400 |
| 7.721053611 | 0.287 | 0.247 | 0.0400 |
| 7.725705329 | 0.286 | 0.246 | 0.0400 |
| 7.727272727 | 0.286 | 0.246 | 0.0400 |
| 7.736537667 | 0.284 | 0.244 | 0.0400 |

|             |       |       |        |
|-------------|-------|-------|--------|
| 4.035616149 | 0.948 | 0.908 | 0.0400 |
| 4.037776723 | 0.948 | 0.908 | 0.0400 |
| 4.041926656 | 0.948 | 0.908 | 0.0400 |
| 4.045478036 | 0.948 | 0.908 | 0.0400 |
| 4.047065338 | 0.948 | 0.908 | 0.0400 |
| 4.129192746 | 0.941 | 0.901 | 0.0400 |
| 4.147034368 | 0.939 | 0.899 | 0.0400 |
| 4.148331721 | 0.939 | 0.899 | 0.0400 |
| 4.149468085 | 0.939 | 0.899 | 0.0400 |
| 4.150471698 | 0.938 | 0.898 | 0.0400 |
| 4.152394775 | 0.938 | 0.898 | 0.0400 |
| 4.154548648 | 0.938 | 0.898 | 0.0400 |
| 4.156277256 | 0.938 | 0.898 | 0.0400 |
| 4.157599054 | 0.938 | 0.898 | 0.0400 |
| 4.158386621 | 0.938 | 0.898 | 0.0400 |
| 4.160657526 | 0.937 | 0.898 | 0.0390 |
| 4.164551607 | 0.937 | 0.898 | 0.0390 |
| 4.166666667 | 0.937 | 0.898 | 0.0390 |
| 4.16864139  | 0.937 | 0.898 | 0.0390 |
| 7.827517162 | 0.27  | 0.231 | 0.0390 |
| 7.833281368 | 0.269 | 0.23  | 0.0390 |
| 7.8351079   | 0.269 | 0.23  | 0.0390 |
| 7.836829367 | 0.269 | 0.23  | 0.0390 |
| 7.844645551 | 0.268 | 0.229 | 0.0390 |
| 7.857142857 | 0.266 | 0.227 | 0.0390 |
| 7.859389039 | 0.266 | 0.227 | 0.0390 |
| 7.861852093 | 0.266 | 0.227 | 0.0390 |
| 7.86388198  | 0.265 | 0.226 | 0.0390 |
| 7.865511099 | 0.265 | 0.226 | 0.0390 |
| 7.866260163 | 0.265 | 0.226 | 0.0390 |
| 7.867156863 | 0.265 | 0.226 | 0.0390 |
| 7.868249759 | 0.265 | 0.226 | 0.0390 |
| 7.869337472 | 0.265 | 0.226 | 0.0390 |
| 7.871654084 | 0.264 | 0.225 | 0.0390 |
| 7.873670213 | 0.264 | 0.225 | 0.0390 |
| 7.888974472 | 0.261 | 0.222 | 0.0390 |
| 7.890890731 | 0.261 | 0.222 | 0.0390 |
| 7.892946652 | 0.261 | 0.222 | 0.0390 |
| 7.917870906 | 0.258 | 0.219 | 0.0390 |
| 7.919269116 | 0.258 | 0.219 | 0.0390 |
| 7.925227114 | 0.257 | 0.218 | 0.0390 |
| 7.927248677 | 0.257 | 0.218 | 0.0390 |
| 7.932183908 | 0.256 | 0.217 | 0.0390 |



|             |       |       |        |
|-------------|-------|-------|--------|
| 7.933608815 | 0.255 | 0.216 | 0.0390 |
| 7.934684084 | 0.255 | 0.216 | 0.0390 |
| 7.940053884 | 0.254 | 0.215 | 0.0390 |
| 7.942219441 | 0.254 | 0.215 | 0.0390 |
| 7.703203203 | 0.289 | 0.25  | 0.0390 |
| 7.704310868 | 0.289 | 0.25  | 0.0390 |
| 7.706625683 | 0.289 | 0.25  | 0.0390 |
| 7.715167549 | 0.288 | 0.249 | 0.0390 |
| 7.716292408 | 0.288 | 0.249 | 0.0390 |
| 7.718709525 | 0.287 | 0.248 | 0.0390 |
| 7.71994324  | 0.287 | 0.248 | 0.0390 |
| 7.722828459 | 0.286 | 0.247 | 0.0390 |
| 7.728667038 | 0.285 | 0.246 | 0.0390 |
| 7.730278902 | 0.285 | 0.246 | 0.0390 |
| 7.731914894 | 0.285 | 0.246 | 0.0390 |
| 4.010555927 | 0.951 | 0.912 | 0.0390 |
| 4.011308459 | 0.95  | 0.911 | 0.0390 |
| 4.011801977 | 0.95  | 0.911 | 0.0390 |
| 4.013030277 | 0.95  | 0.911 | 0.0390 |
| 4.014210712 | 0.95  | 0.911 | 0.0390 |
| 4.015902083 | 0.95  | 0.911 | 0.0390 |
| 4.018303002 | 0.95  | 0.911 | 0.0390 |
| 4.022363818 | 0.949 | 0.91  | 0.0390 |
| 4.023328572 | 0.949 | 0.91  | 0.0390 |
| 4.031012929 | 0.948 | 0.909 | 0.0390 |
| 4.032752261 | 0.948 | 0.909 | 0.0390 |
| 4.034589314 | 0.948 | 0.909 | 0.0390 |
| 4.048199768 | 0.947 | 0.908 | 0.0390 |
| 4.05003127  | 0.947 | 0.908 | 0.0390 |
| 4.052668053 | 0.947 | 0.908 | 0.0390 |
| 4.056012534 | 0.947 | 0.908 | 0.0390 |
| 4.058397272 | 0.947 | 0.908 | 0.0390 |
| 4.060661765 | 0.947 | 0.908 | 0.0390 |
| 4.08569368  | 0.944 | 0.905 | 0.0390 |
| 4.08703591  | 0.944 | 0.905 | 0.0390 |
| 4.088224052 | 0.944 | 0.905 | 0.0390 |
| 4.08853387  | 0.944 | 0.905 | 0.0390 |
| 4.091314841 | 0.944 | 0.905 | 0.0390 |
| 4.106478567 | 0.943 | 0.904 | 0.0390 |
| 4.124002563 | 0.941 | 0.902 | 0.0390 |
| 4.124646893 | 0.941 | 0.902 | 0.0390 |
| 4.125437063 | 0.941 | 0.902 | 0.0390 |
| 4.126429126 | 0.941 | 0.902 | 0.0390 |

|             |       |       |        |
|-------------|-------|-------|--------|
| 4.127445552 | 0.941 | 0.902 | 0.0390 |
| 4.128469617 | 0.941 | 0.902 | 0.0390 |
| 4.129894008 | 0.94  | 0.901 | 0.0390 |
| 4.132256497 | 0.94  | 0.901 | 0.0390 |
| 4.135312199 | 0.94  | 0.901 | 0.0390 |
| 4.13723861  | 0.94  | 0.901 | 0.0390 |
| 4.138732959 | 0.94  | 0.901 | 0.0390 |
| 4.139659915 | 0.94  | 0.901 | 0.0390 |
| 4.14089839  | 0.94  | 0.901 | 0.0390 |
| 4.144907281 | 0.939 | 0.9   | 0.0390 |
| 4.145709592 | 0.939 | 0.9   | 0.0390 |
| 7.870395114 | 0.264 | 0.226 | 0.0380 |
| 7.875856164 | 0.263 | 0.225 | 0.0380 |
| 7.894736842 | 0.26  | 0.222 | 0.0380 |
| 7.896643783 | 0.26  | 0.222 | 0.0380 |
| 7.898855194 | 0.26  | 0.222 | 0.0380 |
| 7.901192735 | 0.26  | 0.222 | 0.0380 |
| 7.907736738 | 0.259 | 0.221 | 0.0380 |
| 7.909472247 | 0.259 | 0.221 | 0.0380 |
| 7.910920083 | 0.259 | 0.221 | 0.0380 |
| 7.912530735 | 0.258 | 0.22  | 0.0380 |
| 7.915167866 | 0.258 | 0.22  | 0.0380 |
| 7.919731544 | 0.257 | 0.219 | 0.0380 |
| 7.921038961 | 0.257 | 0.219 | 0.0380 |
| 7.923303112 | 0.257 | 0.219 | 0.0380 |
| 7.929802956 | 0.256 | 0.218 | 0.0380 |
| 7.945141139 | 0.253 | 0.215 | 0.0380 |
| 7.94891977  | 0.253 | 0.215 | 0.0380 |
| 7.951787789 | 0.253 | 0.215 | 0.0380 |
| 7.95365068  | 0.253 | 0.215 | 0.0380 |
| 7.962927648 | 0.251 | 0.213 | 0.0380 |
| 7.964594068 | 0.251 | 0.213 | 0.0380 |
| 8.096698802 | 0.23  | 0.192 | 0.0380 |
| 8.098375529 | 0.23  | 0.192 | 0.0380 |
| 8.099928686 | 0.229 | 0.191 | 0.0380 |
| 8.101727802 | 0.229 | 0.191 | 0.0380 |
| 8.104125194 | 0.229 | 0.191 | 0.0380 |
| 8.107084357 | 0.229 | 0.191 | 0.0380 |
| 7.709128499 | 0.288 | 0.25  | 0.0380 |
| 7.710894035 | 0.288 | 0.25  | 0.0380 |
| 7.712141354 | 0.288 | 0.25  | 0.0380 |
| 7.713352007 | 0.288 | 0.25  | 0.0380 |
| 7.717328119 | 0.287 | 0.249 | 0.0380 |

|             |       |       |        |
|-------------|-------|-------|--------|
| 7.733854167 | 0.284 | 0.246 | 0.0380 |
| 7.735112028 | 0.284 | 0.246 | 0.0380 |
| 4.009325276 | 0.951 | 0.913 | 0.0380 |
| 4.009667476 | 0.951 | 0.913 | 0.0380 |
| 4.010158828 | 0.951 | 0.913 | 0.0380 |
| 4.010842099 | 0.95  | 0.912 | 0.0380 |
| 4.019619629 | 0.949 | 0.911 | 0.0380 |
| 4.020919816 | 0.949 | 0.911 | 0.0380 |
| 4.024412936 | 0.948 | 0.91  | 0.0380 |
| 4.027884739 | 0.948 | 0.91  | 0.0380 |
| 4.06396028  | 0.946 | 0.908 | 0.0380 |
| 4.065677313 | 0.946 | 0.908 | 0.0380 |
| 4.066459856 | 0.946 | 0.908 | 0.0380 |
| 4.067391128 | 0.946 | 0.908 | 0.0380 |
| 4.068782026 | 0.946 | 0.908 | 0.0380 |
| 4.070281951 | 0.946 | 0.908 | 0.0380 |
| 4.071480704 | 0.946 | 0.908 | 0.0380 |
| 4.082243561 | 0.945 | 0.907 | 0.0380 |
| 4.084138338 | 0.944 | 0.906 | 0.0380 |
| 4.084936448 | 0.944 | 0.906 | 0.0380 |
| 4.095172637 | 0.943 | 0.905 | 0.0380 |
| 4.097373099 | 0.943 | 0.905 | 0.0380 |
| 4.09954004  | 0.943 | 0.905 | 0.0380 |
| 4.10092151  | 0.943 | 0.905 | 0.0380 |
| 4.10244859  | 0.943 | 0.905 | 0.0380 |
| 4.103909914 | 0.943 | 0.905 | 0.0380 |
| 4.110204574 | 0.942 | 0.904 | 0.0380 |
| 4.111586692 | 0.942 | 0.904 | 0.0380 |
| 4.112980421 | 0.942 | 0.904 | 0.0380 |
| 4.115966387 | 0.942 | 0.904 | 0.0380 |
| 4.119008715 | 0.942 | 0.904 | 0.0380 |
| 4.120624746 | 0.942 | 0.904 | 0.0380 |
| 4.121045621 | 0.942 | 0.904 | 0.0380 |
| 4.123467045 | 0.941 | 0.903 | 0.0380 |
| 4.142829122 | 0.939 | 0.901 | 0.0380 |
| 4.144191625 | 0.939 | 0.901 | 0.0380 |
| 7.905101275 | 0.259 | 0.222 | 0.0370 |
| 7.955374917 | 0.252 | 0.215 | 0.0370 |
| 7.958465076 | 0.251 | 0.214 | 0.0370 |
| 7.959854995 | 0.251 | 0.214 | 0.0370 |
| 7.961154878 | 0.251 | 0.214 | 0.0370 |
| 7.965608987 | 0.25  | 0.213 | 0.0370 |
| 7.966567331 | 0.25  | 0.213 | 0.0370 |

|             |       |       |        |
|-------------|-------|-------|--------|
| 7.967891484 | 0.25  | 0.213 | 0.0370 |
| 8.086670839 | 0.231 | 0.194 | 0.0370 |
| 8.109172164 | 0.228 | 0.191 | 0.0370 |
| 8.111062166 | 0.228 | 0.191 | 0.0370 |
| 8.113980823 | 0.227 | 0.19  | 0.0370 |
| 8.115348064 | 0.227 | 0.19  | 0.0370 |
| 8.11812139  | 0.227 | 0.19  | 0.0370 |
| 8.123106061 | 0.226 | 0.189 | 0.0370 |
| 3.995192308 | 0.952 | 0.915 | 0.0370 |
| 4.004405286 | 0.951 | 0.914 | 0.0370 |
| 4.009013581 | 0.951 | 0.914 | 0.0370 |
| 4.073119511 | 0.945 | 0.908 | 0.0370 |
| 4.074951729 | 0.945 | 0.908 | 0.0370 |
| 4.07595817  | 0.945 | 0.908 | 0.0370 |
| 4.078402223 | 0.945 | 0.908 | 0.0370 |
| 4.122217435 | 0.941 | 0.904 | 0.0370 |
| 7.956975429 | 0.251 | 0.215 | 0.0360 |
| 7.969337406 | 0.249 | 0.213 | 0.0360 |
| 7.970469652 | 0.249 | 0.213 | 0.0360 |
| 7.973414591 | 0.248 | 0.212 | 0.0360 |
| 7.974269877 | 0.248 | 0.212 | 0.0360 |
| 8.028683047 | 0.24  | 0.204 | 0.0360 |
| 8.029750055 | 0.24  | 0.204 | 0.0360 |
| 8.071858864 | 0.233 | 0.197 | 0.0360 |
| 8.073181615 | 0.233 | 0.197 | 0.0360 |
| 8.074304118 | 0.233 | 0.197 | 0.0360 |
| 8.078196638 | 0.232 | 0.196 | 0.0360 |
| 8.079735099 | 0.232 | 0.196 | 0.0360 |
| 8.083649082 | 0.231 | 0.195 | 0.0360 |
| 8.089919174 | 0.23  | 0.194 | 0.0360 |
| 8.093420574 | 0.23  | 0.194 | 0.0360 |
| 8.11254783  | 0.227 | 0.191 | 0.0360 |
| 8.120553061 | 0.226 | 0.19  | 0.0360 |
| 8.121008745 | 0.226 | 0.19  | 0.0360 |
| 8.127016129 | 0.225 | 0.189 | 0.0360 |
| 8.12926433  | 0.225 | 0.189 | 0.0360 |
| 8.03739225  | 0.239 | 0.203 | 0.0360 |
| 8.038595185 | 0.239 | 0.203 | 0.0360 |
| 8.039878113 | 0.239 | 0.203 | 0.0360 |
| 8.043535412 | 0.238 | 0.202 | 0.0360 |
| 8.045544897 | 0.238 | 0.202 | 0.0360 |
| 8.046426006 | 0.238 | 0.202 | 0.0360 |
| 8.065591398 | 0.235 | 0.199 | 0.0360 |

|             |       |       |        |
|-------------|-------|-------|--------|
| 3.989727827 | 0.952 | 0.916 | 0.0360 |
| 7.971521232 | 0.248 | 0.213 | 0.0350 |
| 7.972500473 | 0.248 | 0.213 | 0.0350 |
| 7.975071834 | 0.247 | 0.212 | 0.0350 |
| 7.9793267   | 0.247 | 0.212 | 0.0350 |
| 7.983532123 | 0.247 | 0.212 | 0.0350 |
| 7.984183546 | 0.247 | 0.212 | 0.0350 |
| 7.984785375 | 0.247 | 0.212 | 0.0350 |
| 8.019253474 | 0.241 | 0.206 | 0.0350 |
| 8.022288446 | 0.241 | 0.206 | 0.0350 |
| 8.02445733  | 0.241 | 0.206 | 0.0350 |
| 8.030899547 | 0.239 | 0.204 | 0.0350 |
| 8.032141474 | 0.239 | 0.204 | 0.0350 |
| 8.034798351 | 0.239 | 0.204 | 0.0350 |
| 8.066946779 | 0.234 | 0.199 | 0.0350 |
| 8.068096204 | 0.234 | 0.199 | 0.0350 |
| 8.070197044 | 0.234 | 0.199 | 0.0350 |
| 8.075728619 | 0.232 | 0.197 | 0.0350 |
| 8.08109589  | 0.231 | 0.196 | 0.0350 |
| 8.131414868 | 0.224 | 0.189 | 0.0350 |
| 8.133830846 | 0.224 | 0.189 | 0.0350 |
| 8.143284859 | 0.222 | 0.187 | 0.0350 |
| 8.144436933 | 0.222 | 0.187 | 0.0350 |
| 8.145428327 | 0.222 | 0.187 | 0.0350 |
| 8.146921756 | 0.222 | 0.187 | 0.0350 |
| 8.14941654  | 0.221 | 0.186 | 0.0350 |
| 8.154937261 | 0.22  | 0.185 | 0.0350 |
| 8.156961553 | 0.219 | 0.184 | 0.0350 |
| 8.158947368 | 0.219 | 0.184 | 0.0350 |
| 8.160882353 | 0.219 | 0.184 | 0.0350 |
| 8.041249291 | 0.238 | 0.203 | 0.0350 |
| 8.047827744 | 0.237 | 0.202 | 0.0350 |
| 8.049547477 | 0.237 | 0.202 | 0.0350 |
| 8.05200287  | 0.237 | 0.202 | 0.0350 |
| 8.054623415 | 0.236 | 0.201 | 0.0350 |
| 8.056349206 | 0.236 | 0.201 | 0.0350 |
| 8.057348407 | 0.236 | 0.201 | 0.0350 |
| 8.058627725 | 0.236 | 0.201 | 0.0350 |
| 8.060153777 | 0.235 | 0.2   | 0.0350 |
| 8.061310782 | 0.235 | 0.2   | 0.0350 |
| 8.063265816 | 0.235 | 0.2   | 0.0350 |
| 3.942016807 | 0.957 | 0.922 | 0.0350 |
| 3.943650794 | 0.957 | 0.922 | 0.0350 |

|             |       |       |        |
|-------------|-------|-------|--------|
| 3.944699286 | 0.957 | 0.922 | 0.0350 |
| 3.945450037 | 0.957 | 0.922 | 0.0350 |
| 3.946657183 | 0.957 | 0.922 | 0.0350 |
| 3.948043185 | 0.957 | 0.922 | 0.0350 |
| 3.95039761  | 0.956 | 0.921 | 0.0350 |
| 3.952052828 | 0.956 | 0.921 | 0.0350 |
| 3.954016913 | 0.956 | 0.921 | 0.0350 |
| 3.955294705 | 0.956 | 0.921 | 0.0350 |
| 3.957188645 | 0.956 | 0.921 | 0.0350 |
| 3.958333333 | 0.956 | 0.921 | 0.0350 |
| 3.961195809 | 0.955 | 0.92  | 0.0350 |
| 3.961808404 | 0.955 | 0.92  | 0.0350 |
| 3.962698896 | 0.955 | 0.92  | 0.0350 |
| 3.963548802 | 0.955 | 0.92  | 0.0350 |
| 3.965998844 | 0.954 | 0.919 | 0.0350 |
| 3.969051607 | 0.953 | 0.918 | 0.0350 |
| 3.970905932 | 0.953 | 0.918 | 0.0350 |
| 3.972282678 | 0.953 | 0.918 | 0.0350 |
| 3.973749069 | 0.953 | 0.918 | 0.0350 |
| 3.975399506 | 0.953 | 0.918 | 0.0350 |
| 3.976588171 | 0.953 | 0.918 | 0.0350 |
| 3.977272727 | 0.953 | 0.918 | 0.0350 |
| 3.982386916 | 0.952 | 0.917 | 0.0350 |
| 3.986008051 | 0.952 | 0.917 | 0.0350 |
| 3.988052909 | 0.952 | 0.917 | 0.0350 |
| 3.988917542 | 0.952 | 0.917 | 0.0350 |
| 7.985343069 | 0.246 | 0.212 | 0.0340 |
| 8.013941514 | 0.242 | 0.208 | 0.0340 |
| 8.01444514  | 0.242 | 0.208 | 0.0340 |
| 8.014986529 | 0.241 | 0.207 | 0.0340 |
| 8.015570096 | 0.241 | 0.207 | 0.0340 |
| 8.016200971 | 0.241 | 0.207 | 0.0340 |
| 8.026763337 | 0.24  | 0.206 | 0.0340 |
| 8.027689949 | 0.24  | 0.206 | 0.0340 |
| 8.13548716  | 0.223 | 0.189 | 0.0340 |
| 8.137288499 | 0.223 | 0.189 | 0.0340 |
| 8.138732959 | 0.223 | 0.189 | 0.0340 |
| 8.140280262 | 0.223 | 0.189 | 0.0340 |
| 8.141941392 | 0.223 | 0.189 | 0.0340 |
| 8.151775587 | 0.22  | 0.186 | 0.0340 |
| 8.153356198 | 0.22  | 0.186 | 0.0340 |
| 8.162515006 | 0.218 | 0.184 | 0.0340 |
| 8.163911134 | 0.218 | 0.184 | 0.0340 |

|             |       |       |        |
|-------------|-------|-------|--------|
| 8.165611814 | 0.218 | 0.184 | 0.0340 |
| 8.167302799 | 0.218 | 0.184 | 0.0340 |
| 3.911967284 | 0.959 | 0.925 | 0.0340 |
| 3.915981199 | 0.959 | 0.925 | 0.0340 |
| 3.919258454 | 0.959 | 0.925 | 0.0340 |
| 3.938723518 | 0.957 | 0.923 | 0.0340 |
| 3.940285205 | 0.957 | 0.923 | 0.0340 |
| 3.949358974 | 0.956 | 0.922 | 0.0340 |
| 3.950088968 | 0.956 | 0.922 | 0.0340 |
| 3.959032438 | 0.955 | 0.921 | 0.0340 |
| 3.960385252 | 0.955 | 0.921 | 0.0340 |
| 3.964230503 | 0.954 | 0.92  | 0.0340 |
| 3.965007141 | 0.954 | 0.92  | 0.0340 |
| 3.967367208 | 0.953 | 0.919 | 0.0340 |
| 3.977883675 | 0.952 | 0.918 | 0.0340 |
| 3.979297063 | 0.952 | 0.918 | 0.0340 |
| 7.985861311 | 0.245 | 0.212 | 0.0330 |
| 7.986344146 | 0.245 | 0.212 | 0.0330 |
| 7.986795084 | 0.244 | 0.211 | 0.0330 |
| 7.987217185 | 0.244 | 0.211 | 0.0330 |
| 7.993710692 | 0.244 | 0.211 | 0.0330 |
| 8.006410256 | 0.242 | 0.209 | 0.0330 |
| 8.013032773 | 0.242 | 0.209 | 0.0330 |
| 8.013471832 | 0.242 | 0.209 | 0.0330 |
| 8.168476508 | 0.217 | 0.184 | 0.0330 |
| 8.174892828 | 0.216 | 0.183 | 0.0330 |
| 8.175429079 | 0.216 | 0.183 | 0.0330 |
| 8.175888152 | 0.216 | 0.183 | 0.0330 |
| 8.178959405 | 0.216 | 0.183 | 0.0330 |
| 8.184868822 | 0.215 | 0.182 | 0.0330 |
| 3.901412942 | 0.96  | 0.927 | 0.0330 |
| 3.921124962 | 0.958 | 0.925 | 0.0330 |
| 3.924516151 | 0.958 | 0.925 | 0.0330 |
| 3.927475898 | 0.958 | 0.925 | 0.0330 |
| 3.928571429 | 0.958 | 0.925 | 0.0330 |
| 3.929459844 | 0.958 | 0.925 | 0.0330 |
| 3.932387244 | 0.958 | 0.925 | 0.0330 |
| 3.936342593 | 0.957 | 0.924 | 0.0330 |
| 3.937661917 | 0.957 | 0.924 | 0.0330 |
| 3.937938466 | 0.957 | 0.924 | 0.0330 |
| 8.17180863  | 0.216 | 0.184 | 0.0320 |
| 8.18816263  | 0.214 | 0.182 | 0.0320 |
| 8.188691088 | 0.214 | 0.182 | 0.0320 |

|             |       |       |        |
|-------------|-------|-------|--------|
| 8.190873731 | 0.214 | 0.182 | 0.0320 |
| 8.193159736 | 0.214 | 0.182 | 0.0320 |
| 8.193996416 | 0.214 | 0.182 | 0.0320 |
| 8.204126603 | 0.212 | 0.18  | 0.0320 |
| 8.206012378 | 0.212 | 0.18  | 0.0320 |
| 8.207925888 | 0.212 | 0.18  | 0.0320 |
| 8.210168669 | 0.211 | 0.179 | 0.0320 |
| 8.211651322 | 0.211 | 0.179 | 0.0320 |
| 8.213103122 | 0.211 | 0.179 | 0.0320 |
| 8.225317283 | 0.209 | 0.177 | 0.0320 |
| 8.228859793 | 0.209 | 0.177 | 0.0320 |
| 3.896392367 | 0.96  | 0.928 | 0.0320 |
| 3.897870491 | 0.96  | 0.928 | 0.0320 |
| 3.898693827 | 0.96  | 0.928 | 0.0320 |
| 3.903926452 | 0.959 | 0.927 | 0.0320 |
| 3.904435747 | 0.959 | 0.927 | 0.0320 |
| 3.905170652 | 0.959 | 0.927 | 0.0320 |
| 3.90710442  | 0.959 | 0.927 | 0.0320 |
| 3.909760265 | 0.959 | 0.927 | 0.0320 |
| 3.934805707 | 0.957 | 0.925 | 0.0320 |
| 8.194966583 | 0.213 | 0.182 | 0.0310 |
| 8.197123243 | 0.213 | 0.182 | 0.0310 |
| 8.200098306 | 0.213 | 0.182 | 0.0310 |
| 8.216731898 | 0.21  | 0.179 | 0.0310 |
| 8.222953216 | 0.209 | 0.178 | 0.0310 |
| 8.231030874 | 0.208 | 0.177 | 0.0310 |
| 8.231499917 | 0.208 | 0.177 | 0.0310 |
| 8.233500717 | 0.208 | 0.177 | 0.0310 |
| 8.235294118 | 0.208 | 0.177 | 0.0310 |
| 3.879143047 | 0.961 | 0.93  | 0.0310 |
| 3.881854996 | 0.961 | 0.93  | 0.0310 |
| 3.885195727 | 0.961 | 0.93  | 0.0310 |
| 3.887675885 | 0.961 | 0.93  | 0.0310 |
| 3.890145802 | 0.961 | 0.93  | 0.0310 |
| 3.891758754 | 0.96  | 0.929 | 0.0310 |
| 3.89205373  | 0.96  | 0.929 | 0.0310 |
| 3.893223169 | 0.96  | 0.929 | 0.0310 |
| 3.894483806 | 0.96  | 0.929 | 0.0310 |
| 3.89504284  | 0.96  | 0.929 | 0.0310 |
| 8.202281924 | 0.212 | 0.182 | 0.0300 |
| 8.219758533 | 0.209 | 0.179 | 0.0300 |
| 8.221280603 | 0.209 | 0.179 | 0.0300 |
| 8.237143914 | 0.207 | 0.177 | 0.0300 |



|             |       |       |        |
|-------------|-------|-------|--------|
| 8.239215165 | 0.207 | 0.177 | 0.0300 |
| 8.243759026 | 0.206 | 0.176 | 0.0300 |
| 8.245514028 | 0.206 | 0.176 | 0.0300 |
| 8.247464215 | 0.206 | 0.176 | 0.0300 |
| 3.819660098 | 0.965 | 0.935 | 0.0300 |
| 3.821877065 | 0.965 | 0.935 | 0.0300 |
| 3.823529412 | 0.965 | 0.935 | 0.0300 |
| 3.824643494 | 0.965 | 0.935 | 0.0300 |
| 3.829046453 | 0.965 | 0.935 | 0.0300 |
| 3.834406658 | 0.965 | 0.935 | 0.0300 |
| 3.868486074 | 0.962 | 0.932 | 0.0300 |
| 3.877578328 | 0.961 | 0.931 | 0.0300 |
| 3.891514165 | 0.96  | 0.93  | 0.0300 |
| 8.23971831  | 0.206 | 0.177 | 0.0290 |
| 8.241621622 | 0.206 | 0.177 | 0.0290 |
| 8.249961717 | 0.205 | 0.176 | 0.0290 |
| 8.252858253 | 0.205 | 0.176 | 0.0290 |
| 8.254500906 | 0.205 | 0.176 | 0.0290 |
| 3.837430913 | 0.964 | 0.935 | 0.0290 |
| 3.838623199 | 0.964 | 0.935 | 0.0290 |
| 3.840335234 | 0.964 | 0.935 | 0.0290 |
| 3.842086221 | 0.964 | 0.935 | 0.0290 |
| 3.842579646 | 0.964 | 0.935 | 0.0290 |
| 3.842884983 | 0.964 | 0.935 | 0.0290 |
| 3.85013369  | 0.963 | 0.934 | 0.0290 |
| 3.86005712  | 0.962 | 0.933 | 0.0290 |
| 3.863222249 | 0.962 | 0.933 | 0.0290 |
| 3.866951955 | 0.962 | 0.933 | 0.0290 |
| 3.869197176 | 0.961 | 0.932 | 0.0290 |
| 3.870157238 | 0.961 | 0.932 | 0.0290 |
| 3.873809862 | 0.961 | 0.932 | 0.0290 |
| 3.784415256 | 0.968 | 0.94  | 0.0280 |
| 3.785178732 | 0.968 | 0.94  | 0.0280 |
| 3.802450117 | 0.966 | 0.938 | 0.0280 |
| 3.803248942 | 0.966 | 0.938 | 0.0280 |
| 3.806602396 | 0.966 | 0.938 | 0.0280 |
| 3.810839253 | 0.966 | 0.938 | 0.0280 |
| 3.812327348 | 0.966 | 0.938 | 0.0280 |
| 3.813764451 | 0.966 | 0.938 | 0.0280 |
| 8.277003882 | 0.202 | 0.174 | 0.0280 |
| 8.282416045 | 0.201 | 0.173 | 0.0280 |
| 8.255423755 | 0.204 | 0.176 | 0.0280 |
| 8.256694856 | 0.204 | 0.176 | 0.0280 |

|             |       |       |        |
|-------------|-------|-------|--------|
| 8.257820137 | 0.204 | 0.176 | 0.0280 |
| 8.259467041 | 0.204 | 0.176 | 0.0280 |
| 8.29543497  | 0.199 | 0.171 | 0.0280 |
| 8.297084318 | 0.198 | 0.17  | 0.0280 |
| 3.81769306  | 0.965 | 0.937 | 0.0280 |
| 3.818638648 | 0.965 | 0.937 | 0.0280 |
| 3.844564526 | 0.963 | 0.935 | 0.0280 |
| 3.846153846 | 0.963 | 0.935 | 0.0280 |
| 3.847959552 | 0.963 | 0.935 | 0.0280 |
| 3.849882629 | 0.963 | 0.935 | 0.0280 |
| 3.850421046 | 0.962 | 0.934 | 0.0280 |
| 3.852661658 | 0.962 | 0.934 | 0.0280 |
| 3.856308312 | 0.962 | 0.934 | 0.0280 |
| 3.858758572 | 0.962 | 0.934 | 0.0280 |
| 3.759750177 | 0.969 | 0.942 | 0.0270 |
| 3.763163729 | 0.969 | 0.942 | 0.0270 |
| 3.763742902 | 0.969 | 0.942 | 0.0270 |
| 3.764738521 | 0.969 | 0.942 | 0.0270 |
| 3.76643698  | 0.969 | 0.942 | 0.0270 |
| 3.767778901 | 0.969 | 0.942 | 0.0270 |
| 3.771609207 | 0.968 | 0.941 | 0.0270 |
| 3.775681342 | 0.968 | 0.941 | 0.0270 |
| 3.778423773 | 0.968 | 0.941 | 0.0270 |
| 3.780726594 | 0.968 | 0.941 | 0.0270 |
| 3.783083602 | 0.968 | 0.941 | 0.0270 |
| 3.785859251 | 0.967 | 0.94  | 0.0270 |
| 3.787940726 | 0.967 | 0.94  | 0.0270 |
| 3.790341238 | 0.967 | 0.94  | 0.0270 |
| 3.79215612  | 0.967 | 0.94  | 0.0270 |
| 3.793873153 | 0.967 | 0.94  | 0.0270 |
| 3.79571715  | 0.967 | 0.94  | 0.0270 |
| 3.798297496 | 0.966 | 0.939 | 0.0270 |
| 3.799563319 | 0.966 | 0.939 | 0.0270 |
| 3.801041667 | 0.966 | 0.939 | 0.0270 |
| 3.815727011 | 0.965 | 0.938 | 0.0270 |
| 3.816814711 | 0.965 | 0.938 | 0.0270 |
| 8.262379227 | 0.203 | 0.176 | 0.0270 |
| 8.264175849 | 0.203 | 0.176 | 0.0270 |
| 8.265564738 | 0.203 | 0.176 | 0.0270 |
| 8.269196614 | 0.202 | 0.175 | 0.0270 |
| 8.272028993 | 0.202 | 0.175 | 0.0270 |
| 8.274621682 | 0.202 | 0.175 | 0.0270 |
| 8.27841711  | 0.201 | 0.174 | 0.0270 |

|             |       |       |        |
|-------------|-------|-------|--------|
| 8.279969262 | 0.201 | 0.174 | 0.0270 |
| 8.284648188 | 0.2   | 0.173 | 0.0270 |
| 8.289405237 | 0.199 | 0.172 | 0.0270 |
| 8.291911084 | 0.199 | 0.172 | 0.0270 |
| 8.293628285 | 0.199 | 0.172 | 0.0270 |
| 8.298596034 | 0.197 | 0.17  | 0.0270 |
| 8.299986661 | 0.197 | 0.17  | 0.0270 |
| 8.303552604 | 0.197 | 0.17  | 0.0270 |
| 8.307637571 | 0.197 | 0.17  | 0.0270 |
| 8.309341342 | 0.196 | 0.169 | 0.0270 |
| 8.320889285 | 0.195 | 0.168 | 0.0270 |
| 8.321912986 | 0.194 | 0.167 | 0.0270 |
| 3.75        | 0.97  | 0.944 | 0.0260 |
| 3.756479467 | 0.969 | 0.943 | 0.0260 |
| 3.768874725 | 0.968 | 0.942 | 0.0260 |
| 3.797129899 | 0.966 | 0.94  | 0.0260 |
| 8.267191601 | 0.202 | 0.176 | 0.0260 |
| 8.286692759 | 0.199 | 0.173 | 0.0260 |
| 8.310773733 | 0.195 | 0.169 | 0.0260 |
| 8.315508021 | 0.195 | 0.169 | 0.0260 |
| 8.319969209 | 0.195 | 0.169 | 0.0260 |
| 8.321423102 | 0.194 | 0.168 | 0.0260 |
| 8.322364148 | 0.193 | 0.167 | 0.0260 |
| 8.327956989 | 0.193 | 0.167 | 0.0260 |
| 8.333333333 | 0.193 | 0.167 | 0.0260 |
| 8.3382643   | 0.192 | 0.166 | 0.0260 |
| 8.345075664 | 0.191 | 0.165 | 0.0260 |
| 8.345594201 | 0.191 | 0.165 | 0.0260 |
| 8.369582348 | 0.189 | 0.163 | 0.0260 |
| 3.744465898 | 0.97  | 0.945 | 0.0250 |
| 3.747427984 | 0.97  | 0.945 | 0.0250 |
| 3.753172589 | 0.969 | 0.944 | 0.0250 |
| 8.343376774 | 0.191 | 0.166 | 0.0250 |
| 8.343753663 | 0.191 | 0.166 | 0.0250 |
| 8.344159953 | 0.191 | 0.166 | 0.0250 |
| 8.344599224 | 0.191 | 0.166 | 0.0250 |
| 8.346160677 | 0.19  | 0.165 | 0.0250 |
| 8.346782065 | 0.19  | 0.165 | 0.0250 |
| 8.351185298 | 0.19  | 0.165 | 0.0250 |
| 8.355713771 | 0.19  | 0.165 | 0.0250 |
| 8.35665362  | 0.19  | 0.165 | 0.0250 |
| 8.357675906 | 0.19  | 0.165 | 0.0250 |
| 8.371231697 | 0.188 | 0.163 | 0.0250 |

|             |       |       |        |
|-------------|-------|-------|--------|
| 8.373038382 | 0.188 | 0.163 | 0.0250 |
| 8.51982264  | 0.171 | 0.147 | 0.0240 |
| 8.361494415 | 0.189 | 0.165 | 0.0240 |
| 8.365396473 | 0.189 | 0.165 | 0.0240 |
| 8.366680005 | 0.189 | 0.165 | 0.0240 |
| 8.368070633 | 0.189 | 0.165 | 0.0240 |
| 8.37449187  | 0.187 | 0.163 | 0.0240 |
| 8.375811688 | 0.187 | 0.163 | 0.0240 |
| 8.377500878 | 0.187 | 0.163 | 0.0240 |
| 8.379330034 | 0.187 | 0.163 | 0.0240 |
| 8.381317316 | 0.187 | 0.163 | 0.0240 |
| 8.38817926  | 0.186 | 0.162 | 0.0240 |
| 8.390435068 | 0.186 | 0.162 | 0.0240 |
| 8.392884488 | 0.186 | 0.162 | 0.0240 |
| 8.487028559 | 0.176 | 0.152 | 0.0240 |
| 8.493563294 | 0.174 | 0.15  | 0.0240 |
| 8.495108253 | 0.174 | 0.15  | 0.0240 |
| 8.496486314 | 0.174 | 0.15  | 0.0240 |
| 8.496920926 | 0.174 | 0.15  | 0.0240 |
| 8.50170068  | 0.173 | 0.149 | 0.0240 |
| 8.581824918 | 0.164 | 0.14  | 0.0240 |
| 3.713127117 | 0.972 | 0.949 | 0.0230 |
| 3.733026114 | 0.971 | 0.948 | 0.0230 |
| 3.735087719 | 0.971 | 0.948 | 0.0230 |
| 3.738724096 | 0.97  | 0.947 | 0.0230 |
| 3.739483917 | 0.97  | 0.947 | 0.0230 |
| 3.741263728 | 0.97  | 0.947 | 0.0230 |
| 3.743002783 | 0.97  | 0.947 | 0.0230 |
| 3.743695669 | 0.97  | 0.947 | 0.0230 |
| 8.516054258 | 0.171 | 0.148 | 0.0230 |
| 8.517501018 | 0.171 | 0.148 | 0.0230 |
| 8.522308347 | 0.17  | 0.147 | 0.0230 |
| 8.524040048 | 0.17  | 0.147 | 0.0230 |
| 8.525115595 | 0.17  | 0.147 | 0.0230 |
| 8.526386404 | 0.17  | 0.147 | 0.0230 |
| 8.549002709 | 0.168 | 0.145 | 0.0230 |
| 8.550171479 | 0.168 | 0.145 | 0.0230 |
| 8.561867669 | 0.166 | 0.143 | 0.0230 |
| 8.562295752 | 0.166 | 0.143 | 0.0230 |
| 8.566964286 | 0.166 | 0.143 | 0.0230 |
| 8.575837743 | 0.165 | 0.142 | 0.0230 |
| 8.383484163 | 0.186 | 0.163 | 0.0230 |
| 8.384854276 | 0.186 | 0.163 | 0.0230 |

|             |       |       |        |
|-------------|-------|-------|--------|
| 8.386094971 | 0.186 | 0.163 | 0.0230 |
| 8.395553574 | 0.185 | 0.162 | 0.0230 |
| 8.397191231 | 0.185 | 0.162 | 0.0230 |
| 8.398717949 | 0.185 | 0.162 | 0.0230 |
| 8.407444005 | 0.184 | 0.161 | 0.0230 |
| 8.483803553 | 0.176 | 0.153 | 0.0230 |
| 8.489887335 | 0.175 | 0.152 | 0.0230 |
| 8.491314765 | 0.175 | 0.152 | 0.0230 |
| 8.492607088 | 0.175 | 0.152 | 0.0230 |
| 8.498554913 | 0.173 | 0.15  | 0.0230 |
| 8.503669184 | 0.172 | 0.149 | 0.0230 |
| 8.506626889 | 0.172 | 0.149 | 0.0230 |
| 8.509977534 | 0.172 | 0.149 | 0.0230 |
| 8.512075906 | 0.172 | 0.149 | 0.0230 |
| 8.582383359 | 0.163 | 0.14  | 0.0230 |
| 8.583005249 | 0.163 | 0.14  | 0.0230 |
| 8.585784314 | 0.163 | 0.14  | 0.0230 |
| 8.588989442 | 0.163 | 0.14  | 0.0230 |
| 8.590173808 | 0.163 | 0.14  | 0.0230 |
| 3.71004233  | 0.972 | 0.95  | 0.0220 |
| 3.718388614 | 0.971 | 0.949 | 0.0220 |
| 3.722167244 | 0.971 | 0.949 | 0.0220 |
| 3.723947026 | 0.971 | 0.949 | 0.0220 |
| 3.724989996 | 0.971 | 0.949 | 0.0220 |
| 3.727609963 | 0.971 | 0.949 | 0.0220 |
| 3.730893573 | 0.971 | 0.949 | 0.0220 |
| 3.732388155 | 0.971 | 0.949 | 0.0220 |
| 3.737107921 | 0.97  | 0.948 | 0.0220 |
| 3.737845747 | 0.97  | 0.948 | 0.0220 |
| 8.514569257 | 0.171 | 0.149 | 0.0220 |
| 8.528271774 | 0.169 | 0.147 | 0.0220 |
| 8.530440148 | 0.169 | 0.147 | 0.0220 |
| 8.533250189 | 0.169 | 0.147 | 0.0220 |
| 8.536746693 | 0.169 | 0.147 | 0.0220 |
| 8.539303762 | 0.169 | 0.147 | 0.0220 |
| 8.540906326 | 0.168 | 0.146 | 0.0220 |
| 8.542985232 | 0.168 | 0.146 | 0.0220 |
| 8.544879171 | 0.168 | 0.146 | 0.0220 |
| 8.546920821 | 0.168 | 0.146 | 0.0220 |
| 8.551224388 | 0.167 | 0.145 | 0.0220 |
| 8.556165099 | 0.167 | 0.145 | 0.0220 |
| 8.56087857  | 0.167 | 0.145 | 0.0220 |
| 8.561397457 | 0.166 | 0.144 | 0.0220 |

|             |       |       |        |
|-------------|-------|-------|--------|
| 8.580663997 | 0.164 | 0.142 | 0.0220 |
| 8.581320682 | 0.164 | 0.142 | 0.0220 |
| 8.401388889 | 0.184 | 0.162 | 0.0220 |
| 8.40428744  | 0.184 | 0.162 | 0.0220 |
| 8.411442006 | 0.183 | 0.161 | 0.0220 |
| 8.415529645 | 0.183 | 0.161 | 0.0220 |
| 8.417493853 | 0.182 | 0.16  | 0.0220 |
| 8.419387075 | 0.182 | 0.16  | 0.0220 |
| 8.422647528 | 0.182 | 0.16  | 0.0220 |
| 8.424449979 | 0.182 | 0.16  | 0.0220 |
| 8.429401993 | 0.181 | 0.159 | 0.0220 |
| 8.430802554 | 0.181 | 0.159 | 0.0220 |
| 8.434436275 | 0.181 | 0.159 | 0.0220 |
| 8.456129096 | 0.179 | 0.157 | 0.0220 |
| 8.45895715  | 0.179 | 0.157 | 0.0220 |
| 8.477541031 | 0.177 | 0.155 | 0.0220 |
| 8.480506329 | 0.176 | 0.154 | 0.0220 |
| 8.481885639 | 0.176 | 0.154 | 0.0220 |
| 8.591076661 | 0.162 | 0.14  | 0.0220 |
| 8.592070944 | 0.162 | 0.14  | 0.0220 |
| 3.709298804 | 0.972 | 0.951 | 0.0210 |
| 8.424927192 | 0.181 | 0.16  | 0.0210 |
| 8.426434903 | 0.181 | 0.16  | 0.0210 |
| 8.428122192 | 0.181 | 0.16  | 0.0210 |
| 8.440306886 | 0.18  | 0.159 | 0.0210 |
| 8.443779108 | 0.18  | 0.159 | 0.0210 |
| 8.447028424 | 0.18  | 0.159 | 0.0210 |
| 8.450158314 | 0.18  | 0.159 | 0.0210 |
| 8.451158564 | 0.18  | 0.159 | 0.0210 |
| 8.453448728 | 0.179 | 0.158 | 0.0210 |
| 8.455583453 | 0.179 | 0.158 | 0.0210 |
| 8.464102564 | 0.178 | 0.157 | 0.0210 |
| 8.466909976 | 0.178 | 0.157 | 0.0210 |
| 8.46887076  | 0.178 | 0.157 | 0.0210 |
| 8.474521707 | 0.177 | 0.156 | 0.0210 |
| 8.479130435 | 0.176 | 0.155 | 0.0210 |
| 8.593171296 | 0.161 | 0.14  | 0.0210 |
| 8.594395661 | 0.161 | 0.14  | 0.0210 |
| 8.596883718 | 0.161 | 0.14  | 0.0210 |
| 8.599363057 | 0.161 | 0.14  | 0.0210 |
| 3.705733055 | 0.972 | 0.952 | 0.0200 |
| 3.706599713 | 0.972 | 0.952 | 0.0200 |
| 3.70811863  | 0.972 | 0.952 | 0.0200 |

|             |       |       |        |
|-------------|-------|-------|--------|
| 8.471405229 | 0.177 | 0.157 | 0.0200 |
| 8.600699301 | 0.16  | 0.14  | 0.0200 |
| 8.602169889 | 0.16  | 0.14  | 0.0200 |
| 8.607076157 | 0.159 | 0.139 | 0.0200 |
| 8.60843323  | 0.159 | 0.139 | 0.0200 |
| 8.610191317 | 0.159 | 0.139 | 0.0200 |
| 8.612124899 | 0.159 | 0.139 | 0.0200 |
| 8.613798259 | 0.159 | 0.139 | 0.0200 |
| 8.614921223 | 0.159 | 0.139 | 0.0200 |
| 8.626702589 | 0.157 | 0.137 | 0.0200 |
| 3.636363636 | 0.976 | 0.957 | 0.0190 |
| 3.657462125 | 0.974 | 0.955 | 0.0190 |
| 3.6591652   | 0.974 | 0.955 | 0.0190 |
| 3.661580076 | 0.974 | 0.955 | 0.0190 |
| 3.663981305 | 0.974 | 0.955 | 0.0190 |
| 3.666468991 | 0.974 | 0.955 | 0.0190 |
| 3.669613892 | 0.974 | 0.955 | 0.0190 |
| 3.675444596 | 0.973 | 0.954 | 0.0190 |
| 3.677857936 | 0.973 | 0.954 | 0.0190 |
| 3.680113439 | 0.973 | 0.954 | 0.0190 |
| 3.681286817 | 0.973 | 0.954 | 0.0190 |
| 3.681705111 | 0.973 | 0.954 | 0.0190 |
| 3.683014354 | 0.973 | 0.954 | 0.0190 |
| 3.685539607 | 0.973 | 0.954 | 0.0190 |
| 3.702502861 | 0.972 | 0.953 | 0.0190 |
| 8.604749277 | 0.159 | 0.14  | 0.0190 |
| 8.615868408 | 0.158 | 0.139 | 0.0190 |
| 8.61711919  | 0.158 | 0.139 | 0.0190 |
| 8.619555354 | 0.157 | 0.138 | 0.0190 |
| 8.62193903  | 0.157 | 0.138 | 0.0190 |
| 8.624571302 | 0.157 | 0.138 | 0.0190 |
| 8.628241619 | 0.156 | 0.137 | 0.0190 |
| 8.629584622 | 0.156 | 0.137 | 0.0190 |
| 8.630544684 | 0.156 | 0.137 | 0.0190 |
| 8.632022953 | 0.156 | 0.137 | 0.0190 |
| 8.633316949 | 0.156 | 0.137 | 0.0190 |
| 8.638181818 | 0.155 | 0.136 | 0.0190 |
| 8.641428571 | 0.155 | 0.136 | 0.0190 |
| 8.644736842 | 0.155 | 0.136 | 0.0190 |
| 3.611160771 | 0.978 | 0.96  | 0.0180 |
| 3.619910115 | 0.977 | 0.959 | 0.0180 |
| 3.622293791 | 0.977 | 0.959 | 0.0180 |
| 3.624094203 | 0.977 | 0.959 | 0.0180 |

|             |       |       |        |
|-------------|-------|-------|--------|
| 3.625686813 | 0.977 | 0.959 | 0.0180 |
| 3.627424991 | 0.976 | 0.958 | 0.0180 |
| 3.629240113 | 0.976 | 0.958 | 0.0180 |
| 3.630762815 | 0.976 | 0.958 | 0.0180 |
| 3.631802721 | 0.976 | 0.958 | 0.0180 |
| 3.634508349 | 0.976 | 0.958 | 0.0180 |
| 3.638458316 | 0.975 | 0.957 | 0.0180 |
| 3.640664847 | 0.975 | 0.957 | 0.0180 |
| 3.641197598 | 0.975 | 0.957 | 0.0180 |
| 3.642843147 | 0.975 | 0.957 | 0.0180 |
| 3.644256121 | 0.975 | 0.957 | 0.0180 |
| 3.644652129 | 0.975 | 0.957 | 0.0180 |
| 3.645090005 | 0.975 | 0.957 | 0.0180 |
| 3.648926237 | 0.974 | 0.956 | 0.0180 |
| 3.653590658 | 0.974 | 0.956 | 0.0180 |
| 3.67265234  | 0.973 | 0.955 | 0.0180 |
| 3.687878788 | 0.972 | 0.954 | 0.0180 |
| 3.690598291 | 0.972 | 0.954 | 0.0180 |
| 3.693979933 | 0.972 | 0.954 | 0.0180 |
| 3.69678442  | 0.972 | 0.954 | 0.0180 |
| 3.698273402 | 0.972 | 0.954 | 0.0180 |
| 3.699026051 | 0.972 | 0.954 | 0.0180 |
| 8.618153616 | 0.157 | 0.139 | 0.0180 |
| 8.634952005 | 0.155 | 0.137 | 0.0180 |
| 8.647632595 | 0.154 | 0.136 | 0.0180 |
| 8.650565459 | 0.154 | 0.136 | 0.0180 |
| 8.658127353 | 0.153 | 0.135 | 0.0180 |
| 8.659976954 | 0.153 | 0.135 | 0.0180 |
| 8.661694577 | 0.153 | 0.135 | 0.0180 |
| 3.609225875 | 0.978 | 0.961 | 0.0170 |
| 3.612734335 | 0.977 | 0.96  | 0.0170 |
| 3.615662139 | 0.977 | 0.96  | 0.0170 |
| 3.626658316 | 0.976 | 0.959 | 0.0170 |
| 3.645864518 | 0.974 | 0.957 | 0.0170 |
| 3.646733832 | 0.974 | 0.957 | 0.0170 |
| 8.655100195 | 0.153 | 0.136 | 0.0170 |
| 8.664319249 | 0.152 | 0.135 | 0.0170 |
| 8.668997669 | 0.152 | 0.135 | 0.0170 |
| 8.685170957 | 0.15  | 0.133 | 0.0170 |
| 8.68921954  | 0.15  | 0.133 | 0.0170 |
| 8.693979933 | 0.149 | 0.132 | 0.0170 |
| 8.697141155 | 0.149 | 0.132 | 0.0170 |
| 8.698908564 | 0.149 | 0.132 | 0.0170 |



|             |       |       |        |
|-------------|-------|-------|--------|
| 8.700738534 | 0.149 | 0.132 | 0.0170 |
| 3.598307845 | 0.978 | 0.962 | 0.0160 |
| 3.601568006 | 0.978 | 0.962 | 0.0160 |
| 3.60560427  | 0.978 | 0.962 | 0.0160 |
| 3.6074024   | 0.978 | 0.962 | 0.0160 |
| 3.608471537 | 0.978 | 0.962 | 0.0160 |
| 8.671601836 | 0.151 | 0.135 | 0.0160 |
| 8.673685844 | 0.151 | 0.135 | 0.0160 |
| 8.675983638 | 0.151 | 0.135 | 0.0160 |
| 8.677078269 | 0.151 | 0.135 | 0.0160 |
| 8.679120753 | 0.151 | 0.135 | 0.0160 |
| 8.681363049 | 0.151 | 0.135 | 0.0160 |
| 8.682402637 | 0.15  | 0.134 | 0.0160 |
| 8.683422628 | 0.15  | 0.134 | 0.0160 |
| 8.703663024 | 0.148 | 0.132 | 0.0160 |
| 8.706259482 | 0.148 | 0.132 | 0.0160 |
| 3.549212098 | 0.98  | 0.965 | 0.0150 |
| 3.55260603  | 0.98  | 0.965 | 0.0150 |
| 3.570665673 | 0.979 | 0.964 | 0.0150 |
| 3.579786302 | 0.979 | 0.964 | 0.0150 |
| 3.586779309 | 0.979 | 0.964 | 0.0150 |
| 3.591408591 | 0.979 | 0.964 | 0.0150 |
| 3.59632742  | 0.978 | 0.963 | 0.0150 |
| 3.59800722  | 0.978 | 0.963 | 0.0150 |
| 8.708580206 | 0.147 | 0.132 | 0.0150 |
| 8.710899316 | 0.147 | 0.132 | 0.0150 |
| 8.717082467 | 0.146 | 0.131 | 0.0150 |
| 8.718974359 | 0.146 | 0.131 | 0.0150 |
| 8.720902256 | 0.145 | 0.13  | 0.0150 |
| 8.722604383 | 0.145 | 0.13  | 0.0150 |
| 8.724118235 | 0.145 | 0.13  | 0.0150 |
| 8.725473432 | 0.145 | 0.13  | 0.0150 |
| 8.72813669  | 0.145 | 0.13  | 0.0150 |
| 8.730751007 | 0.145 | 0.13  | 0.0150 |
| 3.543167318 | 0.98  | 0.966 | 0.0140 |
| 3.554427524 | 0.979 | 0.965 | 0.0140 |
| 3.559386973 | 0.979 | 0.965 | 0.0140 |
| 3.563787413 | 0.979 | 0.965 | 0.0140 |
| 3.564965103 | 0.979 | 0.965 | 0.0140 |
| 3.593922417 | 0.978 | 0.964 | 0.0140 |
| 8.808735415 | 0.137 | 0.123 | 0.0140 |
| 8.813001813 | 0.136 | 0.122 | 0.0140 |
| 8.815302144 | 0.136 | 0.122 | 0.0140 |

|             |       |       |        |
|-------------|-------|-------|--------|
| 8.817616959 | 0.136 | 0.122 | 0.0140 |
| 8.825557809 | 0.135 | 0.121 | 0.0140 |
| 8.827855603 | 0.135 | 0.121 | 0.0140 |
| 8.837163058 | 0.134 | 0.12  | 0.0140 |
| 8.840842442 | 0.134 | 0.12  | 0.0140 |
| 8.844564526 | 0.134 | 0.12  | 0.0140 |
| 8.713203463 | 0.146 | 0.132 | 0.0140 |
| 8.715250965 | 0.146 | 0.132 | 0.0140 |
| 8.731868825 | 0.144 | 0.13  | 0.0140 |
| 8.73286385  | 0.144 | 0.13  | 0.0140 |
| 8.736745407 | 0.144 | 0.13  | 0.0140 |
| 8.740449111 | 0.144 | 0.13  | 0.0140 |
| 3.503729393 | 0.981 | 0.968 | 0.0130 |
| 3.511371289 | 0.981 | 0.968 | 0.0130 |
| 3.518570506 | 0.981 | 0.968 | 0.0130 |
| 3.527863777 | 0.98  | 0.967 | 0.0130 |
| 3.53101023  | 0.98  | 0.967 | 0.0130 |
| 3.535172272 | 0.98  | 0.967 | 0.0130 |
| 3.538098694 | 0.98  | 0.967 | 0.0130 |
| 3.539142274 | 0.98  | 0.967 | 0.0130 |
| 8.768673356 | 0.14  | 0.127 | 0.0130 |
| 8.771712159 | 0.14  | 0.127 | 0.0130 |
| 8.774851876 | 0.14  | 0.127 | 0.0130 |
| 8.777802186 | 0.139 | 0.126 | 0.0130 |
| 8.77955688  | 0.139 | 0.126 | 0.0130 |
| 8.781269543 | 0.139 | 0.126 | 0.0130 |
| 8.782917533 | 0.139 | 0.126 | 0.0130 |
| 8.786796537 | 0.138 | 0.125 | 0.0130 |
| 8.788843853 | 0.138 | 0.125 | 0.0130 |
| 8.792067579 | 0.138 | 0.125 | 0.0130 |
| 8.797163121 | 0.138 | 0.125 | 0.0130 |
| 8.801408451 | 0.138 | 0.125 | 0.0130 |
| 8.806958585 | 0.137 | 0.124 | 0.0130 |
| 8.81035631  | 0.136 | 0.123 | 0.0130 |
| 8.821486928 | 0.135 | 0.122 | 0.0130 |
| 8.823529412 | 0.135 | 0.122 | 0.0130 |
| 8.830120894 | 0.134 | 0.121 | 0.0130 |
| 8.833866613 | 0.134 | 0.121 | 0.0130 |
| 8.847537355 | 0.133 | 0.12  | 0.0130 |
| 8.850136107 | 0.133 | 0.12  | 0.0130 |
| 8.851905184 | 0.133 | 0.12  | 0.0130 |
| 8.852981101 | 0.133 | 0.12  | 0.0130 |
| 8.855323021 | 0.133 | 0.12  | 0.0130 |

|             |       |       |        |
|-------------|-------|-------|--------|
| 8.740999741 | 0.143 | 0.13  | 0.0130 |
| 8.741698553 | 0.143 | 0.13  | 0.0130 |
| 8.746069182 | 0.143 | 0.13  | 0.0130 |
| 8.765832932 | 0.141 | 0.128 | 0.0130 |
| 8.766678527 | 0.141 | 0.128 | 0.0130 |
| 8.767619615 | 0.141 | 0.128 | 0.0130 |
| 3.488977713 | 0.981 | 0.969 | 0.0120 |
| 3.493425546 | 0.981 | 0.969 | 0.0120 |
| 3.499785954 | 0.981 | 0.969 | 0.0120 |
| 3.519980618 | 0.98  | 0.968 | 0.0120 |
| 3.520767462 | 0.98  | 0.968 | 0.0120 |
| 3.523721275 | 0.98  | 0.968 | 0.0120 |
| 8.776244311 | 0.139 | 0.127 | 0.0120 |
| 8.784749035 | 0.138 | 0.126 | 0.0120 |
| 8.804393525 | 0.137 | 0.125 | 0.0120 |
| 8.86038961  | 0.132 | 0.12  | 0.0120 |
| 8.864442295 | 0.132 | 0.12  | 0.0120 |
| 8.865957447 | 0.132 | 0.12  | 0.0120 |
| 8.867857143 | 0.132 | 0.12  | 0.0120 |
| 8.754084967 | 0.142 | 0.13  | 0.0120 |
| 8.758395312 | 0.142 | 0.13  | 0.0120 |
| 8.758872389 | 0.142 | 0.13  | 0.0120 |
| 8.762197902 | 0.141 | 0.129 | 0.0120 |
| 8.765068991 | 0.141 | 0.129 | 0.0120 |
| 3.408085278 | 0.985 | 0.974 | 0.0110 |
| 3.410427807 | 0.985 | 0.974 | 0.0110 |
| 3.419069029 | 0.984 | 0.973 | 0.0110 |
| 3.422064777 | 0.984 | 0.973 | 0.0110 |
| 3.423867229 | 0.984 | 0.973 | 0.0110 |
| 3.426614481 | 0.984 | 0.973 | 0.0110 |
| 3.430703625 | 0.984 | 0.973 | 0.0110 |
| 3.433156108 | 0.984 | 0.973 | 0.0110 |
| 3.444917152 | 0.983 | 0.972 | 0.0110 |
| 3.45224853  | 0.983 | 0.972 | 0.0110 |
| 3.456834003 | 0.983 | 0.972 | 0.0110 |
| 3.457695367 | 0.983 | 0.972 | 0.0110 |
| 3.48777579  | 0.981 | 0.97  | 0.0110 |
| 8.870614035 | 0.131 | 0.12  | 0.0110 |
| 8.872709944 | 0.131 | 0.12  | 0.0110 |
| 8.876619718 | 0.131 | 0.12  | 0.0110 |
| 8.880298507 | 0.131 | 0.12  | 0.0110 |
| 8.881348914 | 0.13  | 0.119 | 0.0110 |
| 8.885233918 | 0.13  | 0.119 | 0.0110 |

|             |       |       |        |
|-------------|-------|-------|--------|
| 8.759407005 | 0.141 | 0.13  | 0.0110 |
| 3.379536371 | 0.986 | 0.976 | 0.0100 |
| 3.381468738 | 0.986 | 0.976 | 0.0100 |
| 3.382363545 | 0.986 | 0.976 | 0.0100 |
| 3.393125263 | 0.985 | 0.975 | 0.0100 |
| 3.398969452 | 0.985 | 0.975 | 0.0100 |
| 3.403944681 | 0.985 | 0.975 | 0.0100 |
| 3.412469179 | 0.984 | 0.974 | 0.0100 |
| 3.41512954  | 0.984 | 0.974 | 0.0100 |
| 3.434529608 | 0.983 | 0.973 | 0.0100 |
| 3.435740129 | 0.983 | 0.973 | 0.0100 |
| 3.438378825 | 0.983 | 0.973 | 0.0100 |
| 3.441209328 | 0.983 | 0.973 | 0.0100 |
| 3.458701692 | 0.982 | 0.972 | 0.0100 |
| 3.46049896  | 0.982 | 0.972 | 0.0100 |
| 3.462612806 | 0.982 | 0.972 | 0.0100 |
| 3.465511917 | 0.982 | 0.972 | 0.0100 |
| 3.468362219 | 0.982 | 0.972 | 0.0100 |
| 3.469853695 | 0.982 | 0.972 | 0.0100 |
| 3.471270928 | 0.982 | 0.972 | 0.0100 |
| 3.47489408  | 0.981 | 0.971 | 0.0100 |
| 3.477731618 | 0.981 | 0.971 | 0.0100 |
| 3.482350982 | 0.981 | 0.971 | 0.0100 |
| 3.485281385 | 0.981 | 0.971 | 0.0100 |
| 3.486446886 | 0.981 | 0.971 | 0.0100 |
| 8.880857948 | 0.13  | 0.12  | 0.0100 |
| 8.892720307 | 0.129 | 0.119 | 0.0100 |
| 8.896805274 | 0.129 | 0.119 | 0.0100 |
| 8.90003841  | 0.128 | 0.118 | 0.0100 |
| 8.902832415 | 0.128 | 0.118 | 0.0100 |
| 8.903667698 | 0.128 | 0.118 | 0.0100 |
| 8.904609539 | 0.128 | 0.118 | 0.0100 |
| 8.921970116 | 0.126 | 0.116 | 0.0100 |
| 8.925897166 | 0.125 | 0.115 | 0.0100 |
| 8.927372963 | 0.125 | 0.115 | 0.0100 |
| 8.929934569 | 0.125 | 0.115 | 0.0100 |
| 8.949208686 | 0.123 | 0.113 | 0.0100 |
| 8.953136416 | 0.123 | 0.113 | 0.0100 |
| 8.956778607 | 0.123 | 0.113 | 0.0100 |
| 8.959166667 | 0.123 | 0.113 | 0.0100 |
| 8.961481481 | 0.123 | 0.113 | 0.0100 |
| 3.350126904 | 0.987 | 0.978 | 0.0090 |
| 3.350802579 | 0.987 | 0.978 | 0.0090 |

|             |       |       |        |
|-------------|-------|-------|--------|
| 3.368085566 | 0.986 | 0.977 | 0.0090 |
| 3.371901195 | 0.986 | 0.977 | 0.0090 |
| 3.373750735 | 0.986 | 0.977 | 0.0090 |
| 3.376131687 | 0.986 | 0.977 | 0.0090 |
| 3.383271612 | 0.985 | 0.976 | 0.0090 |
| 3.384642709 | 0.985 | 0.976 | 0.0090 |
| 3.386461773 | 0.985 | 0.976 | 0.0090 |
| 3.387537458 | 0.985 | 0.976 | 0.0090 |
| 3.38854974  | 0.985 | 0.976 | 0.0090 |
| 3.473200313 | 0.981 | 0.972 | 0.0090 |
| 8.897348309 | 0.128 | 0.119 | 0.0090 |
| 8.905679745 | 0.127 | 0.118 | 0.0090 |
| 8.909646739 | 0.127 | 0.118 | 0.0090 |
| 8.91388608  | 0.127 | 0.118 | 0.0090 |
| 8.918058186 | 0.126 | 0.117 | 0.0090 |
| 8.919891114 | 0.126 | 0.117 | 0.0090 |
| 8.923563778 | 0.125 | 0.116 | 0.0090 |
| 8.924835234 | 0.125 | 0.116 | 0.0090 |
| 8.93286197  | 0.124 | 0.115 | 0.0090 |
| 8.935298221 | 0.124 | 0.115 | 0.0090 |
| 8.937782076 | 0.124 | 0.115 | 0.0090 |
| 8.941241685 | 0.124 | 0.115 | 0.0090 |
| 8.943880675 | 0.123 | 0.114 | 0.0090 |
| 8.9457339   | 0.123 | 0.114 | 0.0090 |
| 8.964240102 | 0.122 | 0.113 | 0.0090 |
| 8.966885605 | 0.122 | 0.113 | 0.0090 |
| 8.972315961 | 0.122 | 0.113 | 0.0090 |
| 8.977240071 | 0.122 | 0.113 | 0.0090 |
| 8.985996866 | 0.121 | 0.112 | 0.0090 |
| 8.986914129 | 0.121 | 0.112 | 0.0090 |
| 3.341666667 | 0.987 | 0.979 | 0.0080 |
| 3.352146264 | 0.986 | 0.978 | 0.0080 |
| 3.353117295 | 0.986 | 0.978 | 0.0080 |
| 3.358062636 | 0.986 | 0.978 | 0.0080 |
| 3.363234111 | 0.986 | 0.978 | 0.0080 |
| 3.36451049  | 0.986 | 0.978 | 0.0080 |
| 8.915963067 | 0.126 | 0.118 | 0.0080 |
| 8.943375701 | 0.123 | 0.115 | 0.0080 |
| 8.978847013 | 0.121 | 0.113 | 0.0080 |
| 8.981321342 | 0.121 | 0.113 | 0.0080 |
| 8.984279047 | 0.121 | 0.113 | 0.0080 |
| 8.989794917 | 0.12  | 0.112 | 0.0080 |
| 8.992526909 | 0.12  | 0.112 | 0.0080 |

|             |       |       |        |
|-------------|-------|-------|--------|
| 8.993047173 | 0.12  | 0.112 | 0.0080 |
| 9.010859047 | 0.118 | 0.11  | 0.0080 |
| 9.014618011 | 0.118 | 0.11  | 0.0080 |
| 9.103962944 | 0.108 | 0.1   | 0.0080 |
| 9.105084334 | 0.108 | 0.1   | 0.0080 |
| 9.107640049 | 0.108 | 0.1   | 0.0080 |
| 9.122854606 | 0.107 | 0.099 | 0.0080 |
| 9.125535859 | 0.107 | 0.099 | 0.0080 |
| 9.127250453 | 0.107 | 0.099 | 0.0080 |
| 3.295771965 | 0.988 | 0.981 | 0.0070 |
| 3.297259352 | 0.988 | 0.981 | 0.0070 |
| 3.298699196 | 0.988 | 0.981 | 0.0070 |
| 3.300202239 | 0.988 | 0.981 | 0.0070 |
| 3.302700082 | 0.988 | 0.981 | 0.0070 |
| 3.304156292 | 0.988 | 0.981 | 0.0070 |
| 3.317223913 | 0.987 | 0.98  | 0.0070 |
| 3.318675584 | 0.987 | 0.98  | 0.0070 |
| 3.326149425 | 0.987 | 0.98  | 0.0070 |
| 3.333333333 | 0.987 | 0.98  | 0.0070 |
| 9.018065268 | 0.117 | 0.11  | 0.0070 |
| 9.022684632 | 0.117 | 0.11  | 0.0070 |
| 9.025182135 | 0.117 | 0.11  | 0.0070 |
| 9.027912386 | 0.117 | 0.11  | 0.0070 |
| 9.031054405 | 0.116 | 0.109 | 0.0070 |
| 9.033370412 | 0.116 | 0.109 | 0.0070 |
| 9.035313668 | 0.116 | 0.109 | 0.0070 |
| 9.036590808 | 0.116 | 0.109 | 0.0070 |
| 9.042606769 | 0.115 | 0.108 | 0.0070 |
| 9.052574472 | 0.114 | 0.107 | 0.0070 |
| 9.054586082 | 0.114 | 0.107 | 0.0070 |
| 9.063624101 | 0.113 | 0.106 | 0.0070 |
| 9.065707434 | 0.112 | 0.105 | 0.0070 |
| 9.067231638 | 0.112 | 0.105 | 0.0070 |
| 9.068782026 | 0.112 | 0.105 | 0.0070 |
| 9.070598007 | 0.112 | 0.105 | 0.0070 |
| 9.072138127 | 0.112 | 0.105 | 0.0070 |
| 9.074238967 | 0.112 | 0.105 | 0.0070 |
| 9.076276665 | 0.112 | 0.105 | 0.0070 |
| 9.078480776 | 0.111 | 0.104 | 0.0070 |
| 9.081458417 | 0.111 | 0.104 | 0.0070 |
| 9.084737181 | 0.11  | 0.103 | 0.0070 |
| 9.087938206 | 0.11  | 0.103 | 0.0070 |
| 9.090909091 | 0.11  | 0.103 | 0.0070 |

|             |       |       |        |
|-------------|-------|-------|--------|
| 9.097483292 | 0.109 | 0.102 | 0.0070 |
| 8.996644295 | 0.119 | 0.112 | 0.0070 |
| 9.007362893 | 0.118 | 0.111 | 0.0070 |
| 9.100462379 | 0.108 | 0.101 | 0.0070 |
| 9.103006189 | 0.108 | 0.101 | 0.0070 |
| 9.110350076 | 0.107 | 0.1   | 0.0070 |
| 9.114379085 | 0.107 | 0.1   | 0.0070 |
| 9.11963434  | 0.107 | 0.1   | 0.0070 |
| 9.128975781 | 0.106 | 0.099 | 0.0070 |
| 9.133562715 | 0.106 | 0.099 | 0.0070 |
| 9.138657824 | 0.105 | 0.098 | 0.0070 |
| 9.141741071 | 0.105 | 0.098 | 0.0070 |
| 9.145071982 | 0.105 | 0.098 | 0.0070 |
| 9.164171657 | 0.103 | 0.096 | 0.0070 |
| 3.291871417 | 0.988 | 0.982 | 0.0060 |
| 3.295454545 | 0.988 | 0.982 | 0.0060 |
| 3.309477284 | 0.987 | 0.981 | 0.0060 |
| 3.315334459 | 0.987 | 0.981 | 0.0060 |
| 9.038518519 | 0.115 | 0.109 | 0.0060 |
| 9.040547945 | 0.115 | 0.109 | 0.0060 |
| 9.045868347 | 0.114 | 0.108 | 0.0060 |
| 9.04912598  | 0.114 | 0.108 | 0.0060 |
| 9.050863901 | 0.114 | 0.108 | 0.0060 |
| 9.056544562 | 0.113 | 0.107 | 0.0060 |
| 9.060235507 | 0.113 | 0.107 | 0.0060 |
| 9.077468631 | 0.111 | 0.105 | 0.0060 |
| 9.084238254 | 0.11  | 0.104 | 0.0060 |
| 9.094065657 | 0.109 | 0.103 | 0.0060 |
| 9.098052508 | 0.108 | 0.102 | 0.0060 |
| 9.452589897 | 0.082 | 0.076 | 0.0060 |
| 9.455244671 | 0.082 | 0.076 | 0.0060 |
| 9.464368052 | 0.081 | 0.075 | 0.0060 |
| 9.466157761 | 0.081 | 0.075 | 0.0060 |
| 9.470175439 | 0.081 | 0.075 | 0.0060 |
| 9.473684211 | 0.081 | 0.075 | 0.0060 |
| 9.490902359 | 0.079 | 0.073 | 0.0060 |
| 9.49457825  | 0.079 | 0.073 | 0.0060 |
| 9.003311258 | 0.118 | 0.112 | 0.0060 |
| 9.006857358 | 0.118 | 0.112 | 0.0060 |
| 9.148111496 | 0.104 | 0.098 | 0.0060 |
| 9.149631484 | 0.104 | 0.098 | 0.0060 |
| 9.151434585 | 0.104 | 0.098 | 0.0060 |
| 9.153194263 | 0.104 | 0.098 | 0.0060 |

|             |       |       |        |
|-------------|-------|-------|--------|
| 9.15761746  | 0.103 | 0.097 | 0.0060 |
| 9.160572252 | 0.103 | 0.097 | 0.0060 |
| 9.161257904 | 0.103 | 0.097 | 0.0060 |
| 9.166666667 | 0.102 | 0.096 | 0.0060 |
| 9.16954023  | 0.102 | 0.096 | 0.0060 |
| 9.172673062 | 0.102 | 0.096 | 0.0060 |
| 3.287336632 | 0.988 | 0.983 | 0.0050 |
| 9.173243025 | 0.101 | 0.096 | 0.0050 |
| 9.175817955 | 0.101 | 0.096 | 0.0050 |
| 9.204623879 | 0.099 | 0.094 | 0.0050 |
| 9.216517857 | 0.098 | 0.093 | 0.0050 |
| 9.219304078 | 0.098 | 0.093 | 0.0050 |
| 9.222332179 | 0.098 | 0.093 | 0.0050 |
| 9.225771294 | 0.097 | 0.092 | 0.0050 |
| 9.228479853 | 0.097 | 0.092 | 0.0050 |
| 9.230769231 | 0.097 | 0.092 | 0.0050 |
| 9.25524405  | 0.094 | 0.089 | 0.0050 |
| 9.259250862 | 0.094 | 0.089 | 0.0050 |
| 9.263225424 | 0.094 | 0.089 | 0.0050 |
| 9.265686275 | 0.094 | 0.089 | 0.0050 |
| 9.267479675 | 0.094 | 0.089 | 0.0050 |
| 9.269182838 | 0.094 | 0.089 | 0.0050 |
| 9.275839054 | 0.093 | 0.088 | 0.0050 |
| 9.278157895 | 0.093 | 0.088 | 0.0050 |
| 9.28028777  | 0.093 | 0.088 | 0.0050 |
| 9.390602434 | 0.085 | 0.08  | 0.0050 |
| 9.395194066 | 0.085 | 0.08  | 0.0050 |
| 9.400740658 | 0.085 | 0.08  | 0.0050 |
| 9.404882368 | 0.085 | 0.08  | 0.0050 |
| 9.422375143 | 0.084 | 0.079 | 0.0050 |
| 9.429475588 | 0.083 | 0.078 | 0.0050 |
| 9.43150193  | 0.083 | 0.078 | 0.0050 |
| 9.434621916 | 0.083 | 0.078 | 0.0050 |
| 9.438589579 | 0.083 | 0.078 | 0.0050 |
| 9.44854738  | 0.082 | 0.077 | 0.0050 |
| 9.450436846 | 0.082 | 0.077 | 0.0050 |
| 9.459451401 | 0.081 | 0.076 | 0.0050 |
| 9.462312855 | 0.081 | 0.076 | 0.0050 |
| 9.475648075 | 0.08  | 0.075 | 0.0050 |
| 9.479546711 | 0.08  | 0.075 | 0.0050 |
| 9.485266288 | 0.079 | 0.074 | 0.0050 |
| 9.498201439 | 0.078 | 0.073 | 0.0050 |
| 9.501552795 | 0.078 | 0.073 | 0.0050 |



|             |       |       |        |
|-------------|-------|-------|--------|
| 9.503325845 | 0.078 | 0.073 | 0.0050 |
| 9.505294176 | 0.078 | 0.073 | 0.0050 |
| 9.515565134 | 0.077 | 0.072 | 0.0050 |
| 9.51862069  | 0.077 | 0.072 | 0.0050 |
| 9.521904762 | 0.077 | 0.072 | 0.0050 |
| 9.531706871 | 0.076 | 0.071 | 0.0050 |
| 9.534293792 | 0.076 | 0.071 | 0.0050 |
| 9.53744269  | 0.076 | 0.071 | 0.0050 |
| 9.540223136 | 0.076 | 0.071 | 0.0050 |
| 9.649118487 | 0.068 | 0.063 | 0.0050 |
| 9.651563714 | 0.068 | 0.063 | 0.0050 |
| 9.653975096 | 0.068 | 0.063 | 0.0050 |
| 9.69348209  | 0.066 | 0.061 | 0.0050 |
| 9.695813093 | 0.066 | 0.061 | 0.0050 |
| 9.698108909 | 0.065 | 0.06  | 0.0050 |
| 9.700370329 | 0.065 | 0.06  | 0.0050 |
| 9.702598121 | 0.065 | 0.06  | 0.0050 |
| 9.778594771 | 0.06  | 0.055 | 0.0050 |
| 9.154387866 | 0.103 | 0.098 | 0.0050 |
| 9.379577653 | 0.086 | 0.081 | 0.0050 |
| 9.381703303 | 0.086 | 0.081 | 0.0050 |
| 9.385658373 | 0.086 | 0.081 | 0.0050 |
| 9.598657718 | 0.072 | 0.067 | 0.0050 |
| 3.241968602 | 0.99  | 0.986 | 0.0040 |
| 3.248183914 | 0.99  | 0.986 | 0.0040 |
| 3.255265467 | 0.989 | 0.985 | 0.0040 |
| 3.262148222 | 0.989 | 0.985 | 0.0040 |
| 3.26885663  | 0.989 | 0.985 | 0.0040 |
| 3.270979021 | 0.989 | 0.985 | 0.0040 |
| 3.283817488 | 0.988 | 0.984 | 0.0040 |
| 9.178593335 | 0.1   | 0.096 | 0.0040 |
| 9.182144831 | 0.1   | 0.096 | 0.0040 |
| 9.186088528 | 0.1   | 0.096 | 0.0040 |
| 9.187245935 | 0.1   | 0.096 | 0.0040 |
| 9.189338235 | 0.1   | 0.096 | 0.0040 |
| 9.192362429 | 0.1   | 0.096 | 0.0040 |
| 9.19408963  | 0.1   | 0.096 | 0.0040 |
| 9.195855582 | 0.099 | 0.095 | 0.0040 |
| 9.198540146 | 0.099 | 0.095 | 0.0040 |
| 9.201449275 | 0.099 | 0.095 | 0.0040 |
| 9.208437761 | 0.098 | 0.094 | 0.0040 |
| 9.212406015 | 0.098 | 0.094 | 0.0040 |
| 9.225079157 | 0.097 | 0.093 | 0.0040 |

|             |       |       |        |
|-------------|-------|-------|--------|
| 9.233440171 | 0.096 | 0.092 | 0.0040 |
| 9.236376166 | 0.096 | 0.092 | 0.0040 |
| 9.239010266 | 0.096 | 0.092 | 0.0040 |
| 9.24906015  | 0.095 | 0.091 | 0.0040 |
| 9.252716012 | 0.094 | 0.09  | 0.0040 |
| 9.270798086 | 0.093 | 0.089 | 0.0040 |
| 9.273442749 | 0.093 | 0.089 | 0.0040 |
| 9.285677841 | 0.092 | 0.088 | 0.0040 |
| 9.291059362 | 0.092 | 0.088 | 0.0040 |
| 9.292408422 | 0.092 | 0.088 | 0.0040 |
| 9.297088781 | 0.092 | 0.088 | 0.0040 |
| 9.301512441 | 0.092 | 0.088 | 0.0040 |
| 9.318954855 | 0.09  | 0.086 | 0.0040 |
| 9.38853404  | 0.085 | 0.081 | 0.0040 |
| 9.407093534 | 0.084 | 0.08  | 0.0040 |
| 9.409586057 | 0.084 | 0.08  | 0.0040 |
| 9.41391155  | 0.084 | 0.08  | 0.0040 |
| 9.418174125 | 0.084 | 0.08  | 0.0040 |
| 9.42534497  | 0.083 | 0.079 | 0.0040 |
| 9.427400468 | 0.083 | 0.079 | 0.0040 |
| 9.442501943 | 0.082 | 0.078 | 0.0040 |
| 9.446360153 | 0.082 | 0.078 | 0.0040 |
| 9.508765882 | 0.077 | 0.073 | 0.0040 |
| 9.511342316 | 0.077 | 0.073 | 0.0040 |
| 9.513042005 | 0.077 | 0.073 | 0.0040 |
| 9.527005433 | 0.076 | 0.072 | 0.0040 |
| 9.530725671 | 0.076 | 0.072 | 0.0040 |
| 9.543719639 | 0.075 | 0.071 | 0.0040 |
| 9.547163363 | 0.075 | 0.071 | 0.0040 |
| 9.619766366 | 0.07  | 0.066 | 0.0040 |
| 9.622636136 | 0.07  | 0.066 | 0.0040 |
| 9.637662133 | 0.069 | 0.065 | 0.0040 |
| 9.646638697 | 0.068 | 0.064 | 0.0040 |
| 9.65635333  | 0.067 | 0.063 | 0.0040 |
| 9.658699096 | 0.067 | 0.063 | 0.0040 |
| 9.663265306 | 0.067 | 0.063 | 0.0040 |
| 9.668044077 | 0.067 | 0.063 | 0.0040 |
| 9.670776318 | 0.067 | 0.063 | 0.0040 |
| 9.678709677 | 0.066 | 0.062 | 0.0040 |
| 9.681269841 | 0.066 | 0.062 | 0.0040 |
| 9.685019841 | 0.066 | 0.062 | 0.0040 |
| 9.68871124  | 0.066 | 0.062 | 0.0040 |
| 9.691115086 | 0.066 | 0.062 | 0.0040 |

|             |       |       |        |
|-------------|-------|-------|--------|
| 9.704793028 | 0.064 | 0.06  | 0.0040 |
| 9.706955775 | 0.063 | 0.059 | 0.0040 |
| 9.709087062 | 0.063 | 0.059 | 0.0040 |
| 9.711187572 | 0.063 | 0.059 | 0.0040 |
| 9.714271136 | 0.062 | 0.058 | 0.0040 |
| 9.718295889 | 0.062 | 0.058 | 0.0040 |
| 9.721250971 | 0.062 | 0.058 | 0.0040 |
| 9.723180077 | 0.062 | 0.058 | 0.0040 |
| 9.725082664 | 0.062 | 0.058 | 0.0040 |
| 9.727878563 | 0.062 | 0.058 | 0.0040 |
| 9.731531532 | 0.062 | 0.058 | 0.0040 |
| 9.774423338 | 0.06  | 0.056 | 0.0040 |
| 9.77694859  | 0.06  | 0.056 | 0.0040 |
| 9.780216831 | 0.059 | 0.055 | 0.0040 |
| 9.781815297 | 0.059 | 0.055 | 0.0040 |
| 9.785670545 | 0.059 | 0.055 | 0.0040 |
| 9.789471092 | 0.059 | 0.055 | 0.0040 |
| 9.358058608 | 0.087 | 0.083 | 0.0040 |
| 9.359487179 | 0.087 | 0.083 | 0.0040 |
| 9.362539683 | 0.087 | 0.083 | 0.0040 |
| 9.367579053 | 0.087 | 0.083 | 0.0040 |
| 9.370354055 | 0.087 | 0.083 | 0.0040 |
| 9.372814685 | 0.087 | 0.083 | 0.0040 |
| 9.377155172 | 0.086 | 0.082 | 0.0040 |
| 9.550555493 | 0.074 | 0.07  | 0.0040 |
| 9.555531168 | 0.074 | 0.07  | 0.0040 |
| 9.560433663 | 0.074 | 0.07  | 0.0040 |
| 9.563630593 | 0.074 | 0.07  | 0.0040 |
| 9.575966437 | 0.073 | 0.069 | 0.0040 |
| 9.578942185 | 0.073 | 0.069 | 0.0040 |
| 9.581876457 | 0.073 | 0.069 | 0.0040 |
| 9.584770115 | 0.073 | 0.069 | 0.0040 |
| 9.595684394 | 0.072 | 0.068 | 0.0040 |
| 9.597044815 | 0.072 | 0.068 | 0.0040 |
| 9.601587302 | 0.071 | 0.067 | 0.0040 |
| 9.604218881 | 0.071 | 0.067 | 0.0040 |
| 9.605781185 | 0.071 | 0.067 | 0.0040 |
| 9.607071175 | 0.071 | 0.067 | 0.0040 |
| 9.608609069 | 0.071 | 0.067 | 0.0040 |
| 3.118270618 | 0.992 | 0.989 | 0.0030 |
| 3.126352665 | 0.992 | 0.989 | 0.0030 |
| 3.135151056 | 0.992 | 0.989 | 0.0030 |
| 3.140056022 | 0.992 | 0.989 | 0.0030 |

|             |       |       |        |
|-------------|-------|-------|--------|
| 3.227076454 | 0.99  | 0.987 | 0.0030 |
| 3.229557844 | 0.99  | 0.987 | 0.0030 |
| 3.231546232 | 0.99  | 0.987 | 0.0030 |
| 3.233182893 | 0.99  | 0.987 | 0.0030 |
| 3.235278538 | 0.99  | 0.987 | 0.0030 |
| 3.250088337 | 0.989 | 0.986 | 0.0030 |
| 3.252974254 | 0.989 | 0.986 | 0.0030 |
| 3.276148583 | 0.988 | 0.985 | 0.0030 |
| 3.280409946 | 0.988 | 0.985 | 0.0030 |
| 9.241901776 | 0.095 | 0.092 | 0.0030 |
| 9.244499792 | 0.095 | 0.092 | 0.0030 |
| 9.247347822 | 0.095 | 0.092 | 0.0030 |
| 9.25085034  | 0.094 | 0.091 | 0.0030 |
| 9.305008945 | 0.091 | 0.088 | 0.0030 |
| 9.309018568 | 0.091 | 0.088 | 0.0030 |
| 9.311660963 | 0.091 | 0.088 | 0.0030 |
| 9.316625156 | 0.09  | 0.087 | 0.0030 |
| 9.321518081 | 0.089 | 0.086 | 0.0030 |
| 9.32583324  | 0.089 | 0.086 | 0.0030 |
| 9.330845771 | 0.089 | 0.086 | 0.0030 |
| 9.61088905  | 0.07  | 0.067 | 0.0030 |
| 9.613893858 | 0.07  | 0.067 | 0.0030 |
| 9.616852613 | 0.07  | 0.067 | 0.0030 |
| 9.624530075 | 0.069 | 0.066 | 0.0030 |
| 9.627314815 | 0.069 | 0.066 | 0.0030 |
| 9.630991285 | 0.069 | 0.066 | 0.0030 |
| 9.633694719 | 0.069 | 0.066 | 0.0030 |
| 9.641572456 | 0.068 | 0.065 | 0.0030 |
| 9.644123607 | 0.068 | 0.065 | 0.0030 |
| 9.674775251 | 0.066 | 0.063 | 0.0030 |
| 9.791656619 | 0.058 | 0.055 | 0.0030 |
| 9.795880583 | 0.058 | 0.055 | 0.0030 |
| 9.815295246 | 0.058 | 0.055 | 0.0030 |
| 9.832633053 | 0.058 | 0.055 | 0.0030 |
| 9.834022039 | 0.058 | 0.055 | 0.0030 |
| 9.836054559 | 0.058 | 0.055 | 0.0030 |
| 9.839334108 | 0.058 | 0.055 | 0.0030 |
| 9.734216336 | 0.061 | 0.058 | 0.0030 |
| 9.735970722 | 0.061 | 0.058 | 0.0030 |
| 9.738550923 | 0.061 | 0.058 | 0.0030 |
| 9.75012987  | 0.061 | 0.058 | 0.0030 |
| 9.760952381 | 0.06  | 0.057 | 0.0030 |
| 9.764673311 | 0.06  | 0.057 | 0.0030 |

|             |       |       |        |
|-------------|-------|-------|--------|
| 9.770084567 | 0.06  | 0.057 | 0.0030 |
| 9.344735461 | 0.088 | 0.085 | 0.0030 |
| 9.347115658 | 0.088 | 0.085 | 0.0030 |
| 9.355990783 | 0.087 | 0.084 | 0.0030 |
| 9.569842738 | 0.073 | 0.07  | 0.0030 |
| 9.588185415 | 0.072 | 0.069 | 0.0030 |
| 9.591829935 | 0.072 | 0.069 | 0.0030 |
| 9.594045265 | 0.072 | 0.069 | 0.0030 |
| 3.006001551 | 0.994 | 0.992 | 0.0020 |
| 3.113465482 | 0.992 | 0.99  | 0.0020 |
| 3.144198524 | 0.991 | 0.989 | 0.0020 |
| 3.146045815 | 0.991 | 0.989 | 0.0020 |
| 3.15105364  | 0.991 | 0.989 | 0.0020 |
| 3.157777778 | 0.991 | 0.989 | 0.0020 |
| 3.161027668 | 0.991 | 0.989 | 0.0020 |
| 3.162224249 | 0.991 | 0.989 | 0.0020 |
| 3.167017477 | 0.991 | 0.989 | 0.0020 |
| 3.190915451 | 0.99  | 0.988 | 0.0020 |
| 3.197363799 | 0.99  | 0.988 | 0.0020 |
| 3.207230484 | 0.99  | 0.988 | 0.0020 |
| 3.219610449 | 0.99  | 0.988 | 0.0020 |
| 3.224473474 | 0.99  | 0.988 | 0.0020 |
| 9.314022796 | 0.09  | 0.088 | 0.0020 |
| 9.335540839 | 0.088 | 0.086 | 0.0020 |
| 9.337991819 | 0.088 | 0.086 | 0.0020 |
| 9.340650494 | 0.088 | 0.086 | 0.0020 |
| 9.841894763 | 0.057 | 0.055 | 0.0020 |
| 9.843134843 | 0.057 | 0.055 | 0.0020 |
| 9.84435562  | 0.057 | 0.055 | 0.0020 |
| 9.845557543 | 0.057 | 0.055 | 0.0020 |
| 12.10158263 | 0.004 | 0.002 | 0.0020 |
| 12.10896961 | 0.004 | 0.002 | 0.0020 |
| 12.11694409 | 0.004 | 0.002 | 0.0020 |
| 12.2009857  | 0.003 | 0.001 | 0.0020 |
| 12.20405712 | 0.003 | 0.001 | 0.0020 |
| 12.2273622  | 0.003 | 0.001 | 0.0020 |
| 9.351332398 | 0.087 | 0.085 | 0.0020 |
| 1.96045354  | 1     | 0.999 | 0.0010 |
| 2.999417294 | 0.994 | 0.993 | 0.0010 |
| 3.008861439 | 0.993 | 0.992 | 0.0010 |
| 3.011512297 | 0.993 | 0.992 | 0.0010 |
| 3.016311247 | 0.993 | 0.992 | 0.0010 |
| 3.025738094 | 0.993 | 0.992 | 0.0010 |

|             |       |       |        |
|-------------|-------|-------|--------|
| 3.035444947 | 0.993 | 0.992 | 0.0010 |
| 3.043672014 | 0.993 | 0.992 | 0.0010 |
| 3.049064171 | 0.993 | 0.992 | 0.0010 |
| 3.051315789 | 0.993 | 0.992 | 0.0010 |
| 3.058979106 | 0.993 | 0.992 | 0.0010 |
| 3.080128205 | 0.992 | 0.991 | 0.0010 |
| 3.084219858 | 0.992 | 0.991 | 0.0010 |
| 3.090172239 | 0.992 | 0.991 | 0.0010 |
| 3.102642971 | 0.992 | 0.991 | 0.0010 |
| 3.178562831 | 0.99  | 0.989 | 0.0010 |
| 9.846741045 | 0.056 | 0.055 | 0.0010 |
| 9.847906546 | 0.056 | 0.055 | 0.0010 |
| 9.849054454 | 0.056 | 0.055 | 0.0010 |
| 9.850185164 | 0.056 | 0.055 | 0.0010 |
| 9.868329868 | 0.054 | 0.053 | 0.0010 |
| 10.22557666 | 0.04  | 0.039 | 0.0010 |
| 11.38071349 | 0.01  | 0.009 | 0.0010 |
| 11.39543269 | 0.01  | 0.009 | 0.0010 |
| 11.41741071 | 0.01  | 0.009 | 0.0010 |
| 11.4389234  | 0.01  | 0.009 | 0.0010 |
| 11.44982852 | 0.01  | 0.009 | 0.0010 |
| 11.45168657 | 0.01  | 0.009 | 0.0010 |
| 11.52475845 | 0.008 | 0.007 | 0.0010 |
| 11.53594771 | 0.008 | 0.007 | 0.0010 |
| 11.55330882 | 0.008 | 0.007 | 0.0010 |
| 11.57490079 | 0.008 | 0.007 | 0.0010 |
| 11.64766718 | 0.007 | 0.006 | 0.0010 |
| 11.94356852 | 0.005 | 0.004 | 0.0010 |
| 11.95818283 | 0.005 | 0.004 | 0.0010 |
| 12.09733815 | 0.004 | 0.003 | 0.0010 |
| 12.12957158 | 0.003 | 0.002 | 0.0010 |
| 12.14588859 | 0.003 | 0.002 | 0.0010 |
| 12.15692308 | 0.003 | 0.002 | 0.0010 |
| 12.16208955 | 0.003 | 0.002 | 0.0010 |
| 12.1805744  | 0.003 | 0.002 | 0.0010 |
| 12.19777563 | 0.003 | 0.002 | 0.0010 |
| 12.25403226 | 0.002 | 0.001 | 0.0010 |
| 12.26539589 | 0.002 | 0.001 | 0.0010 |
| 12.29578393 | 0.002 | 0.001 | 0.0010 |
| 12.32483382 | 0.002 | 0.001 | 0.0010 |
| 12.33329675 | 0.002 | 0.001 | 0.0010 |
| 11.4980315  | 0.009 | 0.008 | 0.0010 |
| 11.50396825 | 0.009 | 0.008 | 0.0010 |

|             |       |       |        |
|-------------|-------|-------|--------|
| 11.51154401 | 0.009 | 0.008 | 0.0010 |
| 10.14652211 | 0.043 | 0.042 | 0.0010 |
| 10.14760349 | 0.043 | 0.042 | 0.0010 |
| 10.14870094 | 0.043 | 0.042 | 0.0010 |
| 0.195652174 | 1     | 1     | 0.0000 |
| 1.435035389 | 1     | 1     | 0.0000 |
| 1.725639054 | 1     | 1     | 0.0000 |
| 1.817633292 | 1     | 1     | 0.0000 |
| 2.13744469  | 0.999 | 0.999 | 0.0000 |
| 2.226884345 | 0.999 | 0.999 | 0.0000 |
| 2.264757452 | 0.999 | 0.999 | 0.0000 |
| 2.310145535 | 0.999 | 0.999 | 0.0000 |
| 2.36505733  | 0.999 | 0.999 | 0.0000 |
| 2.409505908 | 0.999 | 0.999 | 0.0000 |
| 2.432748538 | 0.999 | 0.999 | 0.0000 |
| 2.472222222 | 0.999 | 0.999 | 0.0000 |
| 2.772693236 | 0.997 | 0.997 | 0.0000 |
| 2.775443511 | 0.997 | 0.997 | 0.0000 |
| 2.803938859 | 0.996 | 0.996 | 0.0000 |
| 2.81016731  | 0.996 | 0.996 | 0.0000 |
| 2.814135564 | 0.996 | 0.996 | 0.0000 |
| 2.819621248 | 0.996 | 0.996 | 0.0000 |
| 2.827557756 | 0.996 | 0.996 | 0.0000 |
| 2.898261278 | 0.995 | 0.995 | 0.0000 |
| 2.905438312 | 0.995 | 0.995 | 0.0000 |
| 2.909463487 | 0.995 | 0.995 | 0.0000 |
| 2.918332667 | 0.995 | 0.995 | 0.0000 |
| 2.984785375 | 0.994 | 0.994 | 0.0000 |
| 2.989712455 | 0.994 | 0.994 | 0.0000 |
| 3.071124855 | 0.992 | 0.992 | 0.0000 |
| 9.85129906  | 0.055 | 0.055 | 0.0000 |
| 9.852396514 | 0.055 | 0.055 | 0.0000 |
| 9.853477888 | 0.055 | 0.055 | 0.0000 |
| 9.858655479 | 0.054 | 0.054 | 0.0000 |
| 9.86013302  | 0.054 | 0.054 | 0.0000 |
| 9.862987988 | 0.054 | 0.054 | 0.0000 |
| 9.876017196 | 0.053 | 0.053 | 0.0000 |
| 9.881980226 | 0.053 | 0.053 | 0.0000 |
| 9.899843658 | 0.053 | 0.053 | 0.0000 |
| 9.916316527 | 0.053 | 0.053 | 0.0000 |
| 9.918963255 | 0.053 | 0.053 | 0.0000 |
| 9.921870231 | 0.053 | 0.053 | 0.0000 |
| 9.923370523 | 0.052 | 0.052 | 0.0000 |

|             |       |       |        |
|-------------|-------|-------|--------|
| 9.923953273 | 0.052 | 0.052 | 0.0000 |
| 9.924527227 | 0.052 | 0.052 | 0.0000 |
| 10.14440621 | 0.043 | 0.043 | 0.0000 |
| 10.14545647 | 0.043 | 0.043 | 0.0000 |
| 10.14981484 | 0.042 | 0.042 | 0.0000 |
| 10.15094555 | 0.042 | 0.042 | 0.0000 |
| 10.15327696 | 0.042 | 0.042 | 0.0000 |
| 10.15625954 | 0.042 | 0.042 | 0.0000 |
| 10.17095266 | 0.041 | 0.041 | 0.0000 |
| 10.17656834 | 0.041 | 0.041 | 0.0000 |
| 10.18840066 | 0.041 | 0.041 | 0.0000 |
| 10.22305141 | 0.04  | 0.04  | 0.0000 |
| 10.22814018 | 0.039 | 0.039 | 0.0000 |
| 10.22988843 | 0.039 | 0.039 | 0.0000 |
| 10.23257212 | 0.039 | 0.039 | 0.0000 |
| 10.23529774 | 0.039 | 0.039 | 0.0000 |
| 10.23715786 | 0.039 | 0.039 | 0.0000 |
| 10.25105042 | 0.038 | 0.038 | 0.0000 |
| 10.28268904 | 0.037 | 0.037 | 0.0000 |
| 10.28470111 | 0.037 | 0.037 | 0.0000 |
| 10.28674203 | 0.037 | 0.037 | 0.0000 |
| 10.31873016 | 0.035 | 0.035 | 0.0000 |
| 10.495701   | 0.029 | 0.029 | 0.0000 |
| 10.50542175 | 0.029 | 0.029 | 0.0000 |
| 10.51097613 | 0.029 | 0.029 | 0.0000 |
| 10.5166122  | 0.029 | 0.029 | 0.0000 |
| 10.80145985 | 0.021 | 0.021 | 0.0000 |
| 10.80796392 | 0.021 | 0.021 | 0.0000 |
| 10.82063055 | 0.02  | 0.02  | 0.0000 |
| 10.82675698 | 0.02  | 0.02  | 0.0000 |
| 10.82732694 | 0.02  | 0.02  | 0.0000 |
| 10.83045977 | 0.02  | 0.02  | 0.0000 |
| 10.83624709 | 0.02  | 0.02  | 0.0000 |
| 10.83974849 | 0.02  | 0.02  | 0.0000 |
| 10.84324499 | 0.02  | 0.02  | 0.0000 |
| 10.96662959 | 0.016 | 0.016 | 0.0000 |
| 10.97167585 | 0.016 | 0.016 | 0.0000 |
| 10.98022912 | 0.016 | 0.016 | 0.0000 |
| 10.98829201 | 0.016 | 0.016 | 0.0000 |
| 11.3754287  | 0.01  | 0.01  | 0.0000 |
| 11.45642273 | 0.009 | 0.009 | 0.0000 |
| 11.47066775 | 0.009 | 0.009 | 0.0000 |
| 11.48148148 | 0.009 | 0.009 | 0.0000 |



|             |       |       |         |
|-------------|-------|-------|---------|
| 11.48292824 | 0.009 | 0.009 | 0.0000  |
| 11.48686835 | 0.009 | 0.009 | 0.0000  |
| 11.49094951 | 0.009 | 0.009 | 0.0000  |
| 11.49430015 | 0.009 | 0.009 | 0.0000  |
| 11.51844532 | 0.008 | 0.008 | 0.0000  |
| 11.58910534 | 0.007 | 0.007 | 0.0000  |
| 11.59965035 | 0.007 | 0.007 | 0.0000  |
| 11.61188811 | 0.007 | 0.007 | 0.0000  |
| 11.62329514 | 0.007 | 0.007 | 0.0000  |
| 11.63591534 | 0.007 | 0.007 | 0.0000  |
| 11.64120802 | 0.007 | 0.007 | 0.0000  |
| 11.65383932 | 0.006 | 0.006 | 0.0000  |
| 11.660401   | 0.006 | 0.006 | 0.0000  |
| 11.67892157 | 0.006 | 0.006 | 0.0000  |
| 11.69924677 | 0.006 | 0.006 | 0.0000  |
| 11.73365854 | 0.006 | 0.006 | 0.0000  |
| 11.76888889 | 0.006 | 0.006 | 0.0000  |
| 11.86842569 | 0.005 | 0.005 | 0.0000  |
| 11.8999383  | 0.005 | 0.005 | 0.0000  |
| 11.91588235 | 0.005 | 0.005 | 0.0000  |
| 11.92296296 | 0.005 | 0.005 | 0.0000  |
| 11.93195521 | 0.005 | 0.005 | 0.0000  |
| 11.96785853 | 0.004 | 0.004 | 0.0000  |
| 11.99144621 | 0.004 | 0.004 | 0.0000  |
| 12.02832101 | 0.004 | 0.004 | 0.0000  |
| 12.04571692 | 0.004 | 0.004 | 0.0000  |
| 12.06117553 | 0.004 | 0.004 | 0.0000  |
| 12.08497246 | 0.004 | 0.004 | 0.0000  |
| 12.36623032 | 0.001 | 0.001 | 0.0000  |
| 12.43865718 | 0.001 | 0.001 | 0.0000  |
| 12.49031008 | 0.001 | 0.001 | 0.0000  |
| 12.5101626  | 0.001 | 0.001 | 0.0000  |
| 12.5306544  | 0.001 | 0.001 | 0.0000  |
| 12.63412817 | 0.001 | 0.001 | 0.0000  |
| 12.74423338 | 0.001 | 0.001 | 0.0000  |
| 12.88059701 | 0.001 | 0.001 | 0.0000  |
| 13.02       | 0.001 | 0.001 | 0.0000  |
| 13.57777778 | 0     | 0     | 0.0000  |
| 13.80819672 | 0     | 0     | 0.0000  |
| 15.01639344 | 0     | 0     | 0.0000  |
| 9.929823697 | 0.05  | 0.051 | -0.0010 |
| 9.930312743 | 0.05  | 0.051 | -0.0010 |
| 9.931031202 | 0.05  | 0.051 | -0.0010 |

|             |       |       |         |
|-------------|-------|-------|---------|
| 9.931739819 | 0.05  | 0.051 | -0.0010 |
| 9.932653061 | 0.05  | 0.051 | -0.0010 |
| 10.30189109 | 0.035 | 0.036 | -0.0010 |
| 10.30418691 | 0.035 | 0.036 | -0.0010 |
| 10.30651791 | 0.035 | 0.036 | -0.0010 |
| 10.30888491 | 0.035 | 0.036 | -0.0010 |
| 10.31251907 | 0.035 | 0.036 | -0.0010 |
| 10.31621047 | 0.035 | 0.036 | -0.0010 |
| 10.48695799 | 0.029 | 0.03  | -0.0010 |
| 10.77739487 | 0.021 | 0.022 | -0.0010 |
| 10.78069592 | 0.021 | 0.022 | -0.0010 |
| 10.78432579 | 0.021 | 0.022 | -0.0010 |
| 10.79225151 | 0.021 | 0.022 | -0.0010 |
| 10.79855072 | 0.021 | 0.022 | -0.0010 |
| 10.92051821 | 0.017 | 0.018 | -0.0010 |
| 10.92647059 | 0.017 | 0.018 | -0.0010 |
| 10.92940199 | 0.017 | 0.018 | -0.0010 |
| 10.93274218 | 0.017 | 0.018 | -0.0010 |
| 11.03439153 | 0.014 | 0.015 | -0.0010 |
| 11.03935185 | 0.014 | 0.015 | -0.0010 |
| 11.04230573 | 0.014 | 0.015 | -0.0010 |
| 11.05177542 | 0.014 | 0.015 | -0.0010 |
| 11.06465418 | 0.014 | 0.015 | -0.0010 |
| 11.07601781 | 0.014 | 0.015 | -0.0010 |
| 11.08430233 | 0.014 | 0.015 | -0.0010 |
| 11.09410625 | 0.014 | 0.015 | -0.0010 |
| 11.36730205 | 0.01  | 0.011 | -0.0010 |
| 11.37250677 | 0.01  | 0.011 | -0.0010 |
| 11.78319783 | 0.005 | 0.006 | -0.0010 |
| 11.78983133 | 0.005 | 0.006 | -0.0010 |
| 11.80793115 | 0.005 | 0.006 | -0.0010 |
| 11.83677851 | 0.005 | 0.006 | -0.0010 |
| 13.24932331 | 0     | 0.001 | -0.0010 |
| 13.50710109 | 0     | 0.001 | -0.0010 |
| 2.504416961 | 0.998 | 0.999 | -0.0010 |
| 2.528001867 | 0.998 | 0.999 | -0.0010 |
| 2.547470256 | 0.998 | 0.999 | -0.0010 |
| 2.549395554 | 0.998 | 0.999 | -0.0010 |
| 2.561742088 | 0.998 | 0.999 | -0.0010 |
| 2.588913876 | 0.998 | 0.999 | -0.0010 |
| 2.606253421 | 0.998 | 0.999 | -0.0010 |
| 2.625410509 | 0.998 | 0.999 | -0.0010 |
| 2.681233116 | 0.997 | 0.998 | -0.0010 |

|             |       |       |         |
|-------------|-------|-------|---------|
| 2.696178938 | 0.997 | 0.998 | -0.0010 |
| 2.705518018 | 0.997 | 0.998 | -0.0010 |
| 2.709005376 | 0.997 | 0.998 | -0.0010 |
| 2.729340702 | 0.997 | 0.998 | -0.0010 |
| 2.760640606 | 0.997 | 0.998 | -0.0010 |
| 2.782694199 | 0.996 | 0.997 | -0.0010 |
| 2.788655095 | 0.996 | 0.997 | -0.0010 |
| 2.792699248 | 0.996 | 0.997 | -0.0010 |
| 2.797026417 | 0.996 | 0.997 | -0.0010 |
| 2.84178744  | 0.995 | 0.996 | -0.0010 |
| 2.851113553 | 0.995 | 0.996 | -0.0010 |
| 2.858425212 | 0.995 | 0.996 | -0.0010 |
| 2.870200673 | 0.995 | 0.996 | -0.0010 |
| 2.885136661 | 0.995 | 0.996 | -0.0010 |
| 2.927292961 | 0.994 | 0.995 | -0.0010 |
| 2.934466562 | 0.994 | 0.995 | -0.0010 |
| 2.943802521 | 0.994 | 0.995 | -0.0010 |
| 2.94757326  | 0.994 | 0.995 | -0.0010 |
| 2.958229942 | 0.994 | 0.995 | -0.0010 |
| 2.971966206 | 0.994 | 0.995 | -0.0010 |
| 2.977891156 | 0.994 | 0.995 | -0.0010 |
| 2.98204398  | 0.994 | 0.995 | -0.0010 |
| 9.854543531 | 0.054 | 0.055 | -0.0010 |
| 9.85610766  | 0.054 | 0.055 | -0.0010 |
| 9.857649443 | 0.054 | 0.055 | -0.0010 |
| 9.922778772 | 0.052 | 0.053 | -0.0010 |
| 9.925092582 | 0.051 | 0.052 | -0.0010 |
| 9.92564953  | 0.051 | 0.052 | -0.0010 |
| 9.926466613 | 0.051 | 0.052 | -0.0010 |
| 9.927532427 | 0.051 | 0.052 | -0.0010 |
| 9.928314491 | 0.051 | 0.052 | -0.0010 |
| 9.94130809  | 0.049 | 0.05  | -0.0010 |
| 9.971428571 | 0.049 | 0.05  | -0.0010 |
| 10.06920498 | 0.046 | 0.047 | -0.0010 |
| 10.06968726 | 0.046 | 0.047 | -0.0010 |
| 10.07168551 | 0.045 | 0.046 | -0.0010 |
| 10.07220311 | 0.045 | 0.046 | -0.0010 |
| 10.07272823 | 0.045 | 0.046 | -0.0010 |
| 10.07409034 | 0.045 | 0.046 | -0.0010 |
| 10.08163401 | 0.044 | 0.045 | -0.0010 |
| 10.08230592 | 0.044 | 0.045 | -0.0010 |
| 10.10461345 | 0.044 | 0.045 | -0.0010 |
| 10.14286443 | 0.043 | 0.044 | -0.0010 |

|             |       |       |         |
|-------------|-------|-------|---------|
| 10.15810524 | 0.041 | 0.042 | -0.0010 |
| 10.15936508 | 0.041 | 0.042 | -0.0010 |
| 10.16130081 | 0.041 | 0.042 | -0.0010 |
| 10.16394544 | 0.041 | 0.042 | -0.0010 |
| 10.16739039 | 0.041 | 0.042 | -0.0010 |
| 10.19672343 | 0.04  | 0.041 | -0.0010 |
| 10.20142394 | 0.04  | 0.041 | -0.0010 |
| 10.206188   | 0.04  | 0.041 | -0.0010 |
| 10.21136194 | 0.04  | 0.041 | -0.0010 |
| 10.21820779 | 0.04  | 0.041 | -0.0010 |
| 10.22140523 | 0.04  | 0.041 | -0.0010 |
| 10.24001536 | 0.038 | 0.039 | -0.0010 |
| 10.24391856 | 0.038 | 0.039 | -0.0010 |
| 10.24795082 | 0.038 | 0.039 | -0.0010 |
| 10.2526327  | 0.037 | 0.038 | -0.0010 |
| 10.25816123 | 0.037 | 0.038 | -0.0010 |
| 10.27124375 | 0.037 | 0.038 | -0.0010 |
| 10.27952494 | 0.037 | 0.038 | -0.0010 |
| 10.28070521 | 0.037 | 0.038 | -0.0010 |
| 10.28987029 | 0.036 | 0.037 | -0.0010 |
| 10.29304422 | 0.036 | 0.037 | -0.0010 |
| 10.29631255 | 0.036 | 0.037 | -0.0010 |
| 10.32666667 | 0.034 | 0.035 | -0.0010 |
| 10.33558559 | 0.034 | 0.035 | -0.0010 |
| 10.34497526 | 0.034 | 0.035 | -0.0010 |
| 10.35591245 | 0.034 | 0.035 | -0.0010 |
| 10.36101554 | 0.034 | 0.035 | -0.0010 |
| 10.36498295 | 0.034 | 0.035 | -0.0010 |
| 10.36900871 | 0.034 | 0.035 | -0.0010 |
| 10.37175235 | 0.034 | 0.035 | -0.0010 |
| 10.3759611  | 0.033 | 0.034 | -0.0010 |
| 10.38023363 | 0.033 | 0.034 | -0.0010 |
| 10.38314739 | 0.033 | 0.034 | -0.0010 |
| 10.38610614 | 0.033 | 0.034 | -0.0010 |
| 10.38911095 | 0.033 | 0.034 | -0.0010 |
| 10.39216289 | 0.033 | 0.034 | -0.0010 |
| 10.45628036 | 0.031 | 0.032 | -0.0010 |
| 10.46955381 | 0.03  | 0.031 | -0.0010 |
| 10.47270696 | 0.03  | 0.031 | -0.0010 |
| 10.47621251 | 0.03  | 0.031 | -0.0010 |
| 10.48110534 | 0.03  | 0.031 | -0.0010 |
| 10.52241715 | 0.028 | 0.029 | -0.0010 |
| 10.52830941 | 0.028 | 0.029 | -0.0010 |

|             |       |       |         |
|-------------|-------|-------|---------|
| 10.53438228 | 0.028 | 0.029 | -0.0010 |
| 10.5405486  | 0.028 | 0.029 | -0.0010 |
| 10.54342667 | 0.028 | 0.029 | -0.0010 |
| 10.54608145 | 0.028 | 0.029 | -0.0010 |
| 10.7422712  | 0.022 | 0.023 | -0.0010 |
| 10.74861316 | 0.022 | 0.023 | -0.0010 |
| 10.75550021 | 0.022 | 0.023 | -0.0010 |
| 10.75809822 | 0.022 | 0.023 | -0.0010 |
| 10.76098973 | 0.022 | 0.023 | -0.0010 |
| 10.76629477 | 0.022 | 0.023 | -0.0010 |
| 10.81391147 | 0.02  | 0.021 | -0.0010 |
| 10.84943351 | 0.019 | 0.02  | -0.0010 |
| 10.85398817 | 0.019 | 0.02  | -0.0010 |
| 10.85620301 | 0.019 | 0.02  | -0.0010 |
| 10.859035   | 0.019 | 0.02  | -0.0010 |
| 10.86211825 | 0.019 | 0.02  | -0.0010 |
| 10.86961088 | 0.019 | 0.02  | -0.0010 |
| 10.89159892 | 0.018 | 0.019 | -0.0010 |
| 10.89828229 | 0.018 | 0.019 | -0.0010 |
| 10.90567327 | 0.018 | 0.019 | -0.0010 |
| 10.95619048 | 0.016 | 0.017 | -0.0010 |
| 10.96148148 | 0.016 | 0.017 | -0.0010 |
| 10.9642401  | 0.016 | 0.017 | -0.0010 |
| 10.99205097 | 0.015 | 0.016 | -0.0010 |
| 10.99618321 | 0.015 | 0.016 | -0.0010 |
| 11.01282051 | 0.015 | 0.016 | -0.0010 |
| 11.0275264  | 0.015 | 0.016 | -0.0010 |
| 11.17878648 | 0.013 | 0.014 | -0.0010 |
| 11.27588176 | 0.011 | 0.012 | -0.0010 |
| 11.28018976 | 0.011 | 0.012 | -0.0010 |
| 11.29074685 | 0.011 | 0.012 | -0.0010 |
| 11.30270112 | 0.011 | 0.012 | -0.0010 |
| 11.31276088 | 0.011 | 0.012 | -0.0010 |
| 11.33748616 | 0.011 | 0.012 | -0.0010 |
| 11.35857143 | 0.011 | 0.012 | -0.0010 |
| 9.928824721 | 0.05  | 0.052 | -0.0020 |
| 9.929327739 | 0.05  | 0.052 | -0.0020 |
| 9.934199134 | 0.049 | 0.051 | -0.0020 |
| 9.936085927 | 0.049 | 0.051 | -0.0020 |
| 9.938432977 | 0.049 | 0.051 | -0.0020 |
| 10.29962967 | 0.035 | 0.037 | -0.0020 |
| 10.48331479 | 0.029 | 0.031 | -0.0020 |
| 10.48499104 | 0.029 | 0.031 | -0.0020 |

|             |       |       |         |
|-------------|-------|-------|---------|
| 10.77193933 | 0.021 | 0.023 | -0.0020 |
| 10.91229193 | 0.017 | 0.019 | -0.0020 |
| 10.91576175 | 0.017 | 0.019 | -0.0020 |
| 10.9163486  | 0.017 | 0.019 | -0.0020 |
| 10.94006684 | 0.016 | 0.018 | -0.0020 |
| 10.94863142 | 0.016 | 0.018 | -0.0020 |
| 11.0305789  | 0.014 | 0.016 | -0.0020 |
| 11.10702614 | 0.013 | 0.015 | -0.0020 |
| 11.11499611 | 0.013 | 0.015 | -0.0020 |
| 11.11944056 | 0.013 | 0.015 | -0.0020 |
| 11.12338028 | 0.013 | 0.015 | -0.0020 |
| 11.1315621  | 0.013 | 0.015 | -0.0020 |
| 11.15641711 | 0.013 | 0.015 | -0.0020 |
| 11.18756611 | 0.012 | 0.014 | -0.0020 |
| 11.19701493 | 0.012 | 0.014 | -0.0020 |
| 11.20150376 | 0.012 | 0.014 | -0.0020 |
| 11.20756437 | 0.012 | 0.014 | -0.0020 |
| 11.21320346 | 0.012 | 0.014 | -0.0020 |
| 11.21782988 | 0.012 | 0.014 | -0.0020 |
| 11.22607164 | 0.012 | 0.014 | -0.0020 |
| 11.23553965 | 0.012 | 0.014 | -0.0020 |
| 11.24515504 | 0.012 | 0.014 | -0.0020 |
| 11.25880282 | 0.011 | 0.013 | -0.0020 |
| 11.27138671 | 0.011 | 0.013 | -0.0020 |
| 11.36181818 | 0.01  | 0.012 | -0.0020 |
| 2.64963991  | 0.997 | 0.999 | -0.0020 |
| 2.66420636  | 0.997 | 0.999 | -0.0020 |
| 10.03267974 | 0.046 | 0.048 | -0.0020 |
| 10.06601307 | 0.046 | 0.048 | -0.0020 |
| 10.06734694 | 0.046 | 0.048 | -0.0020 |
| 10.06826018 | 0.046 | 0.048 | -0.0020 |
| 10.06872933 | 0.046 | 0.048 | -0.0020 |
| 10.0701763  | 0.045 | 0.047 | -0.0020 |
| 10.07092555 | 0.045 | 0.047 | -0.0020 |
| 10.07605552 | 0.044 | 0.046 | -0.0020 |
| 10.07783162 | 0.044 | 0.046 | -0.0020 |
| 10.08002049 | 0.044 | 0.046 | -0.0020 |
| 10.12780727 | 0.043 | 0.045 | -0.0020 |
| 10.12987561 | 0.043 | 0.045 | -0.0020 |
| 10.13528955 | 0.043 | 0.045 | -0.0020 |
| 10.14085206 | 0.043 | 0.045 | -0.0020 |
| 10.39819268 | 0.032 | 0.034 | -0.0020 |
| 10.40295519 | 0.032 | 0.034 | -0.0020 |

|             |       |       |         |
|-------------|-------|-------|---------|
| 10.40850945 | 0.032 | 0.034 | -0.0020 |
| 10.41816416 | 0.032 | 0.034 | -0.0020 |
| 10.42403356 | 0.032 | 0.034 | -0.0020 |
| 10.43961353 | 0.031 | 0.033 | -0.0020 |
| 10.44778613 | 0.031 | 0.033 | -0.0020 |
| 10.45283664 | 0.031 | 0.033 | -0.0020 |
| 10.45927079 | 0.03  | 0.032 | -0.0020 |
| 10.46103239 | 0.03  | 0.032 | -0.0020 |
| 10.46332737 | 0.03  | 0.032 | -0.0020 |
| 10.46589147 | 0.03  | 0.032 | -0.0020 |
| 10.55175038 | 0.027 | 0.029 | -0.0020 |
| 10.55777778 | 0.027 | 0.029 | -0.0020 |
| 10.56368794 | 0.027 | 0.029 | -0.0020 |
| 10.56940223 | 0.027 | 0.029 | -0.0020 |
| 10.57556936 | 0.027 | 0.029 | -0.0020 |
| 10.71175279 | 0.023 | 0.025 | -0.0020 |
| 10.71685509 | 0.023 | 0.025 | -0.0020 |
| 10.8779562  | 0.018 | 0.02  | -0.0020 |
| 10.88354839 | 0.018 | 0.02  | -0.0020 |
| 10.88799283 | 0.018 | 0.02  | -0.0020 |
| 10.62007934 | 0.025 | 0.028 | -0.0030 |
| 10.62284483 | 0.025 | 0.028 | -0.0030 |
| 10.62718531 | 0.025 | 0.028 | -0.0030 |
| 10.62964594 | 0.025 | 0.028 | -0.0030 |
| 10.64104759 | 0.025 | 0.028 | -0.0030 |
| 10.65288434 | 0.025 | 0.028 | -0.0030 |
| 10.65767974 | 0.025 | 0.028 | -0.0030 |
| 10.68104515 | 0.024 | 0.027 | -0.0030 |
| 10.68337484 | 0.024 | 0.027 | -0.0030 |
| 10.69130296 | 0.024 | 0.027 | -0.0030 |
| 10.69848756 | 0.023 | 0.026 | -0.0030 |
| 10.70176303 | 0.023 | 0.026 | -0.0030 |
| 10.70644338 | 0.023 | 0.026 | -0.0030 |
| 10.70894064 | 0.023 | 0.026 | -0.0030 |
| 10.42705167 | 0.031 | 0.034 | -0.0030 |
| 10.43167702 | 0.031 | 0.034 | -0.0030 |
| 10.59060695 | 0.026 | 0.029 | -0.0030 |
| 10.6027653  | 0.026 | 0.029 | -0.0030 |
| 10.60504373 | 0.026 | 0.029 | -0.0030 |
| 10.60606061 | 0.026 | 0.029 | -0.0030 |
| 10.60837381 | 0.026 | 0.029 | -0.0030 |
| 10.61303582 | 0.026 | 0.029 | -0.0030 |
| 10.72467573 | 0.022 | 0.025 | -0.0030 |

|             |       |       |         |
|-------------|-------|-------|---------|
| 10.73261056 | 0.022 | 0.025 | -0.0030 |
| 10.73677458 | 0.022 | 0.025 | -0.0030 |
| 10.73949789 | 0.022 | 0.025 | -0.0030 |
| 10.61742682 | 0.025 | 0.029 | -0.0040 |
| 10.66421569 | 0.024 | 0.028 | -0.0040 |
| 10.6716792  | 0.024 | 0.028 | -0.0040 |
| 10.67848192 | 0.024 | 0.028 | -0.0040 |

**Table S2 | Univariate cox regression analyses for in-hospital mortality in septic patients with atrial fibrillation.**

| <b>Variables</b>            | <b>HR (95% CI)</b> | <b>p-value</b> |
|-----------------------------|--------------------|----------------|
| Age                         | 1.02 (1.01~1.02)   | <0.001         |
| Gender                      | 1.20 (1.08~1.34)   | 0.001          |
| Ethnicity                   |                    |                |
| White                       | 1.21 (0.85~1.74)   | 0.289          |
| Black                       | 1.24 (0.82~1.86)   | 0.306          |
| Other                       | 1.84 (1.27~2.67)   | 0.001          |
| Myocardial infarct          | 1.22 (1.09~1.38)   | 0.001          |
| Congestive heart failure    | 1.26 (1.14~1.40)   | <0.001         |
| Peripheral vascular disease | 1.13 (0.99~1.30)   | 0.078          |
| Cerebrovascular disease     | 1.38 (1.20~1.58)   | <0.001         |
| Dementia                    | 1.18 (0.95~1.47)   | 0.14           |
| Chronic pulmonary disease   | 1.09 (0.97~1.22)   | 0.134          |
| Rheumatic disease           | 1.06 (0.82~1.38)   | 0.638          |
| Peptic ulcer disease        | 1.59 (1.21~2.10)   | 0.001          |
| Paraplegia                  | 1.48 (1.17~1.85)   | 0.001          |
| Renal disease               | 1.47 (1.32~1.64)   | <0.001         |
| Malignant cancer            | 1.90 (1.65~2.19)   | <0.001         |
| Metastatic solid tumor      | 2.67 (2.18~3.29)   | <0.001         |
| Diabetes                    | 0.97 (0.85~1.12)   | 0.705          |
| Hypertension                | 11.81 (9.77~14.27) | <0.001         |
| Hemoglobin                  | 1.00 (0.98~1.03)   | 0.759          |
| RDW                         | 1.13 (1.11~1.15)   | <0.001         |
| HRR                         | 0.92 (0.89~0.95)   | <0.001         |
| Hematocrit                  | 0.99 (0.98~1.00)   | 0.159          |
| Platelets                   | 1.00 (1.00~1.00)   | <0.001         |
| WBC                         | 1.00 (1.00~1.01)   | 0.344          |
| Albumin                     | 0.91 (0.8~1.03)    | 0.146          |
| Anion gap                   | 1.07 (1.06~1.08)   | <0.001         |
| Bicarbonate                 | 1.00(0.99~1.01)    | 0.536          |
| Bun                         | 1.01 (1.01~1.01)   | <0.001         |
| Calcium                     | 1.22 (1.14~1.29)   | <0.001         |
| Chloride                    | 0.97 (0.96~0.98)   | <0.001         |



|                         |                  |        |
|-------------------------|------------------|--------|
| Creatinine              | 1.14 (1.11~1.17) | <0.001 |
| Sodium                  | 1.01 (1.00~1.02) | 0.013  |
| Lymphocytes             | 1.00 (1.00~1.00) | 0.092  |
| Monocytes               | 1.00 (1.00~1.00) | 0.6    |
| Neutrophils             | 1.00 (1.00~1.00) | 0.69   |
| INR                     | 1.09 (1.06~1.12) | <0.001 |
| PT                      | 1.01 (1.01~1.01) | <0.001 |
| APTT                    | 1.00 (1.00~1.00) | <0.001 |
| ALT                     | 1.00 (1.00~1.00) | 0.356  |
| ALP                     | 1.00 (1.00~1.00) | 0.399  |
| AST                     | 1.00 (1.00~1.00) | 0.4    |
| CKCPK                   | 1.00 (1.00~1.00) | 0.16   |
| CKMB                    | 1.00 (1.00~1.00) | 0.837  |
| HR                      | 1.01 (1.01~1.01) | <0.001 |
| SBP                     | 1.03 (1.02~1.03) | <0.001 |
| DBP                     | 1.03 (1.03~1.04) | <0.001 |
| MBP                     | 1.04 (1.03~1.05) | <0.001 |
| RR                      | 1.08 (1.06~1.09) | <0.001 |
| Temperature             | 1.07 (0.97~1.19) | 0.163  |
| Spo2                    | 0.94 (0.92~0.96) | <0.001 |
| Glucose                 | 1.00 (1.00~1.00) | 0.552  |
| Warfarin                | 0.52 (0.41~0.66) | <0.001 |
| Amiodarone              | 0.94 (0.82~1.07) | 0.346  |
| Dopamine                | 1.47 (1.19~1.81) | <0.001 |
| Epinephrine             | 0.90 (0.75~1.08) | 0.255  |
| Vasopressin             | 1.88 (1.64~2.16) | <0.001 |
| Antibiotic              | 0.83 (0.72~0.95) | 0.007  |
| Ventilation             | 1.08 (0.97~1.20) | 0.14   |
| APSIH                   | 1.02 (1.02~1.02) | <0.001 |
| SOFA                    | 1.03 (1.00~1.06) | 0.022  |
| GCS                     | 0.92 (0.91~0.93) | <0.001 |
| OASIS                   | 1.04 (1.03~1.04) | <0.001 |
| Length of ICU stay      | 1.04 (1.03~1.05) | <0.001 |
| Length of hospital stay | 1.00 (1.00~1.00) | 0.302  |

Abbreviations: HR, heart rate; SBP, systolic blood pressure; DBP, diastolic blood pressure; MBP, mean blood pressure; RR, respiratory rate; SpO<sub>2</sub>, percutaneous oxygen saturation; RDW, red cell distribution width; HRR, hemoglobin/red cell distribution width; Bun, blood urea nitrogen; INR, international normalized ratio; PT, prothrombin time; APTT, activated partial thromboplastin time; ALT, alanine aminotransferase; AST, aspartate aminotransferase; CK-MB, creatine kinase-MB isoenzyme; APS III, acute physiology score III; SOFA, sequential organ failure assessment score; GCS, Glasgow coma score; OASIS, oxford acute severity of illness score; ICU, Intensive care unit.
